# Supplementary material for: S-Functionalization of 3,5-bis(2-pyridyl)-1,2,4,6-thiatriazine: probing the effect of alkyl chain length in the development of tethered materials
Source: Royal Society of Chemistry journal article supplement (doi:10.1039/c6nj03721f), 2017-01-01
Supplement: c6nj03721f1.pdf [file c6nj03721f1.pdf]

Electronic Supporting Information

# *S*-functionalization of 3,5-*bis*(2-pyridyl)-1,2,4,6-thiatriazine: Probing the effect of alkyl chain length in the development of tethered materials

Nathan J. Yutronkie,<sup>ab</sup> Perrine Tami,<sup>ab</sup> Simarpreet Singh,<sup>c</sup> Elizabeth Kleisath,<sup>ab</sup> Bulat M. Gabidullin,<sup>a</sup>  
Rebecca Davis<sup>\*c</sup> and Jaclyn L. Brusso<sup>\*ab</sup>

<sup>a</sup>Department of Chemistry and Biomolecular Science and <sup>b</sup>Centre for Catalysis Research and Innovation, University of Ottawa, Ottawa, Ontario K1N 6N5, Canada. <sup>c</sup> Department of Chemistry, University of Manitoba, Winnipeg, Manitoba R3T 2N2, Canada.

## Contents (58 pages)

|          |                                                                                                  |
|----------|--------------------------------------------------------------------------------------------------|
| Page S2  | UV-Vis Spectroscopy                                                                              |
| Page S3  | <sup>1</sup> H-NMR and <sup>13</sup> C-NMR Spectra for <i>S,S'</i> -alkyl-Py <sub>2</sub> TTAs   |
| Page S13 | <sup>1</sup> H-NMR and <sup>13</sup> C-NMR Spectra for <i>S</i> -cyclopropyl-Py <sub>2</sub> TTA |
| Page S15 | DEPT-135 Spectrum for <i>S</i> -cyclopropyl-Py <sub>2</sub> TTA                                  |
| Page S16 | ESI-MS Spectra for <i>S,S'</i> -butyl-Py <sub>2</sub> TTA                                        |
| Page S17 | ESI-MS Spectra for <i>S</i> -cyclopropyl-Py <sub>2</sub> TTA                                     |
| Page S18 | <sup>1</sup> H-NMR and <sup>13</sup> C-NMR Spectra for <i>S</i> -isopropyl-Py <sub>2</sub> TTA   |
| Page S20 | <sup>1</sup> H-NMR and <sup>13</sup> C-NMR Spectra for <i>S</i> -ethenyl-Py <sub>2</sub> TTA     |
| Page S22 | Crystallography                                                                                  |
| Page S23 | Computation Study                                                                                |
| Page S58 | References                                                                                       |

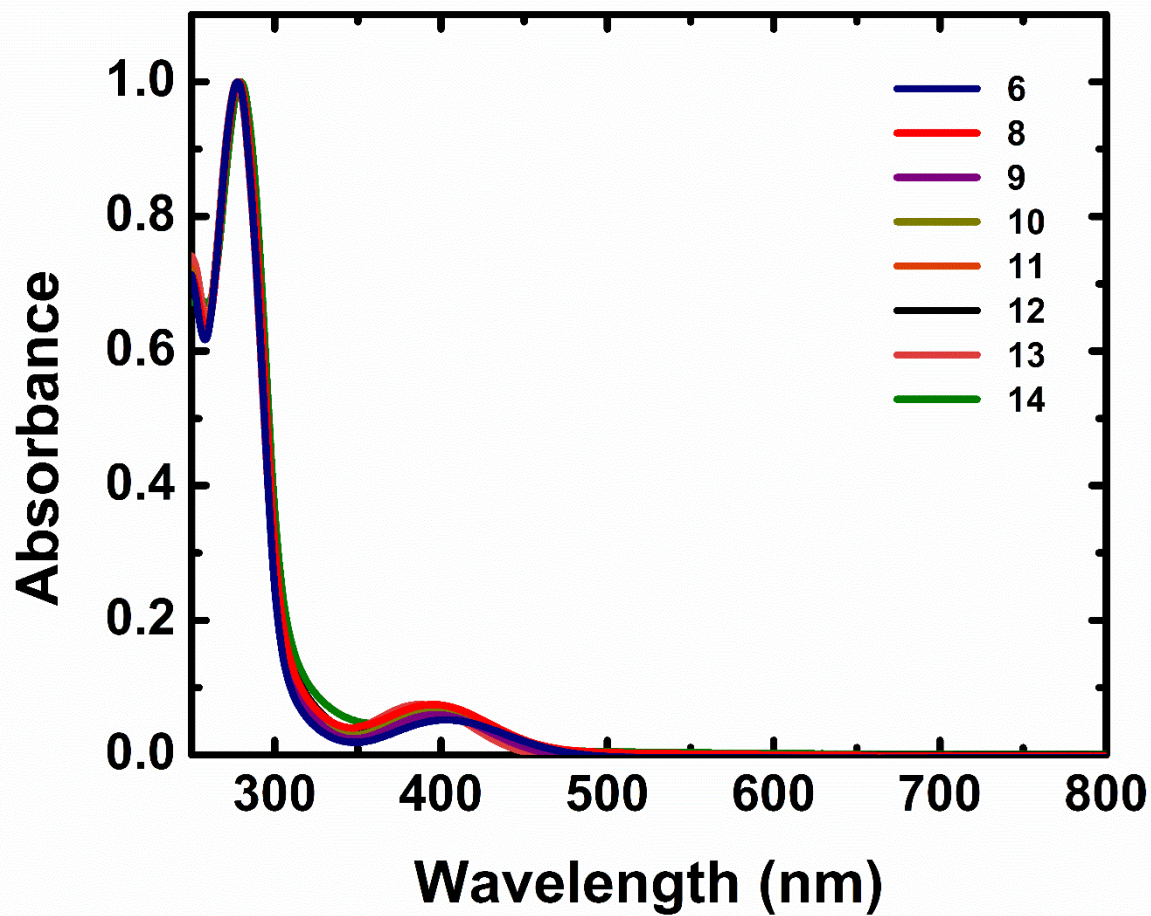

**Figure S1.** Experimental absorption spectra of **6** (blue line), **8** (red line), **9** (purple line), **10** (yellow line), **11** (orange line), **12** (black line), **13** (coral line) and **14** (green line) in CH<sub>2</sub>Cl<sub>2</sub>.

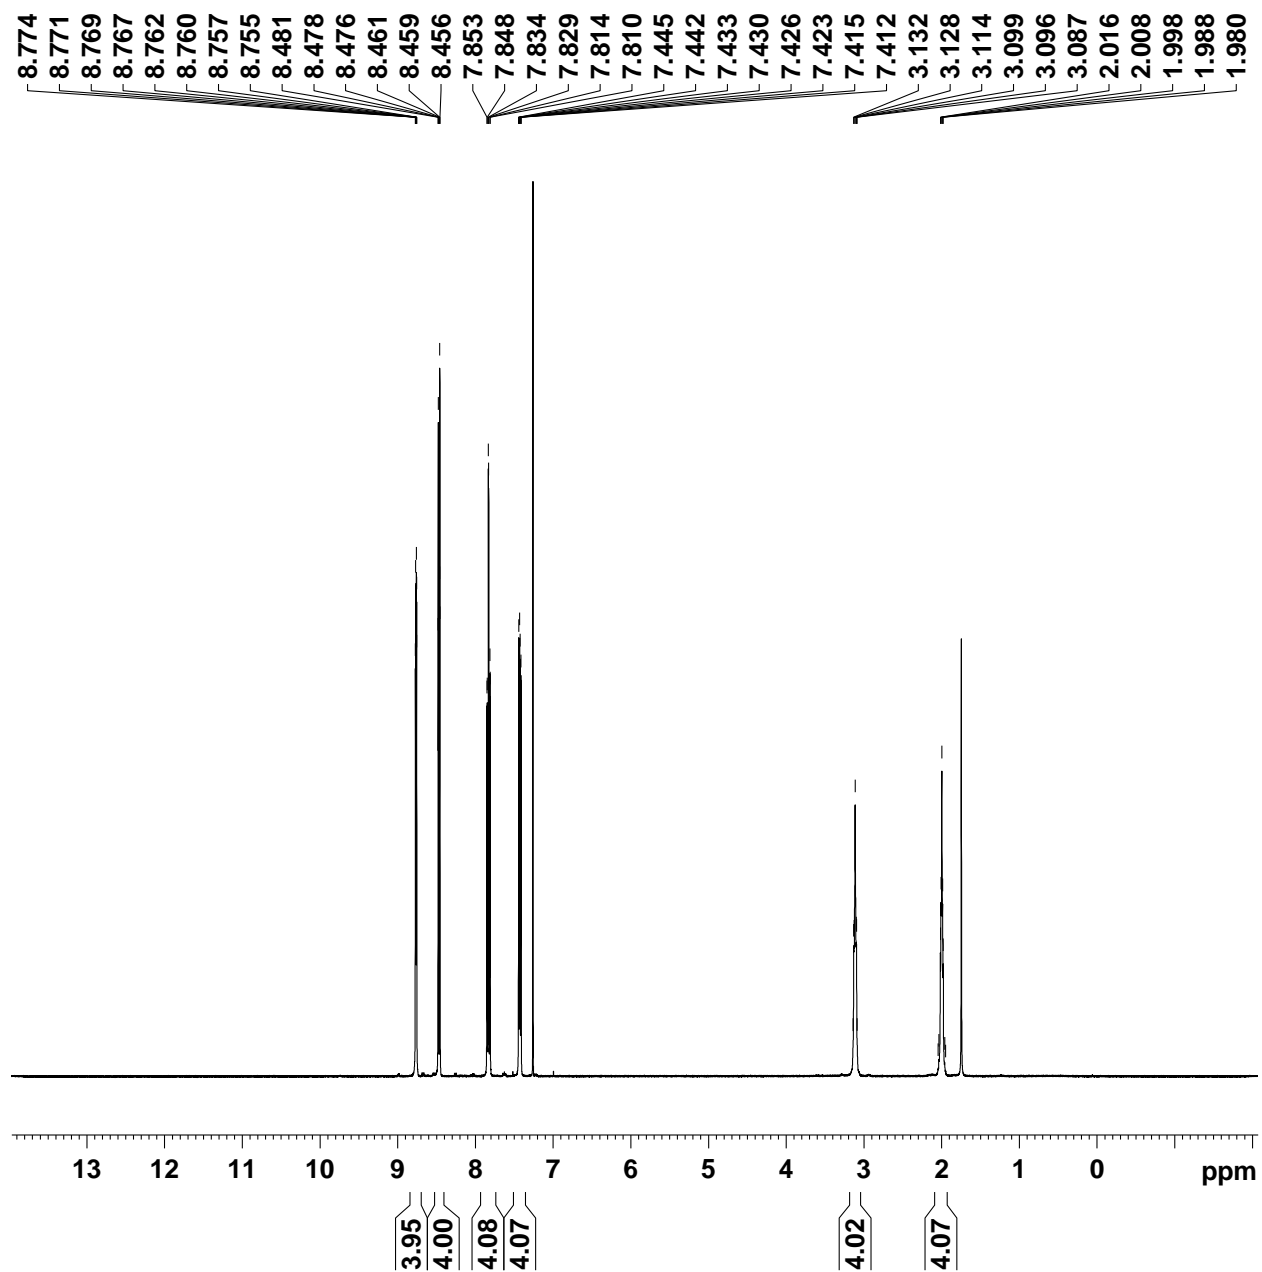

**Figure S2.**  $^1\text{H}$  NMR spectrum of *S,S'*-butyl-bis(Py<sub>2</sub>TTA) (8) in CDCl<sub>3</sub>.

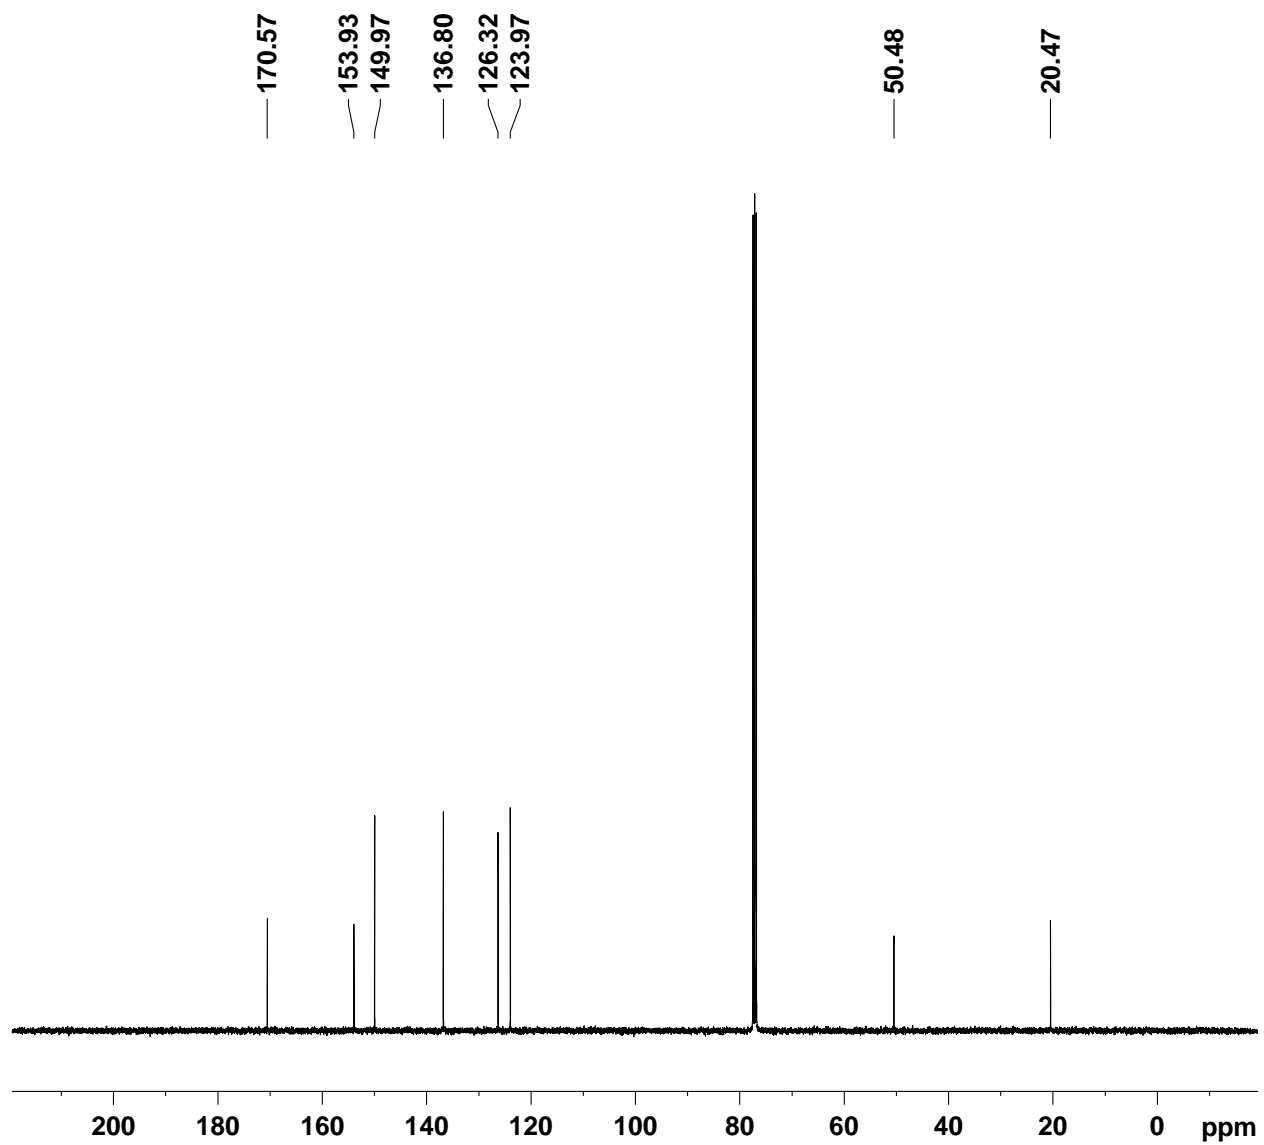

**Figure S3.**  $^{13}\text{C}$  NMR spectrum of *S,S'*-butyl-*bis*(Py<sub>2</sub>TTA) (**8**) in CDCl<sub>3</sub>.

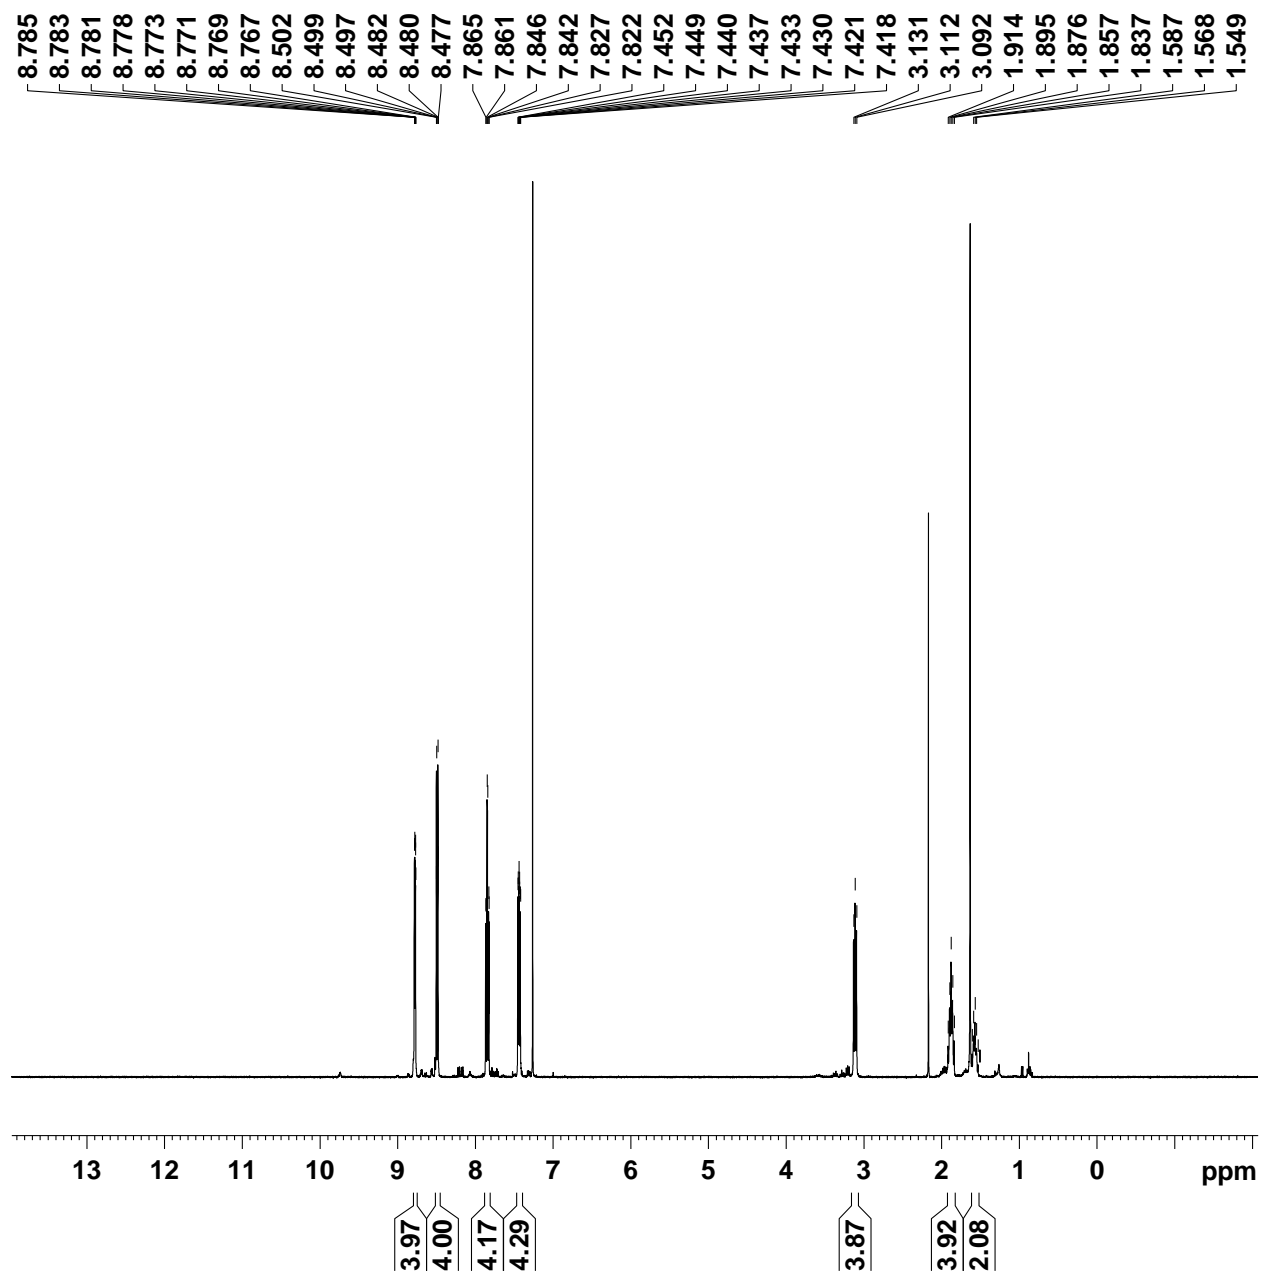

**Figure S4.**  $^1\text{H}$  NMR spectrum of *S,S'*-pentyl-*bis*( $\text{Py}_2\text{TTA}$ ) (**9**) in  $\text{CDCl}_3$ .

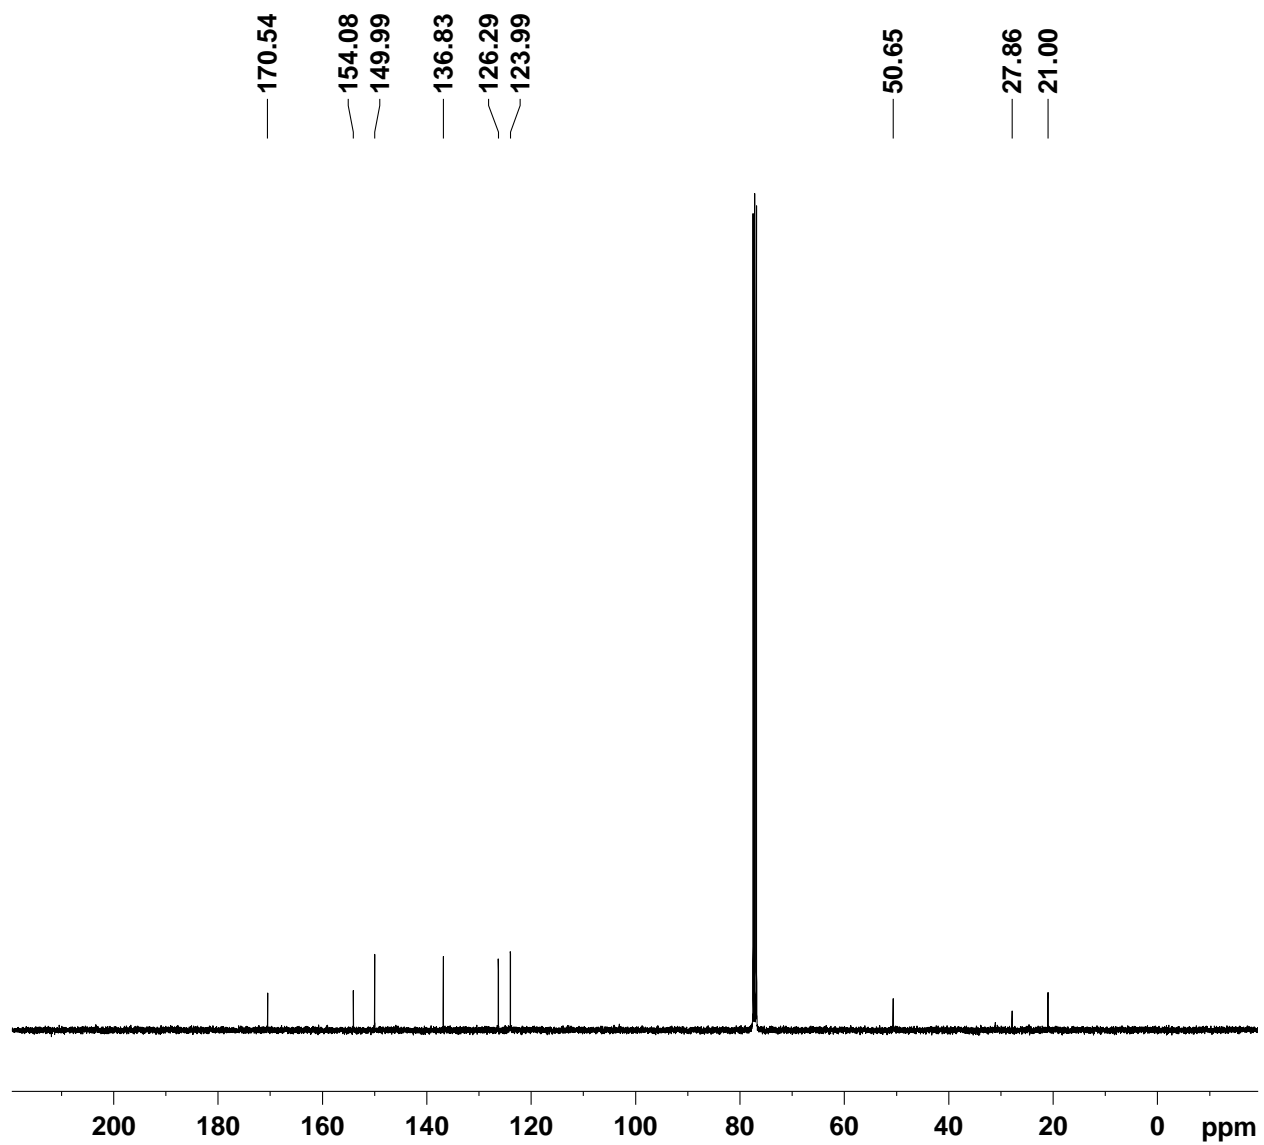

Figure S5.  $^{13}\text{C}$  NMR spectrum of *S,S'*-pentyl-*bis*(Py<sub>2</sub>TTA) (**9**) in CDCl<sub>3</sub>.

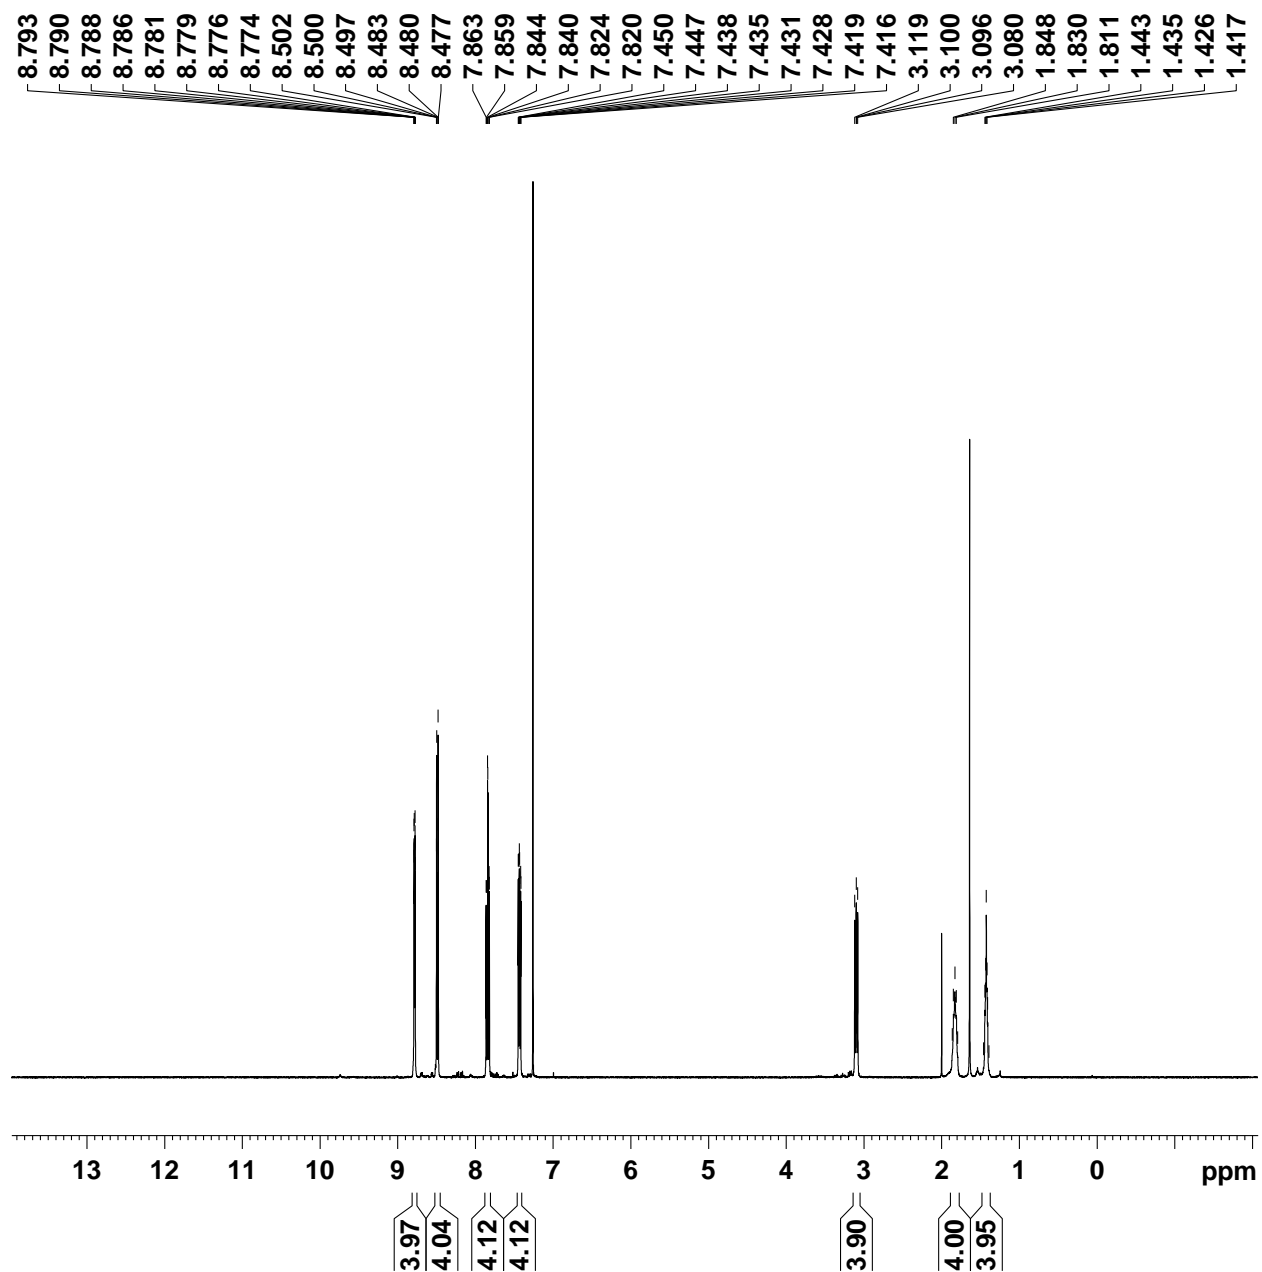

**Figure S6.**  $^1\text{H}$  NMR spectrum of *S,S'*-hexyl-*bis*( $\text{Py}_2\text{TTA}$ ) (**10**) in  $\text{CDCl}_3$ .

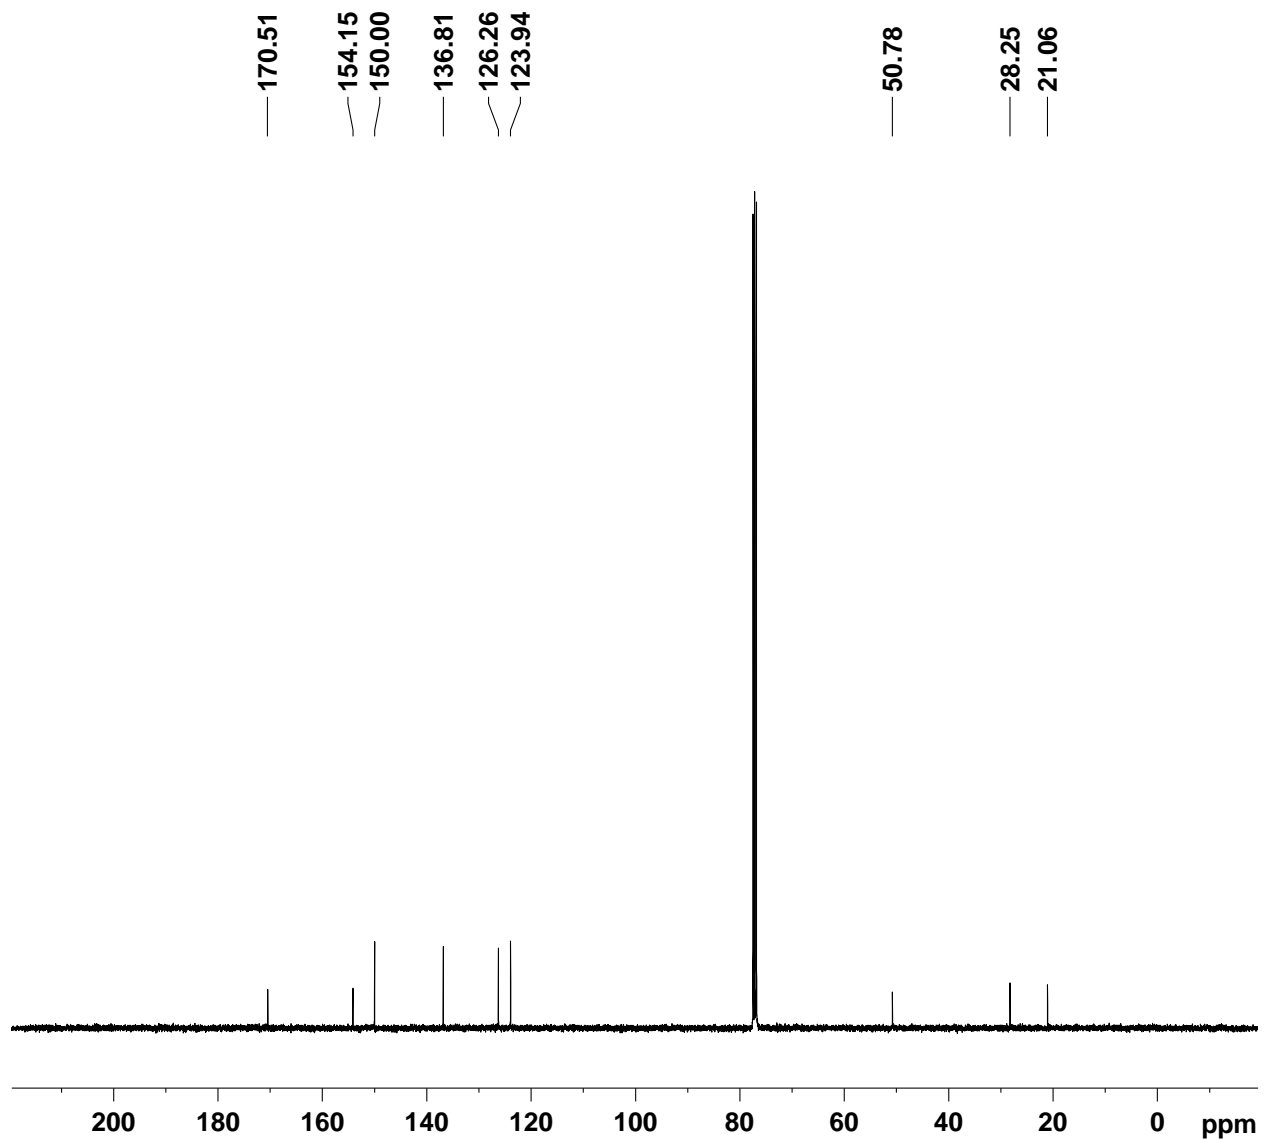

Figure S7.  $^{13}\text{C}$  NMR spectrum of *S,S'*-hexyl-*bis*(Py<sub>2</sub>TTA) (**10**) in CDCl<sub>3</sub>.



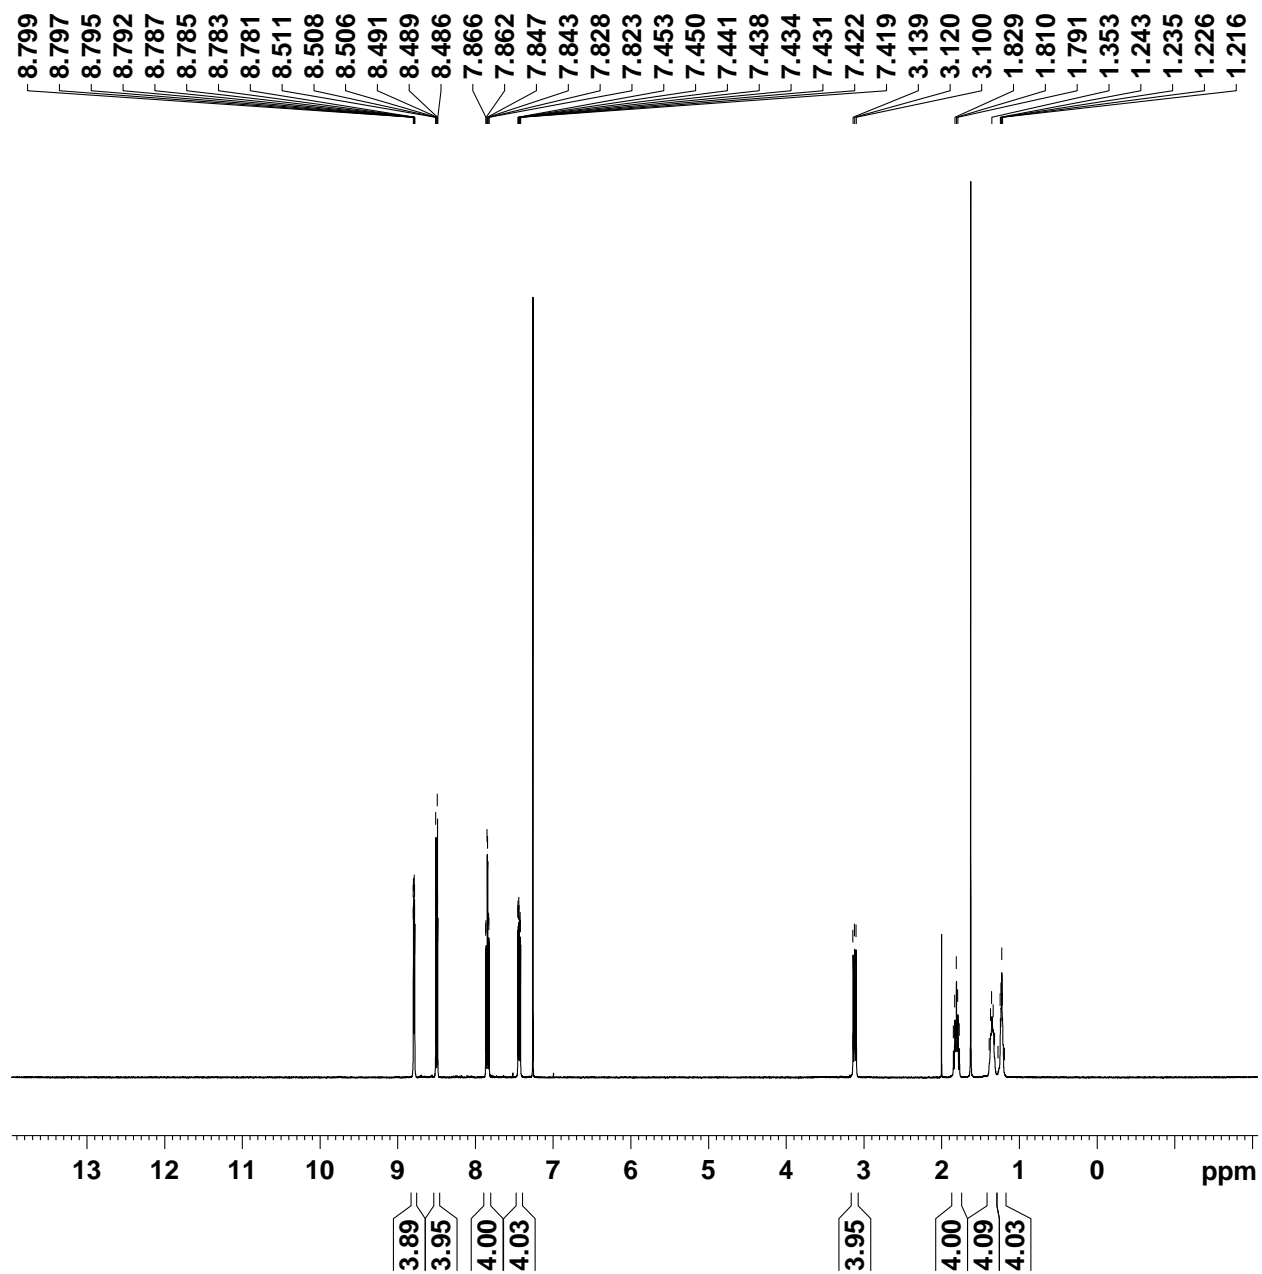

**Figure S8.**  $^1\text{H}$  NMR spectrum of *S,S'*-octyl-bis(Py<sub>2</sub>TTA) (11) in CDCl<sub>3</sub>.

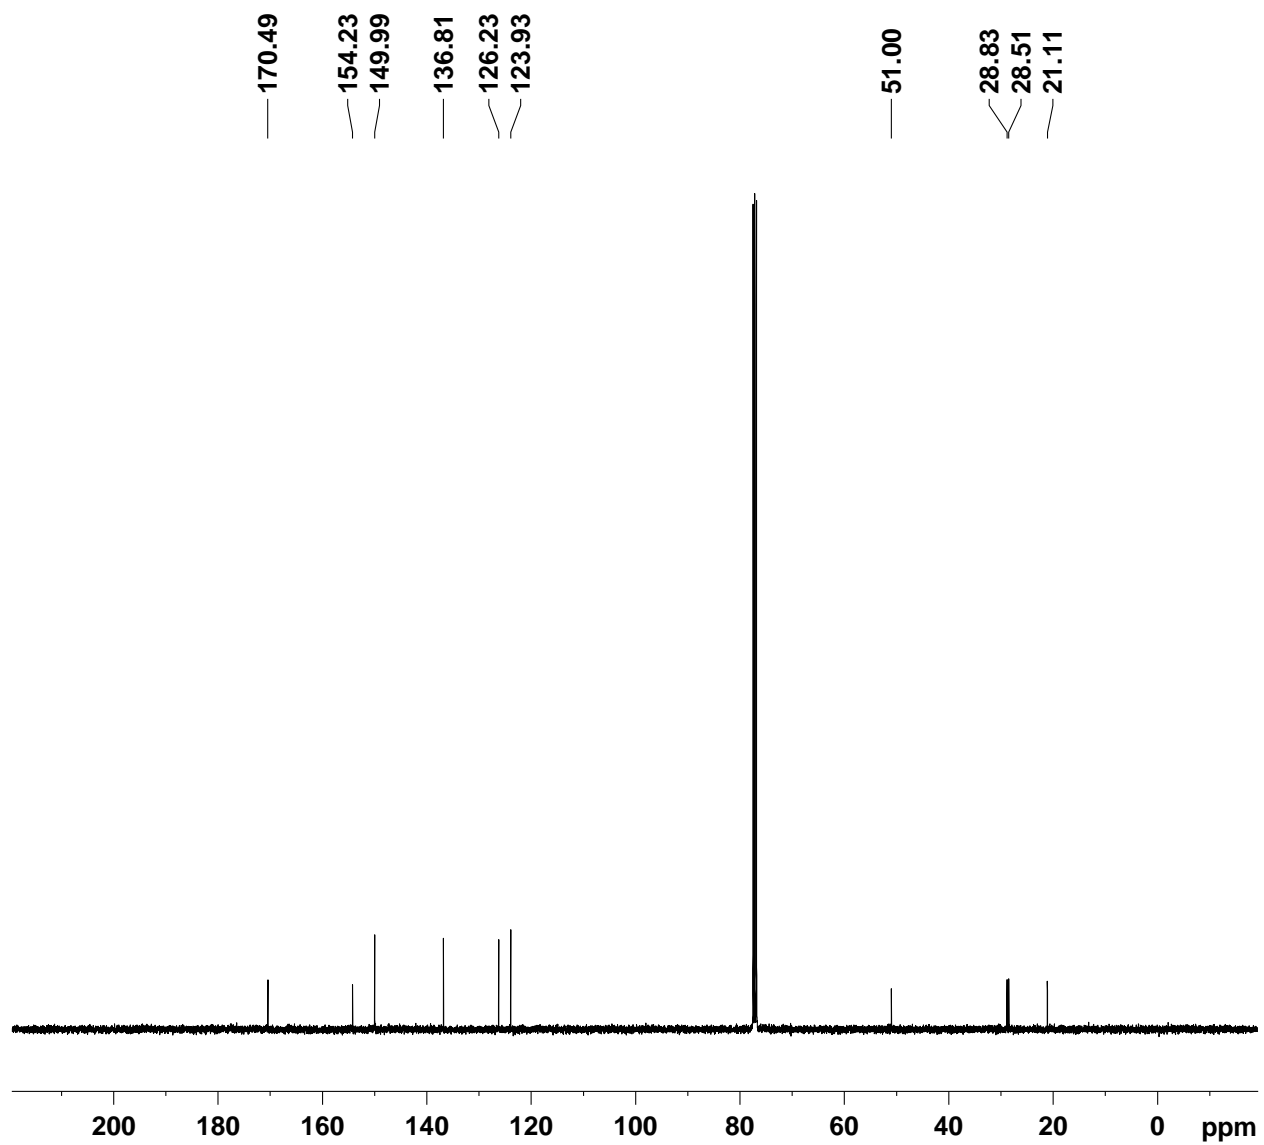

Figure S9.  $^{13}\text{C}$  NMR spectrum of *S,S'*-octyl-*bis*(Py<sub>2</sub>TTA) (**11**) in CDCl<sub>3</sub>.

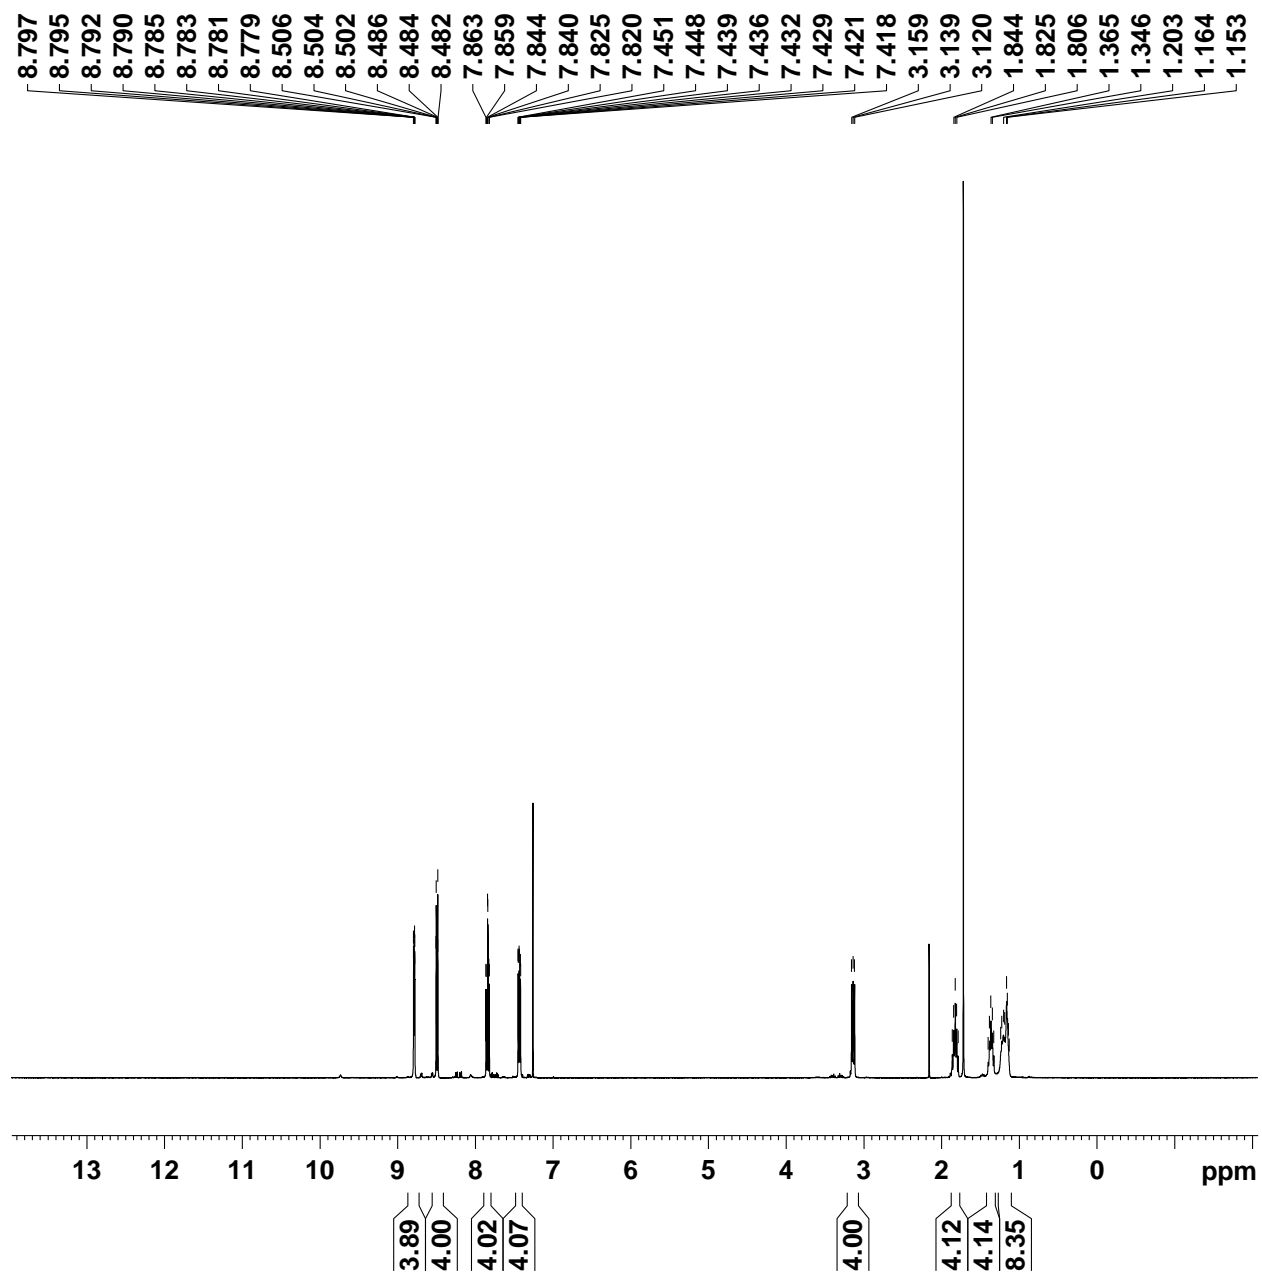

**Figure S10.**  $^1\text{H}$  NMR spectrum of *S,S'*-decyl-*bis*( $\text{Py}_2\text{TTA}$ ) (**12**) in  $\text{CDCl}_3$ .

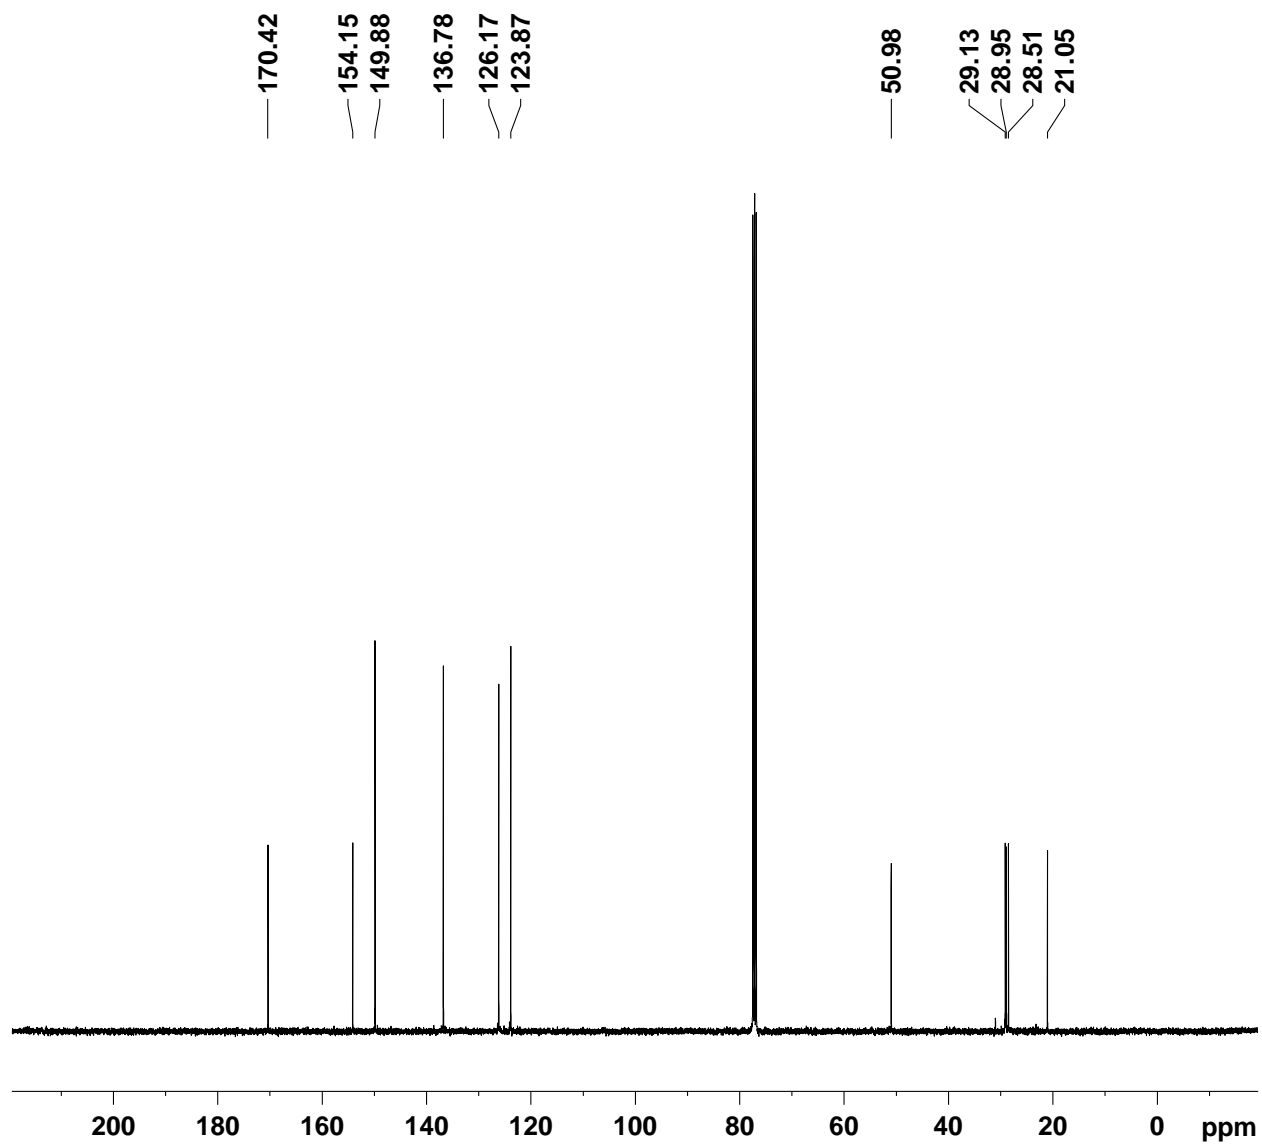

**Figure S11.**  $^{13}\text{C}$  NMR spectrum of *S,S'*-decyl-*bis*( $\text{Py}_2\text{TTA}$ ) (12) in  $\text{CDCl}_3$ .

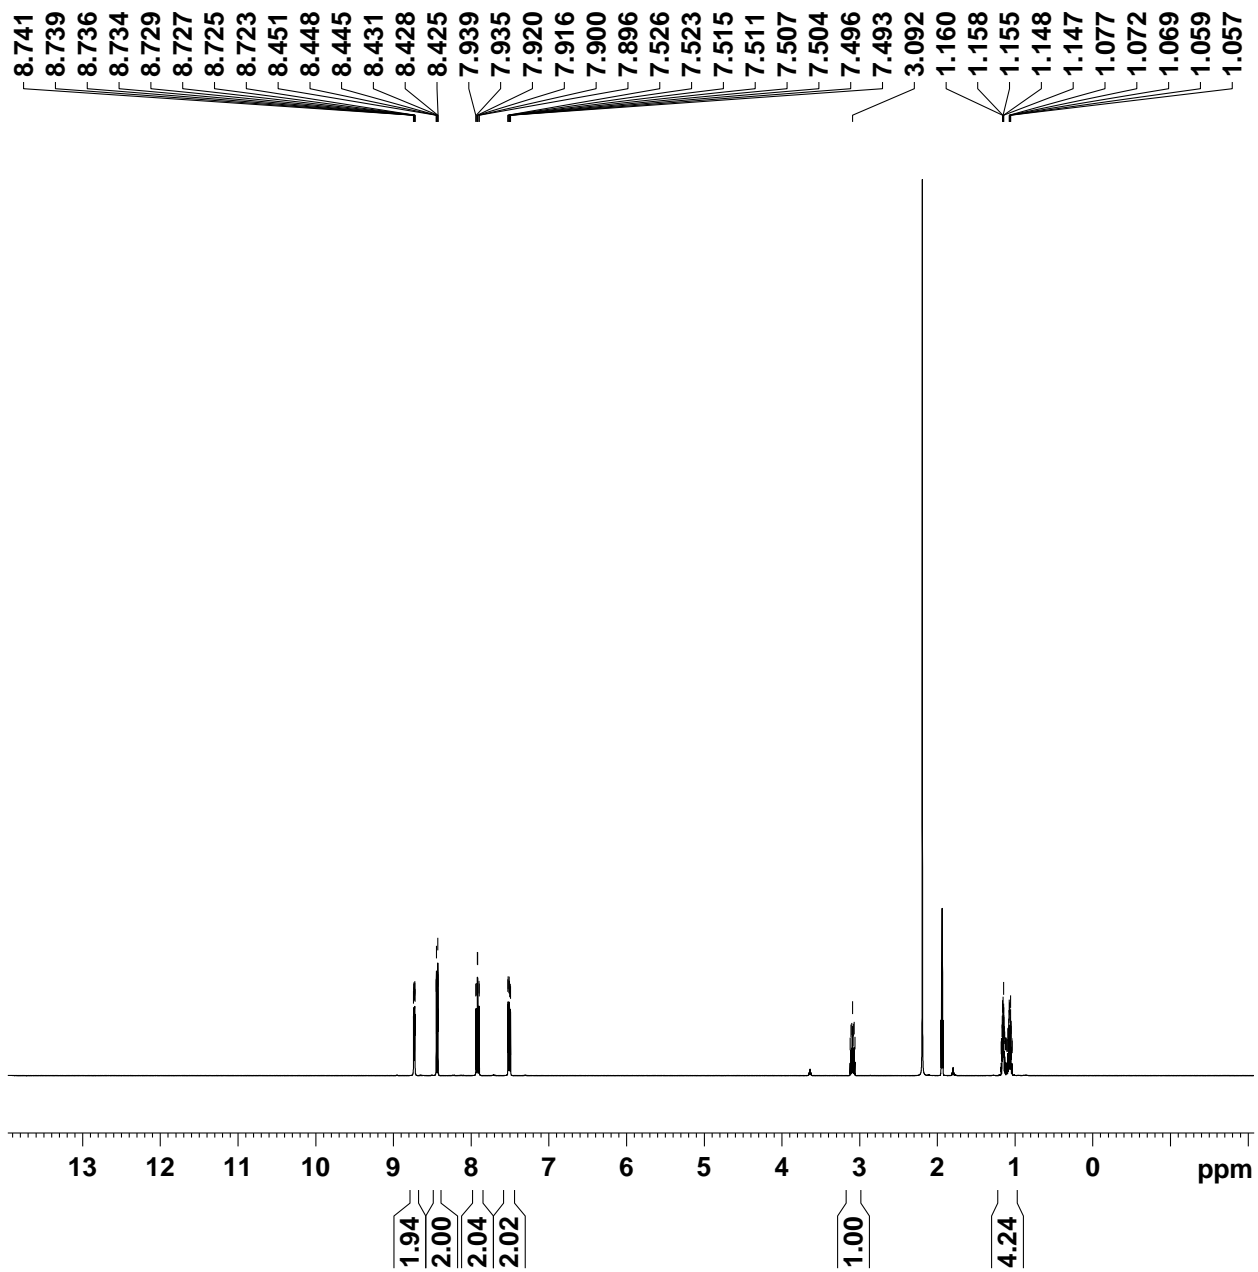

**Figure S12.**  $^1\text{H}$  NMR spectrum of *S*-cyclopropyl-Py<sub>2</sub>TTA (**13**) in CD<sub>3</sub>CN.

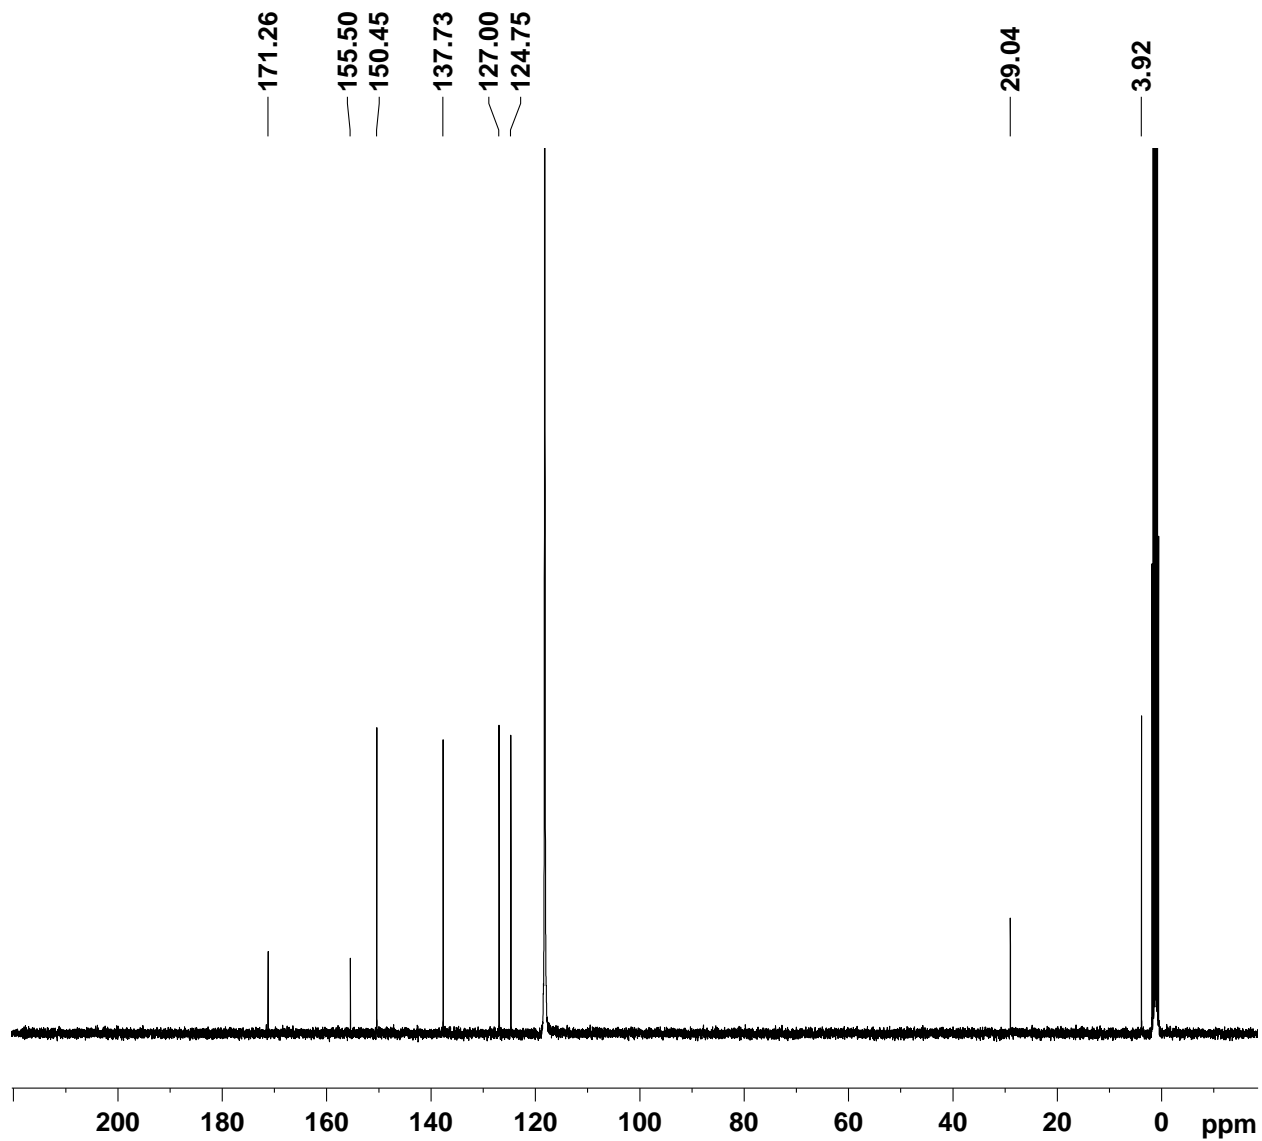

**Figure S13.**  $^{13}\text{C}$  NMR spectrum of *S*-cyclopropyl-Py<sub>2</sub>TTA (13) in CD<sub>3</sub>CN.

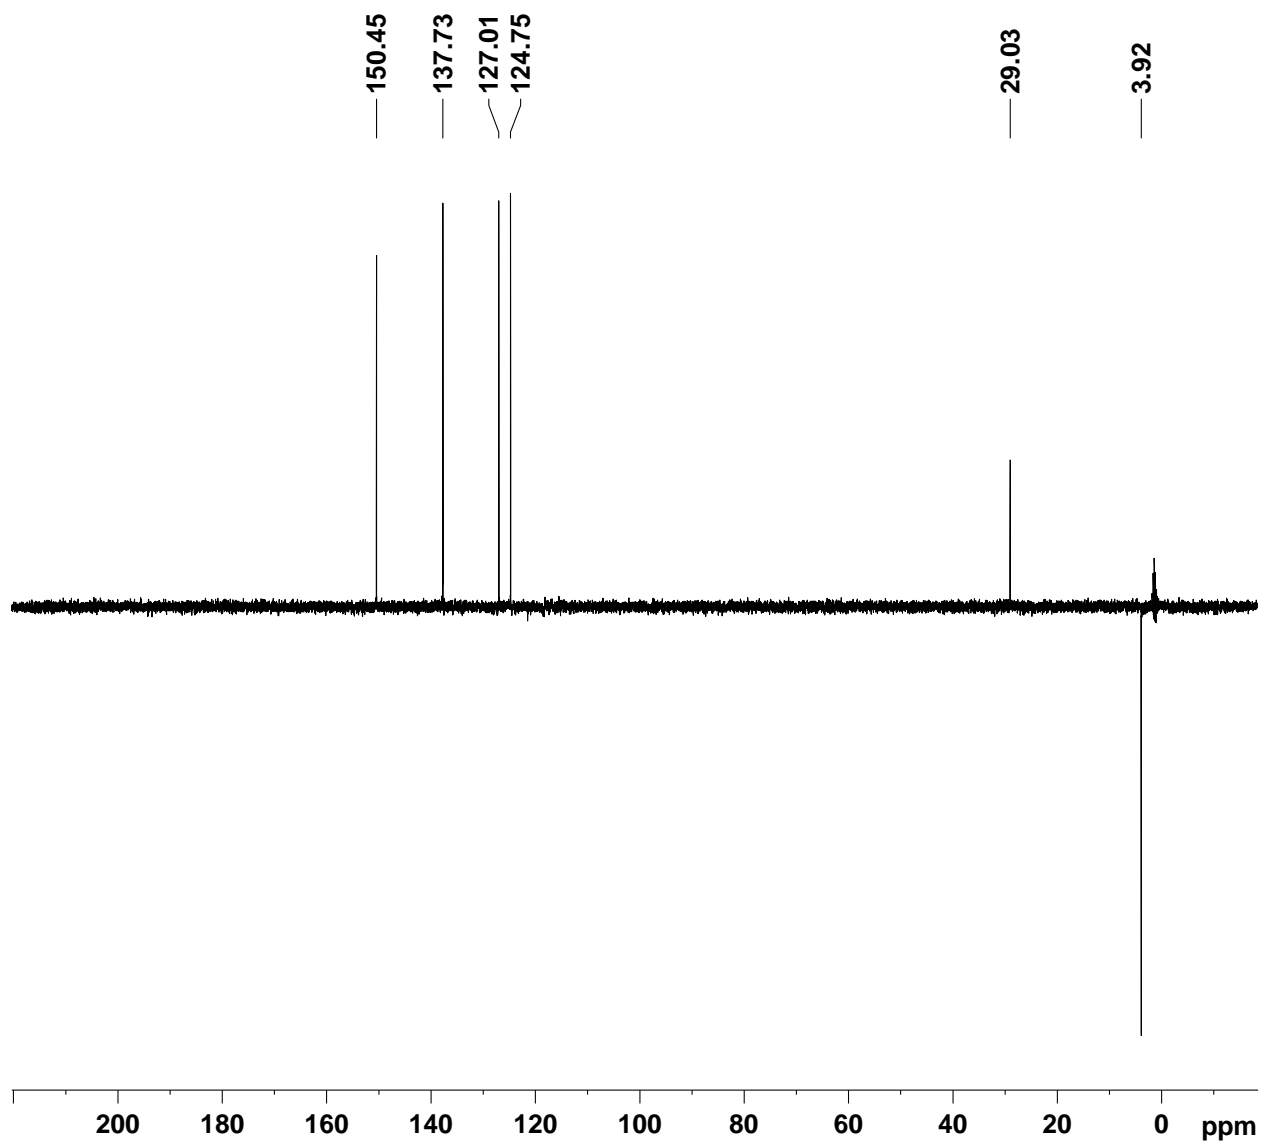

**Figure S14.** DEPT-135 spectrum of *S*-cyclopropyl-Py<sub>2</sub>TTA (13) in CD<sub>3</sub>CN.

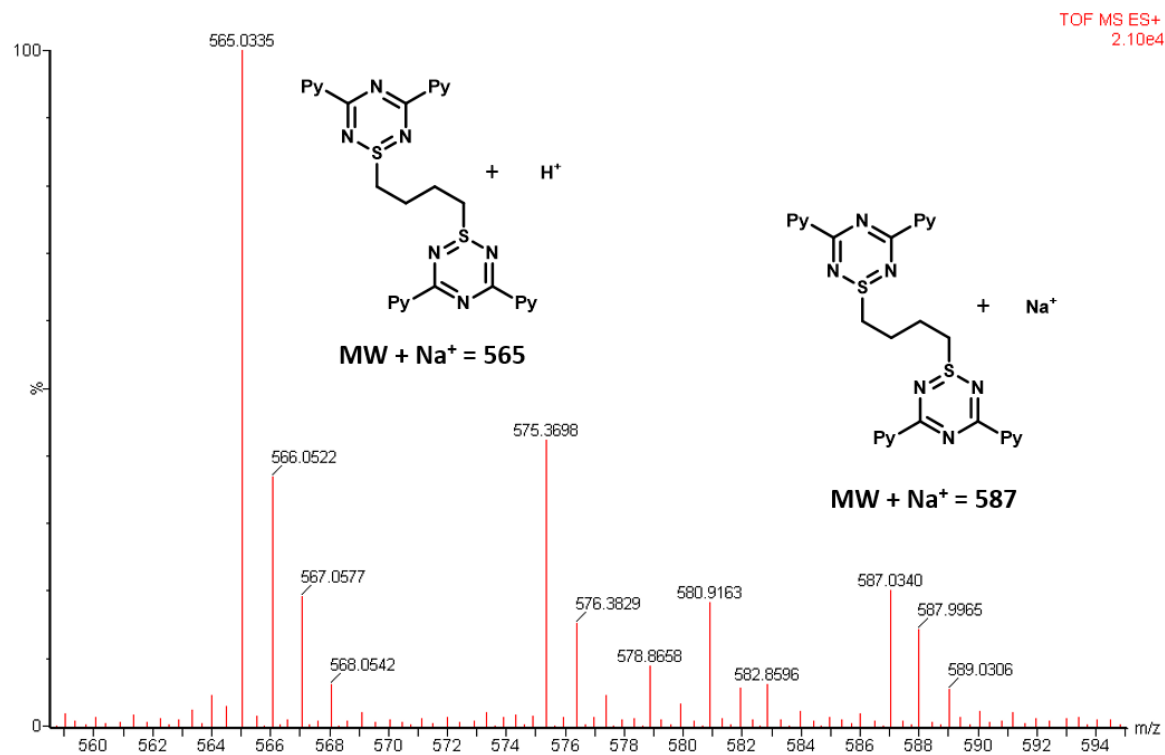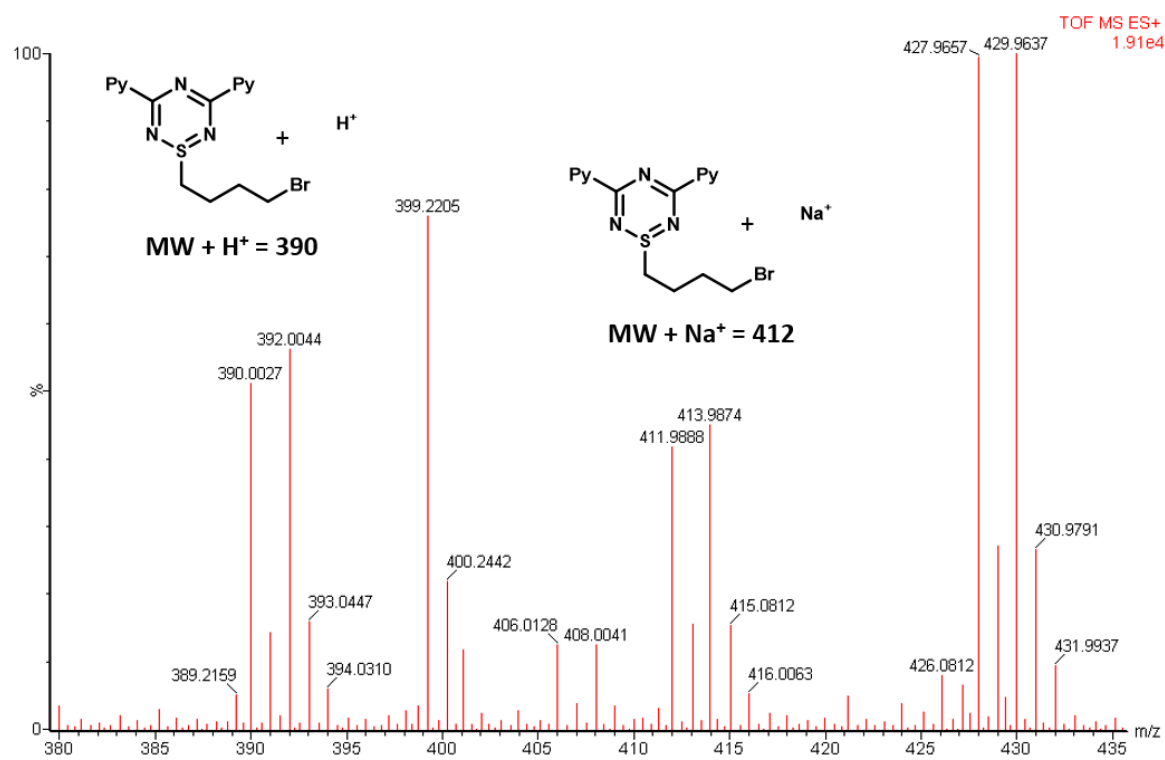

**Figure S15.** Mass to charge ratios of *S,S'*-butyl-*bis*(Py<sub>2</sub>TTA) (**8**) and mono-alkylated intermediate (**16**, where *n* = 4) from electron spray ionization mass spectrometry.



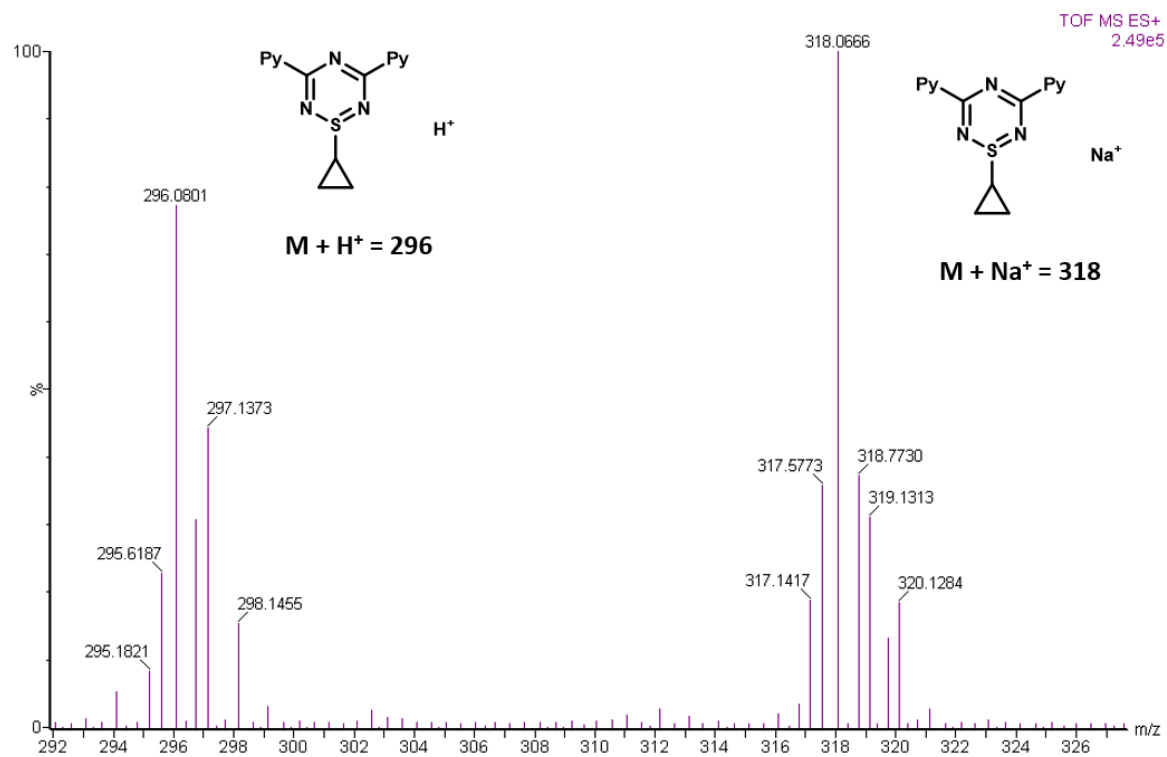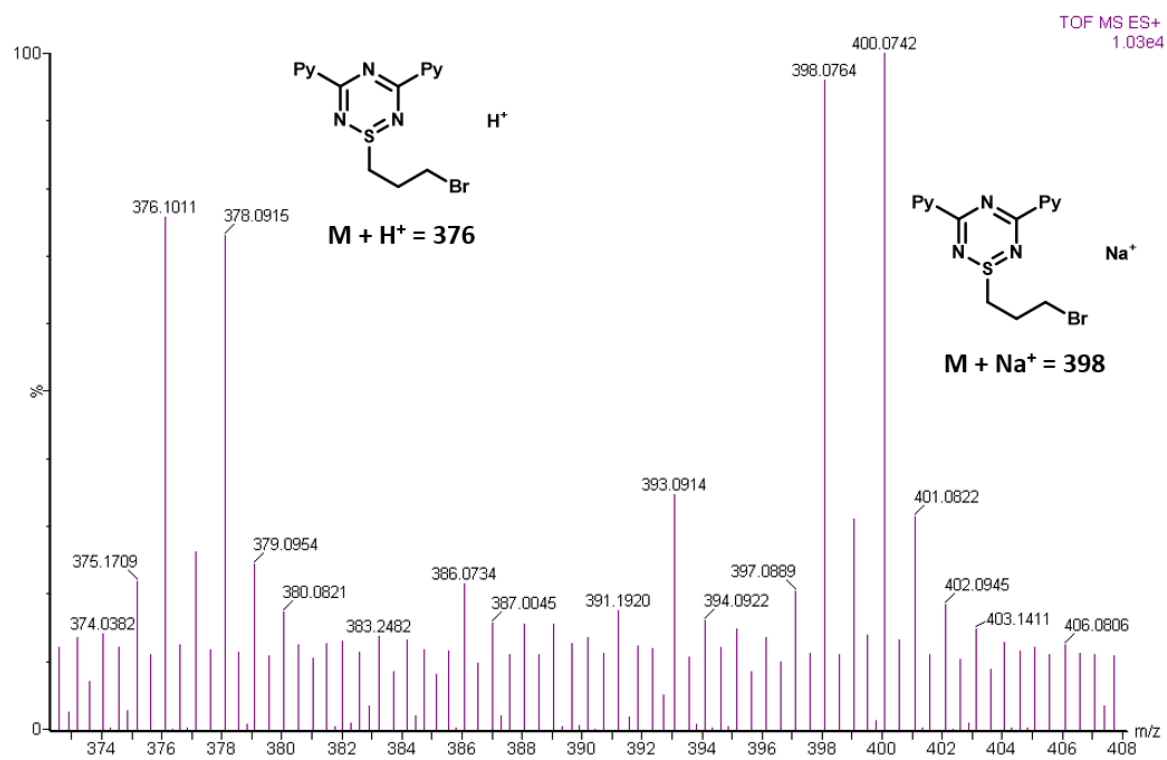

**Figure S16.** Mass to charge ratios of *S,S'*-cyclopropyl-Py<sub>2</sub>TTA (**13**) and mono-alkylated intermediate (**16**, where n = 3) from electron spray ionization mass spectrometry.

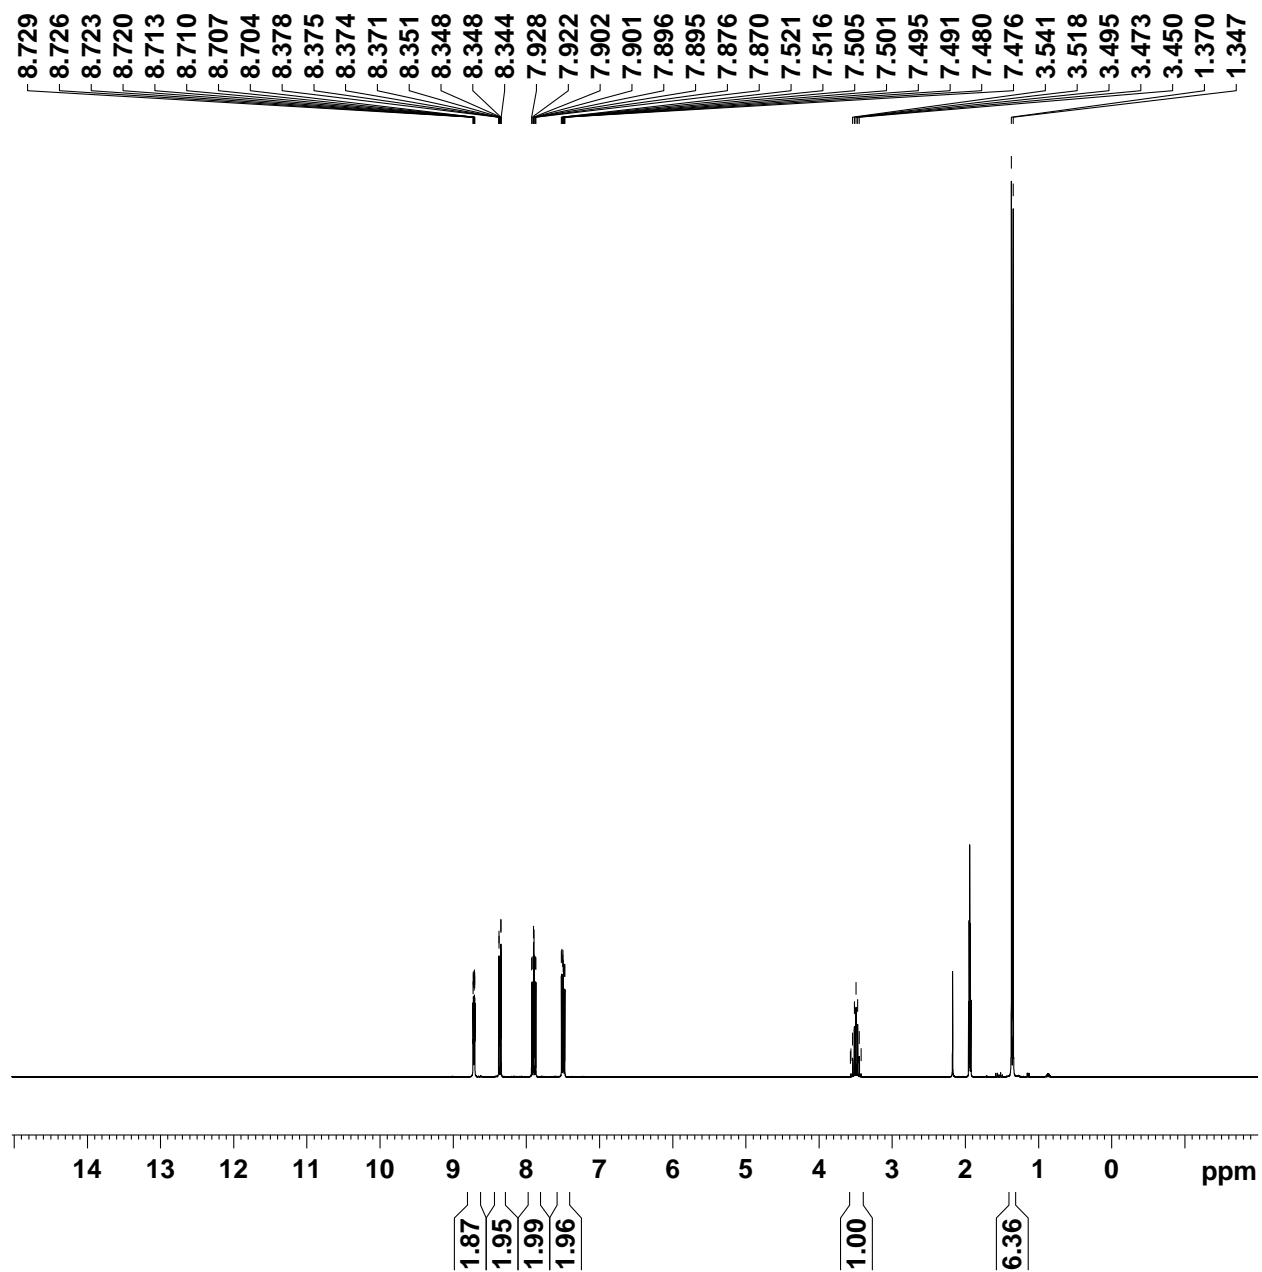

**Figure S17.**  $^1\text{H}$  NMR spectrum of *S*-isopropyl-Py<sub>2</sub>TTA (**6**) in CD<sub>3</sub>CN.

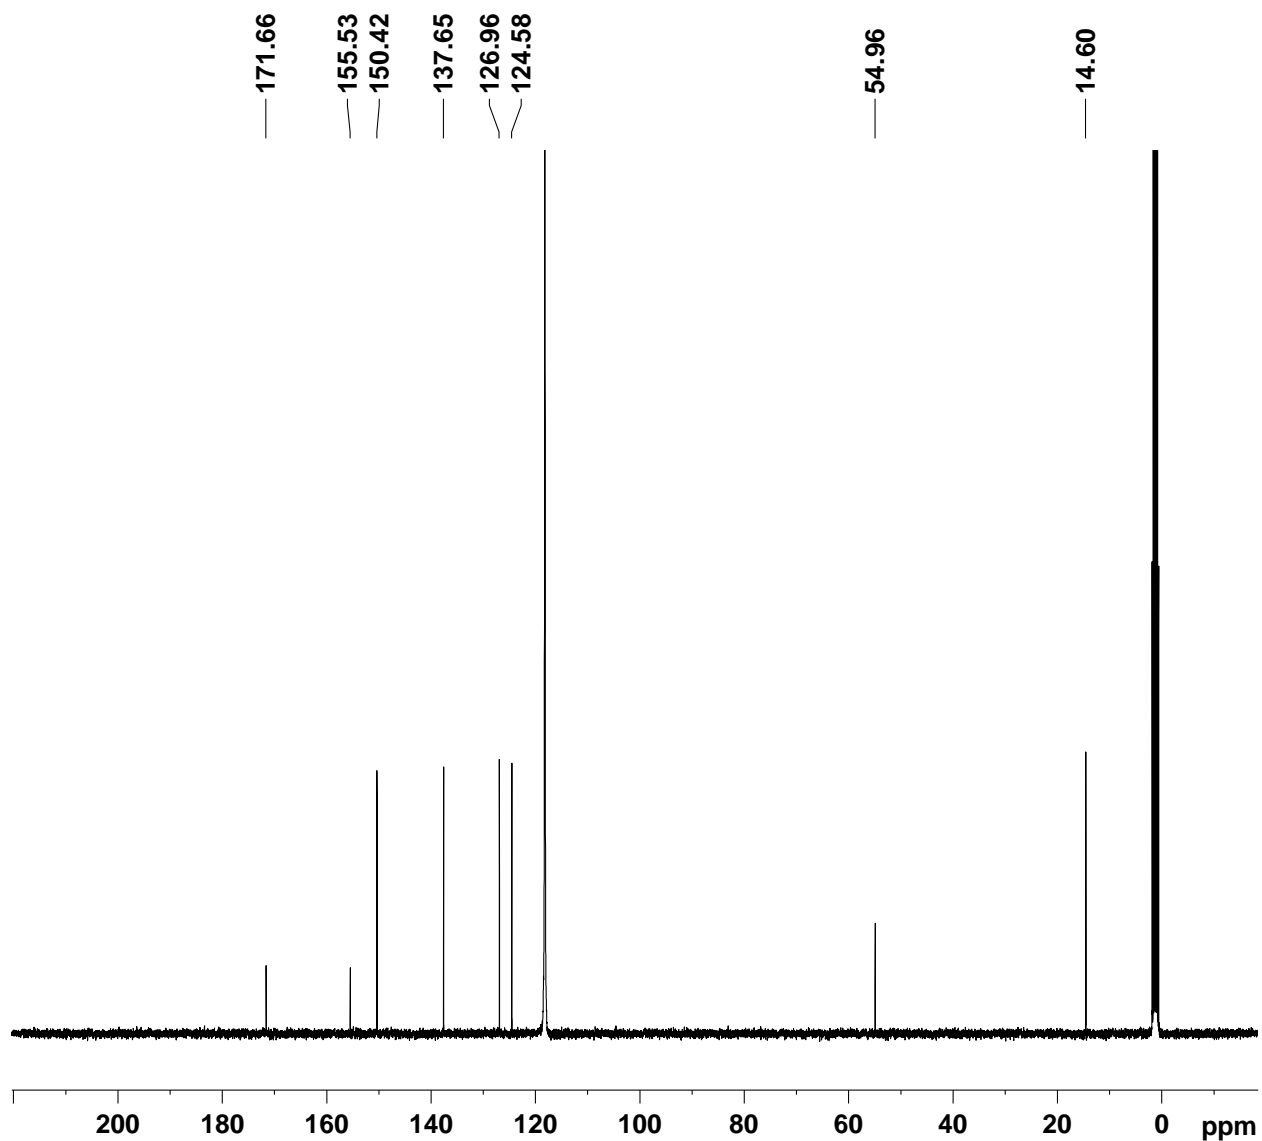

**Figure S18.**  $^{13}\text{C}$  NMR spectrum of *S*-isopropyl-Py<sub>2</sub>TTA (6) in CD<sub>3</sub>CN.

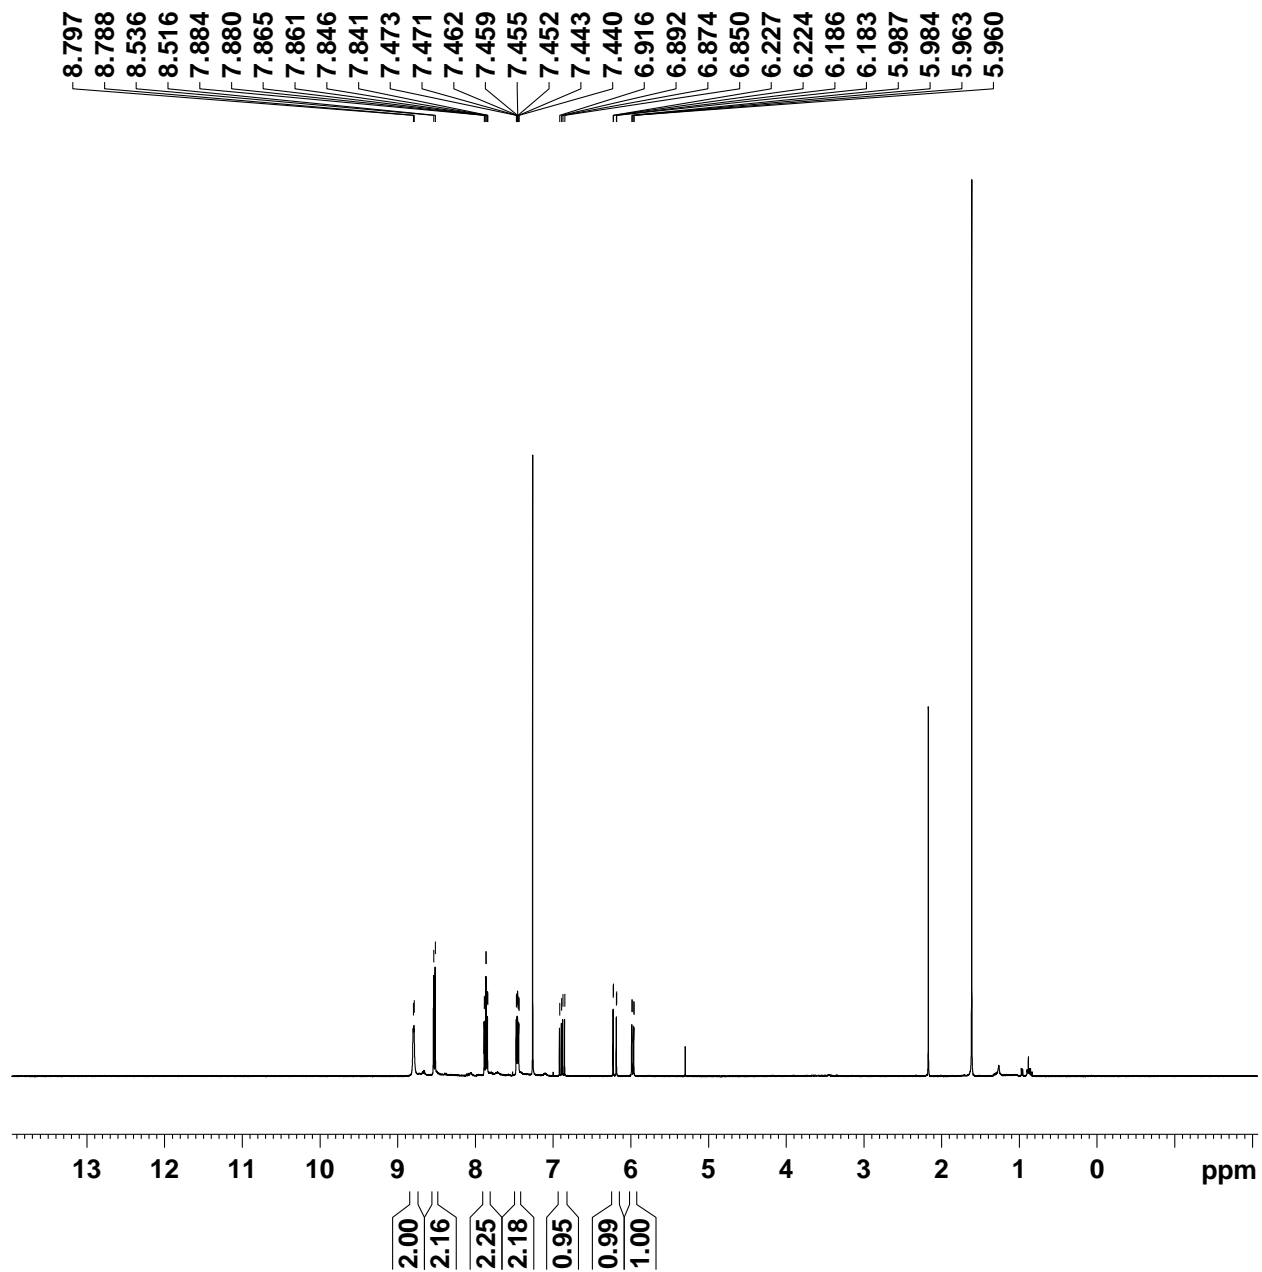

**Figure S19.**  $^1\text{H}$  NMR spectrum of *S*-ethenyl-Py<sub>2</sub>TTA (14) in  $\text{CDCl}_3$ .

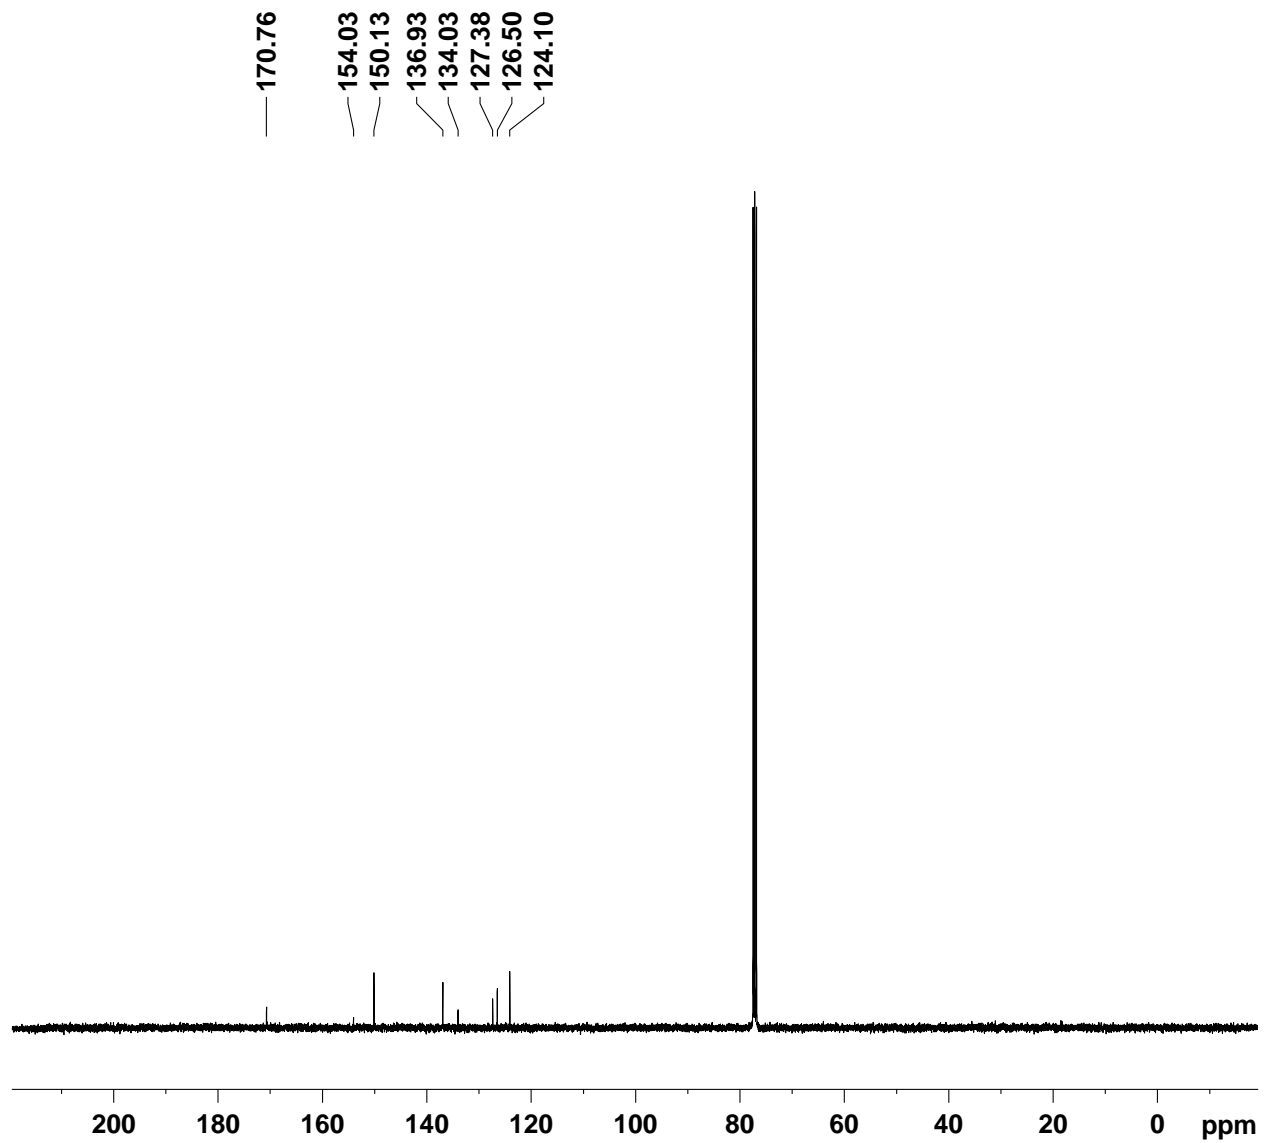

**Figure S20.**  $^{13}\text{C}$  NMR spectrum of *S*-ethenyl-Py<sub>2</sub>TTA (**14**) in CDCl<sub>3</sub>.

**Table S1.** Crystallographic data and selected collection parameters for **12** and **13**.

| Parameters                                                   | 12                                                                             | 13                                                               |
|--------------------------------------------------------------|--------------------------------------------------------------------------------|------------------------------------------------------------------|
| Empirical formula                                            | C <sub>36</sub> H <sub>40</sub> Cl <sub>4</sub> N <sub>10</sub> S <sub>2</sub> | C <sub>15</sub> H <sub>13</sub> N <sub>5</sub> S                 |
| Formula weight                                               | 818.7                                                                          | 295.36                                                           |
| Crystal system                                               | Monoclinic                                                                     | Monoclinic                                                       |
| a (Å)                                                        | 18.9919(12)                                                                    | 10.4365(14)                                                      |
| b (Å)                                                        | 14.2910(8)                                                                     | 15.482(2)                                                        |
| c (Å)                                                        | 16.4594(16)                                                                    | 9.3960(12)                                                       |
| α (°)                                                        | 90°                                                                            | 90°                                                              |
| β (°)                                                        | 122.227(3)°                                                                    | 110.589(1)°                                                      |
| γ (°)                                                        | 90°                                                                            | 90°                                                              |
| V (Å <sup>3</sup> )                                          | 3779.1(5)                                                                      | 1421.2(3)                                                        |
| T (K)                                                        | 200(2)                                                                         | 200(2)                                                           |
| Space group                                                  | <i>C</i> 2/ <i>c</i>                                                           | <i>P</i> 2 <sub>1</sub> / <i>c</i>                               |
| Z                                                            | 4                                                                              | 4                                                                |
| Wavelength                                                   | 0.71073 Å                                                                      | 0.71073 Å                                                        |
| Density (calculated)                                         | 1.439 g/cm <sup>3</sup>                                                        | 1.380 g/cm <sup>3</sup>                                          |
| Absorption coefficient                                       | 0.467 mm <sup>-1</sup>                                                         | 0.228 mm <sup>-1</sup>                                           |
| F(000)                                                       | 1704                                                                           | 616                                                              |
| Crystal size                                                 | 0.715 x 0.441 x 0.280 mm <sup>3</sup>                                          | 0.515 x 0.268 x 0.220 mm <sup>3</sup>                            |
| Theta range for data collection                              | 1.907 to 25.239°                                                               | 2.085 to 29.130°                                                 |
| Index ranges                                                 | -21 ≤ <i>h</i> ≤ 22, -17 ≤ <i>k</i> ≤ 14,<br>-18 ≤ <i>l</i> ≤ 19               | -14 ≤ <i>h</i> ≤ 14, -20 ≤ <i>k</i> ≤ 20,<br>-12 ≤ <i>l</i> ≤ 12 |
| Reflections collected                                        | 7805                                                                           | 17260                                                            |
| Independent reflections                                      | 3374 [ <i>R</i> <sub>int</sub> = 0.0381]                                       | 3627 [ <i>R</i> <sub>int</sub> = 0.0278]                         |
| Completeness to theta = 25.239°                              | 98.8 %                                                                         | 100.0 %                                                          |
| Absorption correction                                        | Semi-empirical from equivalents                                                | Semi-empirical from equivalents                                  |
| Max. and min. transmission                                   | 0.7461 and 0.6129                                                              | 0.7458 and 0.6963                                                |
| Data / restraints / parameters                               | 3374 / 17 / 245                                                                | 3627 / 0 / 190                                                   |
| Goodness-of-fit on <i>F</i> <sup>2</sup>                     | 1.079                                                                          | 1.034                                                            |
| Final <i>R</i> indices [ <i>I</i> > 2σ <sub><i>I</i></sub> ] | <i>R</i> <sub>1</sub> = 0.0872, <i>wR</i> <sub>2</sub> = 0.2195                | <i>R</i> <sub>1</sub> = 0.0418, <i>wR</i> <sub>2</sub> = 0.1088  |
| <i>R</i> indices (all data)                                  | <i>R</i> <sub>1</sub> = 0.1292, <i>wR</i> <sub>2</sub> = 0.2481                | <i>R</i> <sub>1</sub> = 0.0531, <i>wR</i> <sub>2</sub> = 0.1157  |
| Largest diff. peak and hole                                  | 0.756 and -0.608 e <sup>-</sup> Å <sup>-3</sup>                                | 0.305 and -0.203 e <sup>-</sup> Å <sup>-3</sup>                  |

## Computation Study

### Conformational Analysis

To locate the lowest energy conformations of the mono-alkylated intermediates corresponding to compound **16** ( $n = 3, 4$ ), a molecular mechanics conformational search was performed using Avagadro v1.1.1.<sup>1</sup> All searches started with the fully extended linear chains (all C-C bonds anti-periplanar). The conformational sampling was carried out using MMFF94 and a systematic rotor search.<sup>2</sup> All conformations that were within 3 kcal/mol of the global minimum were fully optimized in Gaussian09 using B3LYP/6-31G(d) to ensure the global minima were correctly assigned.<sup>3</sup>

### Reaction of second conformation of bromopropyl anion

Deprotonation of **B** leads directly to a conformation of the bromopropyl anion **D1** that is also capable of directly undergoing cyclization (Figure S21). This conformation (**D1**) is 1.2 kcal/mol higher in energy than the lowest energy conformer **D**. The cyclization of this conformer occurs with a barrier of 12.9 kcal/mol. This suggest that cyclization of the bromopropyl anion can occur without any change in conformation and while the transition state from this conformation is higher in energy than that leading from the lowest energy conformation of the anion, it is still 3 kcal/mol lower in energy than the intermolecular substitution.

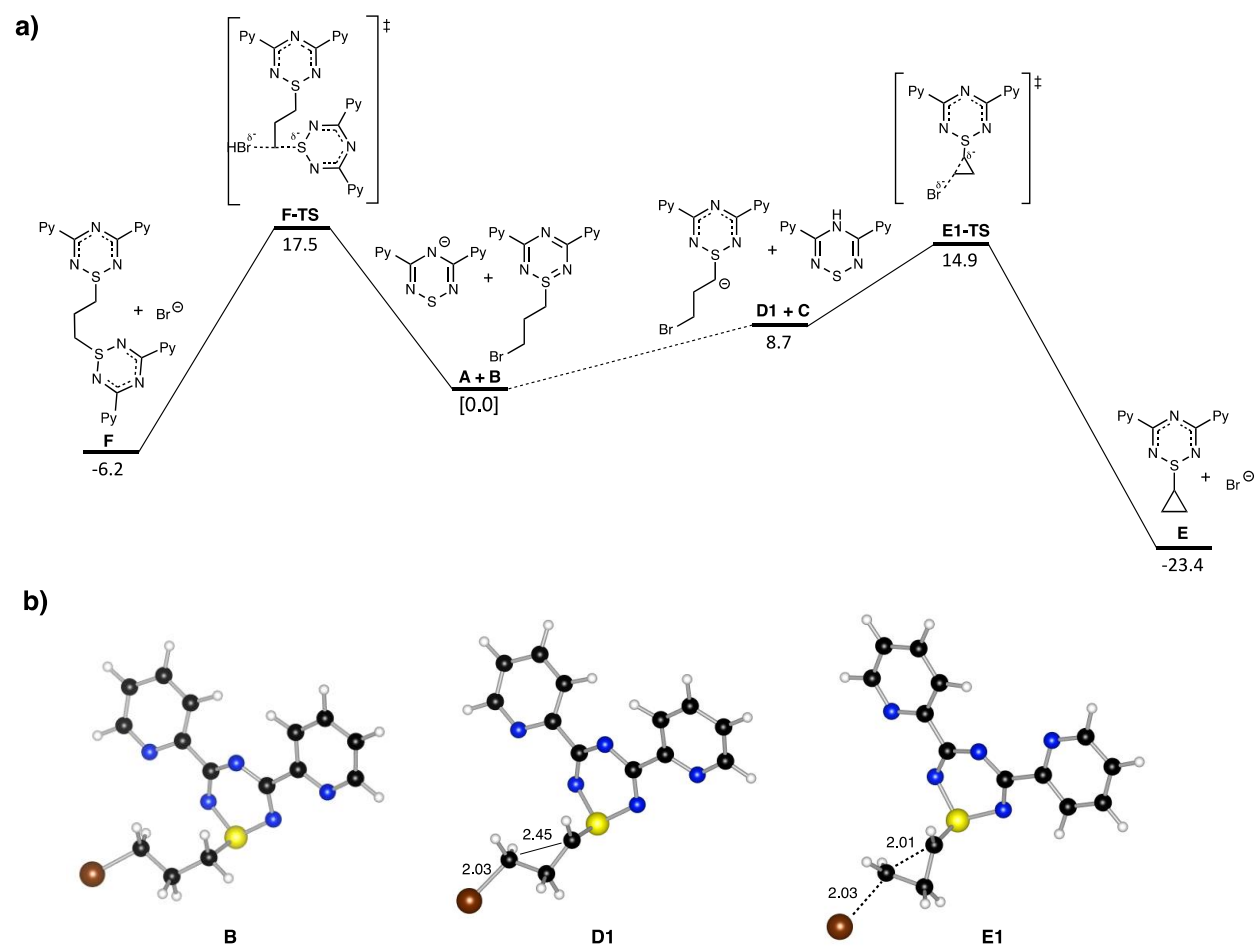

**Figure S21.** a) Intra- and intermolecular substitution paths for a second conformation of the bromopropyl anion **D1**. Reported values are free energies at 298K and are reported in kcal/mol. Energies for the intramolecular pathways include the energy of **Py<sub>2</sub>TTAH** (**C**). b) Structures associated with the cyclization pathway. Distances reported in Angstroms.



## Energies and Reaction Coordinates

A

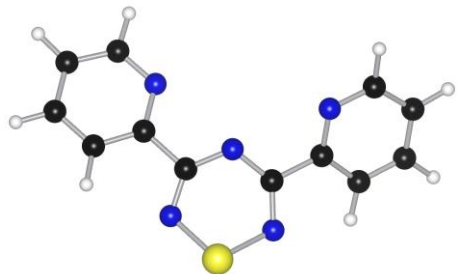

HF (B3LYP/6-31+G(d,p)) = -1134.086189 Hartrees

HF (M062X/6-31+G(d,p)//B3LYP/6-31+G(d,p)) = -1133.830906 Hartrees

Imaginary Frequencies: none found

Zero-point correction = 0.18342 (Hartree/Particle)

Thermal correction = 0.139036 Hartrees

Coordinates from last standard orientation:

| Center Number | Atomic Number | Atomic Type | Coordinates (Angstroms) |           |           |
|---------------|---------------|-------------|-------------------------|-----------|-----------|
|               |               |             | X                       | Y         | Z         |
| 1             | 7             | 0           | 1.353696                | 1.939420  | 0.124416  |
| 2             | 6             | 0           | 1.147595                | 0.677916  | -0.174382 |
| 3             | 6             | 0           | -1.160222               | 0.644716  | -0.140339 |
| 4             | 7             | 0           | -1.400380               | 1.904364  | 0.142219  |
| 5             | 16            | 0           | -0.038853               | 2.945946  | -0.170780 |
| 6             | 7             | 0           | -0.002517               | 0.024217  | -0.493061 |
| 7             | 6             | 0           | 2.390160                | -0.176508 | -0.076956 |
| 8             | 6             | 0           | 3.484877                | 0.264962  | 0.694097  |
| 9             | 6             | 0           | 3.531588                | -2.084306 | -0.670071 |
| 10            | 6             | 0           | 4.621323                | -0.530791 | 0.783300  |
| 11            | 1             | 0           | 3.407186                | 1.220667  | 1.198582  |
| 12            | 1             | 0           | 3.518435                | -3.013476 | -1.240852 |
| 13            | 1             | 0           | 5.468976                | -0.213547 | 1.386829  |
| 14            | 6             | 0           | -2.377881               | -0.239538 | 0.002563  |
| 15            | 6             | 0           | -3.662358               | 0.338156  | -0.070034 |
| 16            | 6             | 0           | -3.298518               | -2.327238 | 0.304818  |
| 17            | 6             | 0           | -4.785065               | -0.471888 | 0.053033  |
| 18            | 1             | 0           | -3.737280               | 1.409136  | -0.215722 |
| 19            | 1             | 0           | -3.113502               | -3.391279 | 0.456336  |
| 20            | 1             | 0           | -5.783019               | -0.042614 | -0.003168 |
| 21            | 6             | 0           | 4.654743                | -1.742673 | 0.084551  |
| 22            | 1             | 0           | 5.519369                | -2.400411 | 0.120718  |
| 23            | 6             | 0           | -4.607390               | -1.846516 | 0.246429  |
| 24            | 1             | 0           | -5.451589               | -2.523943 | 0.346244  |
| 25            | 7             | 0           | 2.423276                | -1.338803 | -0.750061 |
| 26            | 7             | 0           | -2.208367               | -1.560257 | 0.185267  |

**B**

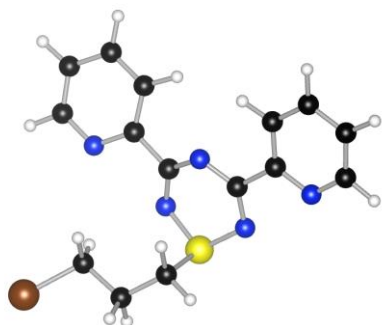

HF (B3LYP/6-31+G(d,p)) = -3823.686609 Hartrees

HF (M062X/6-31+G(d,p)//B3LYP/6-31+G(d,p)) = -3823.3798886 Hartrees

Imaginary Frequencies: none found

Zero-point correction = 0.272013 (Hartree/Particle)

Thermal correction = 0.219264 Hartrees

Coordinates from last standard orientation:

| Center Number | Atomic Number | Atomic Type | Coordinates (Angstroms) |           |           |
|---------------|---------------|-------------|-------------------------|-----------|-----------|
|               |               |             | X                       | Y         | Z         |
| 1             | 7             | 0           | -1.764057               | -1.595935 | 1.058787  |
| 2             | 6             | 0           | -2.175672               | -0.567877 | 0.332807  |
| 3             | 6             | 0           | -0.319346               | 0.822647  | 0.578658  |
| 4             | 7             | 0           | 0.397639                | 0.056763  | 1.395156  |
| 5             | 16            | 0           | -0.119419               | -1.542102 | 1.425968  |
| 6             | 7             | 0           | -1.492520               | 0.549002  | -0.027307 |
| 7             | 6             | 0           | -3.609673               | -0.616550 | -0.119359 |
| 8             | 6             | 0           | -5.512723               | 0.412355  | -1.173148 |
| 9             | 6             | 0           | -5.563603               | -1.809296 | -0.277284 |
| 10            | 1             | 0           | -5.982403               | 1.252994  | -1.675671 |
| 11            | 1             | 0           | -6.083395               | -2.742697 | -0.069840 |
| 12            | 6             | 0           | 0.231052                | 2.199950  | 0.346033  |
| 13            | 6             | 0           | -0.077576               | 4.526335  | -0.176703 |
| 14            | 6             | 0           | 2.073410                | 3.566885  | 0.272171  |
| 15            | 1             | 0           | -0.715834               | 5.370044  | -0.422619 |
| 16            | 1             | 0           | 3.153755                | 3.650363  | 0.370526  |
| 17            | 6             | 0           | -6.225670               | -0.759142 | -0.923421 |
| 18            | 1             | 0           | -7.264232               | -0.865657 | -1.221086 |
| 19            | 6             | 0           | 1.301454                | 4.688922  | -0.045885 |
| 20            | 1             | 0           | 1.773538                | 5.655960  | -0.188507 |
| 21            | 6             | 0           | 0.601988                | -2.243467 | -0.135431 |
| 22            | 6             | 0           | 2.134286                | -2.322411 | -0.130960 |
| 23            | 1             | 0           | 0.213328                | -1.647216 | -0.966484 |
| 24            | 1             | 0           | 0.157409                | -3.243002 | -0.185557 |
| 25            | 6             | 0           | 2.809303                | -0.968079 | -0.325223 |
| 26            | 1             | 0           | 2.493645                | -2.796190 | 0.790124  |
| 27            | 1             | 0           | 2.421121                | -2.988110 | -0.952802 |
| 28            | 1             | 0           | 2.433633                | -0.454047 | -1.210427 |
| 29            | 1             | 0           | 2.716056                | -0.302708 | 0.529504  |
| 30            | 35            | 0           | 4.737665                | -1.199824 | -0.643325 |
| 31            | 6             | 0           | -0.625249               | 3.258913  | 0.015382  |
| 32            | 1             | 0           | -1.688189               | 3.075201  | -0.078463 |
| 33            | 6             | 0           | -4.181526               | 0.489016  | -0.765314 |
| 34            | 1             | 0           | -3.580027               | 1.371745  | -0.938524 |
| 35            | 7             | 0           | 1.560325                | 2.349274  | 0.470213  |
| 36            | 7             | 0           | -4.289775               | -1.750306 | 0.115546  |

-----  
**B1 (conformation leading directly to D)**

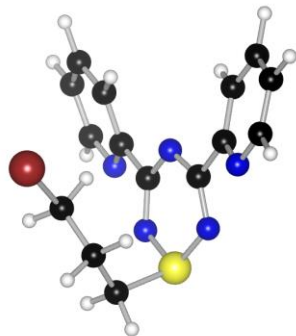

HF (B3LYP/6-31+G(d,p)) = -3823.684044 Hartrees

HF (M062X/6-31+G(d,p)//B3LYP/6-31+G(d,p)) = -3823.3781037 Hartrees

Imaginary Frequencies: none found

Zero point correction = 0.272014 (Hartree/Particle)

Thermal correction = 0.220059 Hartrees

Coordinates from last standard orientation:

-----

| Center<br>Number | Atomic<br>Number | Atomic<br>Type | Coordinates (Angstroms) |           |           |
|------------------|------------------|----------------|-------------------------|-----------|-----------|
|                  |                  |                | X                       | Y         | Z         |
| 1                | 7                | 0              | 1.045393                | -0.650522 | 2.068753  |
| 2                | 6                | 0              | 0.788544                | -1.114804 | 0.852700  |
| 3                | 6                | 0              | -1.496220               | -0.629889 | 0.747525  |
| 4                | 7                | 0              | -1.636934               | -0.004085 | 1.901863  |
| 5                | 16               | 0              | -0.212309               | 0.197428  | 2.790739  |
| 6                | 7                | 0              | -0.375963               | -1.127986 | 0.168640  |
| 7                | 6                | 0              | 1.948615                | -1.760811 | 0.150144  |
| 8                | 6                | 0              | 2.809773                | -3.265713 | -1.514954 |
| 9                | 6                | 0              | 4.220738                | -1.981496 | -0.062884 |
| 10               | 1                | 0              | 2.662478                | -3.985203 | -2.315159 |
| 11               | 1                | 0              | 5.205680                | -1.674279 | 0.283059  |
| 12               | 6                | 0              | -2.752863               | -0.802276 | -0.058504 |
| 13               | 6                | 0              | -3.842530               | -1.112476 | -2.180013 |
| 14               | 6                | 0              | -5.042683               | -0.901341 | -0.116051 |
| 15               | 1                | 0              | -3.807314               | -1.241413 | -3.257903 |
| 16               | 1                | 0              | -5.973002               | -0.873432 | 0.447901  |
| 17               | 6                | 0              | 4.093159                | -2.912961 | -1.098918 |
| 18               | 1                | 0              | 4.976600                | -3.341596 | -1.561882 |
| 19               | 6                | 0              | -5.061392               | -1.079094 | -1.503761 |
| 20               | 1                | 0              | -6.004817               | -1.186453 | -2.030041 |
| 21               | 6                | 0              | 0.225757                | 1.989921  | 2.475638  |
| 22               | 6                | 0              | 0.985880                | 2.331571  | 1.190589  |
| 23               | 1                | 0              | 0.830761                | 2.253377  | 3.349150  |
| 24               | 1                | 0              | -0.741636               | 2.498352  | 2.559552  |
| 25               | 6                | 0              | 0.144101                | 2.260572  | -0.075463 |
| 26               | 1                | 0              | 1.359767                | 3.354946  | 1.313817  |
| 27               | 1                | 0              | 1.864044                | 1.684548  | 1.098687  |
| 28               | 1                | 0              | -0.133171               | 1.247919  | -0.351436 |
| 29               | 1                | 0              | -0.745356               | 2.888208  | -0.019059 |
| 30               | 35               | 0              | 1.155277                | 2.931486  | -1.627532 |
| 31               | 7                | 0              | -3.922977               | -0.757081 | 0.597187  |
| 32               | 7                | 0              | 3.181064                | -1.417244 | 0.556520  |
| 33               | 6                | 0              | -2.663994               | -0.975754 | -1.447611 |
| 34               | 1                | 0              | -1.690903               | -0.999135 | -1.922653 |
| 35               | 6                | 0              | 1.714698                | -2.675887 | -0.885535 |

-----

36 1 0 0.695545 -2.905653 -1.170398

C

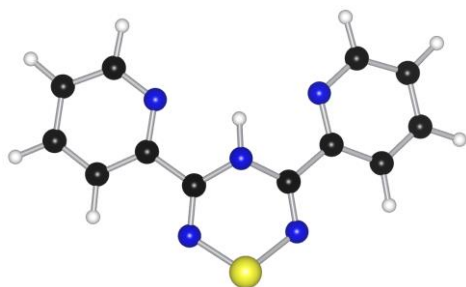

HF (B3LYP/6-31+G(d,p)) = -1134.6646995 Hartrees

HF (M062X/6-31+G(d,p)//B3LYP/6-31+G(d,p)) = -1134.3367957 Hartrees

Imaginary Frequencies: none found

Zero point correction = 0.198665 (Hartree/Particle)

Thermal correction = 0.156254 Hartrees

Coordinates from last standard orientation:

| Center<br>Number | Atomic<br>Number | Atomic<br>Type | Coordinates (Angstroms) |           |           |
|------------------|------------------|----------------|-------------------------|-----------|-----------|
|                  |                  |                | X                       | Y         | Z         |
| 1                | 7                | 0              | 1.369993                | 2.029866  | 0.079119  |
| 2                | 6                | 0              | 1.207247                | 0.780002  | -0.171120 |
| 3                | 6                | 0              | -1.207253               | 0.780062  | -0.171193 |
| 4                | 7                | 0              | -1.369941               | 2.029913  | 0.079047  |
| 5                | 16               | 0              | 0.000098                | 3.054907  | -0.120160 |
| 6                | 7                | 0              | 0.000030                | 0.202203  | -0.584158 |
| 7                | 6                | 0              | 2.355477                | -0.156814 | -0.027201 |
| 8                | 6                | 0              | 3.629792                | 0.312371  | 0.324034  |
| 9                | 6                | 0              | 3.098401                | -2.329035 | -0.159127 |
| 10               | 6                | 0              | 4.664868                | -0.610600 | 0.432385  |
| 11               | 1                | 0              | 3.777377                | 1.370855  | 0.502773  |
| 12               | 1                | 0              | 2.848300                | -3.368192 | -0.359759 |
| 13               | 1                | 0              | 5.664300                | -0.283775 | 0.703812  |
| 14               | 6                | 0              | -2.355483               | -0.156757 | -0.027242 |
| 15               | 6                | 0              | -3.629669               | 0.312395  | 0.324484  |
| 16               | 6                | 0              | -3.098632               | -2.328871 | -0.159800 |
| 17               | 6                | 0              | -4.664785               | -0.610542 | 0.432829  |
| 18               | 1                | 0              | -3.777146               | 1.370834  | 0.503583  |
| 19               | 1                | 0              | -2.848676               | -3.367981 | -0.360857 |
| 20               | 1                | 0              | -5.664105               | -0.283728 | 0.704677  |
| 21               | 6                | 0              | 4.399234                | -1.961588 | 0.187427  |
| 22               | 1                | 0              | 5.178797                | -2.712952 | 0.261519  |
| 23               | 6                | 0              | -4.399325               | -1.961461 | 0.187330  |
| 24               | 1                | 0              | -5.178894               | -2.712815 | 0.261457  |
| 25               | 7                | 0              | 2.093203                | -1.451691 | -0.266446 |
| 26               | 7                | 0              | -2.093394               | -1.451572 | -0.267051 |
| 27               | 1                | 0              | 0.000017                | -0.816774 | -0.615052 |

**D**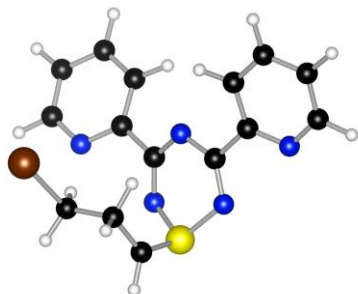

HF (B3LYP/6-31+G(d,p)) = -3823.1183083 Hartrees

HF (M062X/6-31+G(d,p)//B3LYP/6-31+G(d,p)) = -3822.8687052 Hartrees

Imaginary Frequencies: none found

Zero point correction = 0.257261 (Hartree/Particle)

Thermal correction = 0.204351 Hartrees

Coordinates from last standard orientation:

| Center<br>Number | Atomic<br>Number | Atomic<br>Type | Coordinates (Angstroms) |           |           |
|------------------|------------------|----------------|-------------------------|-----------|-----------|
|                  |                  |                | X                       | Y         | Z         |
| 1                | 7                | 0              | -1.957029               | -0.641792 | 1.769706  |
| 2                | 6                | 0              | -1.891316               | 0.083824  | 0.673279  |
| 3                | 6                | 0              | 0.199947                | 1.025837  | 1.005683  |
| 4                | 7                | 0              | 0.463999                | 0.501205  | 2.186022  |
| 5                | 16               | 0              | -0.453424               | -0.927688 | 2.587538  |
| 6                | 7                | 0              | -0.872122               | 0.844831  | 0.198244  |
| 7                | 6                | 0              | -3.128473               | 0.117300  | -0.190867 |
| 8                | 6                | 0              | -4.164543               | 0.563017  | -2.326841 |
| 9                | 6                | 0              | -5.385978               | -0.247477 | -0.438158 |
| 10               | 1                | 0              | -4.103091               | 0.881790  | -3.364824 |
| 11               | 1                | 0              | -6.315086               | -0.567682 | 0.033923  |
| 12               | 6                | 0              | 1.199064                | 2.024415  | 0.485840  |
| 13               | 6                | 0              | 1.702784                | 4.018941  | -0.776225 |
| 14               | 6                | 0              | 3.383364                | 2.731646  | 0.339340  |
| 15               | 1                | 0              | 1.390444                | 4.861953  | -1.388241 |
| 16               | 1                | 0              | 4.423204                | 2.541050  | 0.603885  |
| 17               | 6                | 0              | -5.382820               | 0.157719  | -1.775042 |
| 18               | 1                | 0              | -6.300538               | 0.152328  | -2.356944 |
| 19               | 6                | 0              | 3.048590                | 3.838617  | -0.443280 |
| 20               | 1                | 0              | 3.817699                | 4.525716  | -0.785267 |
| 21               | 6                | 0              | 0.270842                | -2.259102 | 1.891918  |
| 22               | 6                | 0              | 0.666986                | -2.405191 | 0.449637  |
| 23               | 1                | 0              | 0.579699                | -2.997345 | 2.625674  |
| 24               | 6                | 0              | 2.101369                | -1.913216 | 0.282006  |
| 25               | 1                | 0              | 0.603718                | -3.455298 | 0.134259  |
| 26               | 1                | 0              | 0.002692                | -1.837181 | -0.210205 |
| 27               | 1                | 0              | 2.231893                | -0.856638 | 0.504986  |
| 28               | 1                | 0              | 2.806937                | -2.504869 | 0.864332  |
| 29               | 35               | 0              | 2.785141                | -2.118431 | -1.619570 |
| 30               | 6                | 0              | 0.767563                | 3.098669  | -0.313771 |
| 31               | 1                | 0              | -0.286331               | 3.175532  | -0.553775 |
| 32               | 6                | 0              | -3.025891               | 0.549974  | -1.527081 |
| 33               | 1                | 0              | -2.055630               | 0.858018  | -1.896948 |
| 34               | 7                | 0              | 2.494305                | 1.845613  | 0.800442  |
| 35               | 7                | 0              | -4.299108               | -0.278306 | 0.339135  |

**D 1**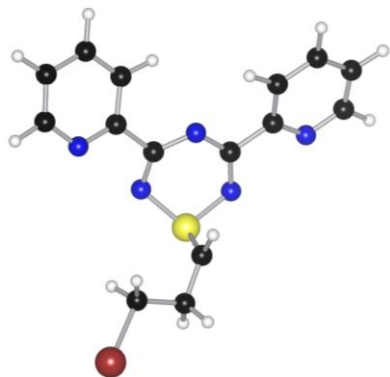

HF (B3LYP/6-31+G(d,p)) = -3823.115956 Hartrees

HF (M062X/6-31+G(d,p)//B3LYP/6-31+G(d,p)) = -3822.862049 Hartrees

Imaginary Frequencies: none found

Zero point correction = 0.257082 (Hartree/Particle)

Thermal correction = 0.203907 Hartrees

Coordinates from last standard orientation:

| Center<br>Number | Atomic<br>Number | Atomic<br>Type | Coordinates (Angstroms) |           |           |
|------------------|------------------|----------------|-------------------------|-----------|-----------|
|                  |                  |                | X                       | Y         | Z         |
| 1                | 7                | 0              | -0.145499               | 0.722812  | 1.439125  |
| 2                | 6                | 0              | 0.761022                | 1.144790  | 0.564956  |
| 3                | 6                | 0              | 2.040466                | -0.802366 | 0.399633  |
| 4                | 7                | 0              | 1.333332                | -1.584914 | 1.201320  |
| 5                | 16               | 0              | -0.161077               | -0.945777 | 1.638774  |
| 6                | 7                | 0              | 1.771002                | 0.460584  | -0.012310 |
| 7                | 6                | 0              | 0.689029                | 2.604467  | 0.219269  |
| 8                | 6                | 0              | 1.746815                | 4.650294  | -0.472115 |
| 9                | 6                | 0              | -0.598288               | 4.490253  | -0.000239 |
| 10               | 1                | 0              | 2.626863                | 5.214447  | -0.767108 |
| 11               | 1                | 0              | -1.590006               | 4.932935  | 0.067647  |
| 12               | 6                | 0              | 3.341983                | -1.372879 | -0.095654 |
| 13               | 6                | 0              | 5.368718                | -1.163420 | -1.375954 |
| 14               | 6                | 0              | 4.803800                | -3.140755 | -0.146483 |
| 15               | 1                | 0              | 6.030073                | -0.594850 | -2.023414 |
| 16               | 1                | 0              | 5.023642                | -4.154142 | 0.184010  |
| 17               | 6                | 0              | 0.498826                | 5.267111  | -0.386426 |
| 18               | 1                | 0              | 0.371030                | 6.320789  | -0.614362 |
| 19               | 6                | 0              | 5.699803                | -2.457202 | -0.976196 |
| 20               | 1                | 0              | 6.622498                | -2.931382 | -1.296149 |
| 21               | 6                | 0              | -1.218413               | -1.496826 | 0.214872  |
| 22               | 6                | 0              | -2.666888               | -1.031241 | 0.400311  |
| 23               | 1                | 0              | -1.124176               | -2.588335 | 0.218923  |
| 24               | 1                | 0              | -0.759702               | -1.101275 | -0.696335 |
| 25               | 6                | 0              | -3.518890               | -1.562157 | -0.740739 |
| 26               | 1                | 0              | -3.060745               | -1.397453 | 1.355236  |
| 27               | 1                | 0              | -2.707149               | 0.061591  | 0.426720  |
| 28               | 1                | 0              | -3.190378               | -1.179959 | -1.708038 |
| 29               | 1                | 0              | -3.530764               | -2.652486 | -0.770791 |
| 30               | 35               | 0              | -5.406821               | -1.029014 | -0.591196 |
| 31               | 6                | 0              | 4.170713                | -0.607376 | -0.929073 |
| 32               | 1                | 0              | 3.862550                | 0.391047  | -1.210884 |
| 33               | 6                | 0              | 1.846012                | 3.292881  | -0.171139 |
| 34               | 1                | 0              | 2.788411                | 2.762352  | -0.226678 |
| 35               | 7                | 0              | 3.651938                | -2.622796 | 0.284296  |
| 36               | 7                | 0              | -0.515691               | 3.191626  | 0.302223  |

## E-TS

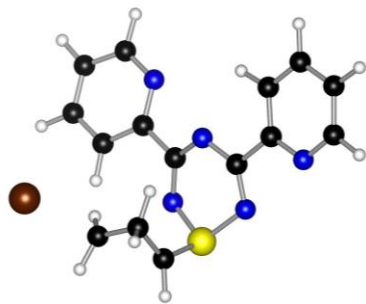

HF (B3LYP/6-31+G(d,p)) = -3823.105861 Hartrees

HF (M062X/6-31+G(d,p)//B3LYP/6-31+G(d,p)) = -3822.855421 Hartrees

Imaginary Frequencies: 1 (-409.33 cm<sup>-1</sup>)

Zero-point correction = 0.256476 (Hartree/Particle)

Thermal Correction = 0.204000 Hartrees

Coordinates from last standard orientation:

| Center<br>Number | Atomic<br>Number | Atomic<br>Type | Coordinates (Angstroms) |           |           |
|------------------|------------------|----------------|-------------------------|-----------|-----------|
|                  |                  |                | X                       | Y         | Z         |
| 1                | 7                | 0              | -1.948553               | -0.992927 | 1.607581  |
| 2                | 6                | 0              | -2.018833               | -0.190092 | 0.562734  |
| 3                | 6                | 0              | -0.062812               | 0.997873  | 0.896551  |
| 4                | 7                | 0              | 0.356753                | 0.388953  | 1.999586  |
| 5                | 16               | 0              | -0.401093               | -1.110908 | 2.345197  |
| 6                | 7                | 0              | -1.125774               | 0.728192  | 0.122212  |
| 7                | 6                | 0              | -3.301945               | -0.222333 | -0.230400 |
| 8                | 6                | 0              | -4.717544               | 0.737032  | -1.929602 |
| 9                | 6                | 0              | -5.326544               | -1.210520 | -0.679107 |
| 10               | 1                | 0              | -4.915917               | 1.489566  | -2.688754 |
| 11               | 1                | 0              | -6.020746               | -2.017507 | -0.445601 |
| 12               | 6                | 0              | 0.772346                | 2.188338  | 0.495655  |
| 13               | 6                | 0              | 2.878692                | 3.361404  | 0.517422  |
| 14               | 6                | 0              | 0.946357                | 4.181848  | -0.631207 |
| 15               | 1                | 0              | 3.922235                | 3.433417  | 0.811445  |
| 16               | 1                | 0              | 0.446862                | 4.930854  | -1.245133 |
| 17               | 6                | 0              | -5.645144               | -0.273069 | -1.665527 |
| 18               | 1                | 0              | -6.585512               | -0.339414 | -2.205811 |
| 19               | 6                | 0              | 2.287136                | 4.346624  | -0.275123 |
| 20               | 1                | 0              | 2.844956                | 5.214351  | -0.615741 |
| 21               | 6                | 0              | 0.494608                | -2.326044 | 1.535044  |
| 22               | 6                | 0              | 0.799836                | -2.387373 | 0.064677  |
| 23               | 1                | 0              | 0.647455                | -3.200385 | 2.158242  |
| 24               | 6                | 0              | 2.135081                | -1.924426 | 0.477149  |
| 25               | 1                | 0              | 0.768745                | -3.388613 | -0.369268 |
| 26               | 1                | 0              | 0.248266                | -1.683006 | -0.556969 |
| 27               | 1                | 0              | 2.292378                | -0.878201 | 0.679080  |
| 28               | 1                | 0              | 2.818684                | -2.626655 | 0.928198  |
| 29               | 35               | 0              | 3.720614                | -1.785413 | -1.475311 |
| 30               | 6                | 0              | 2.111061                | 2.270468  | 0.913745  |
| 31               | 1                | 0              | 2.520933                | 1.480603  | 1.530716  |
| 32               | 6                | 0              | -3.529434               | 0.766597  | -1.204544 |
| 33               | 1                | 0              | -2.767497               | 1.520829  | -1.361329 |
| 34               | 7                | 0              | 0.199451                | 3.134794  | -0.266900 |
| 35               | 7                | 0              | -4.190735               | -1.197558 | 0.024499  |

## E1-TS

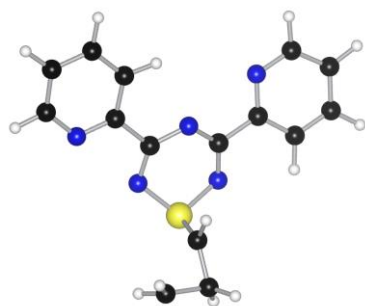

HF (B3LYP/6-31+G(d,p)) = -3823.1056158 Hartrees

HF (M062X/6-31+G(d,p)//B3LYP/6-31+G(d,p)) = -3822.8510794 Hartrees

Imaginary Frequencies: 1 (-409.87 cm<sup>-1</sup>)

Zero point correction = 0.256199 (Hartree/Particle)

Thermal correction = 0.202835 Hartrees

### Coordinates from last standard orientation:

| Center Number | Atomic Number | Atomic Type | Coordinates (Angstroms) |           |           |
|---------------|---------------|-------------|-------------------------|-----------|-----------|
|               |               |             | X                       | Y         | Z         |
| 1             | 7             | 0           | 0.094154                | 1.015866  | 1.043449  |
| 2             | 6             | 0           | -1.011441               | 1.212691  | 0.350972  |
| 3             | 6             | 0           | -1.822163               | -0.952028 | 0.327968  |
| 4             | 7             | 0           | -0.863472               | -1.516185 | 1.054466  |
| 5             | 16            | 0           | 0.598222                | -0.613898 | 1.131838  |
| 6             | 7             | 0           | -1.911214               | 0.311719  | -0.115956 |
| 7             | 6             | 0           | -1.396019               | 2.648749  | 0.096729  |
| 8             | 6             | 0           | -3.004988               | 4.265547  | -0.682064 |
| 9             | 6             | 0           | -0.865989               | 4.881889  | 0.197210  |
| 10            | 1             | 0           | -3.973414               | 4.514143  | -1.109222 |
| 11            | 1             | 0           | -0.124158               | 5.632535  | 0.468168  |
| 12            | 6             | 0           | -2.983814               | -1.860508 | 0.017183  |
| 13            | 6             | 0           | -3.902389               | -4.086386 | -0.143940 |
| 14            | 6             | 0           | -5.173262               | -2.119381 | -0.634046 |
| 15            | 1             | 0           | -3.800075               | -5.165343 | -0.059659 |
| 16            | 1             | 0           | -6.098856               | -1.631387 | -0.938484 |
| 17            | 6             | 0           | -2.093734               | 5.269391  | -0.347051 |
| 18            | 1             | 0           | -2.320445               | 6.320530  | -0.502638 |
| 19            | 6             | 0           | -5.112055               | -3.511997 | -0.541857 |
| 20            | 1             | 0           | -5.982282               | -4.119084 | -0.774988 |
| 21            | 6             | 0           | 1.471482                | -0.899073 | -0.305716 |
| 22            | 6             | 0           | 2.756065                | -1.685130 | -0.271892 |
| 23            | 1             | 0           | 1.000349                | -0.656879 | -1.252476 |
| 24            | 6             | 0           | 3.410415                | -0.370301 | -0.256556 |
| 25            | 1             | 0           | 2.937674                | -2.289222 | -1.162323 |
| 26            | 1             | 0           | 2.923244                | -2.279498 | 0.628024  |
| 27            | 1             | 0           | 3.489908                | 0.163337  | 0.677675  |
| 28            | 1             | 0           | 3.436067                | 0.218485  | -1.160190 |
| 29            | 35            | 0           | 5.907818                | -0.543953 | -0.338076 |
| 30            | 6             | 0           | -2.824779               | -3.252888 | 0.139179  |
| 31            | 1             | 0           | -1.863759               | -3.640861 | 0.454572  |
| 32            | 6             | 0           | -2.656165               | 2.936154  | -0.458148 |
| 33            | 1             | 0           | -3.317492               | 2.110674  | -0.692932 |
| 34            | 7             | 0           | -4.146799               | -1.305515 | -0.366497 |
| 35            | 7             | 0           | -0.515374               | 3.611677  | 0.415954  |



**E**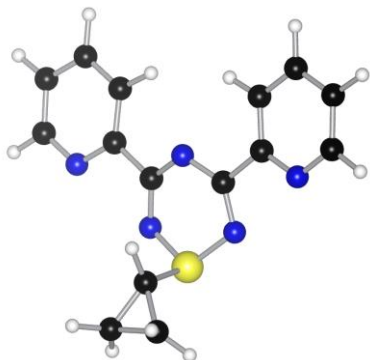

HF (B3LYP/6-31+G(d,p)) = -1251.3139237 Hartrees

HF (M062X/6-31+G(d,p)//B3LYP/6-31+G(d,p)) = -1250.942544 Hartrees

Imaginary Frequencies: none found

Zero point correction = 0.258159 (Hartree/Particle)

Thermal correction = 0.208643 Hartrees

Coordinates from last standard orientation:

| Center Number | Atomic Number | Atomic Type | Coordinates (Angstroms) |           |           |
|---------------|---------------|-------------|-------------------------|-----------|-----------|
|               |               |             | X                       | Y         | Z         |
| 1             | 7             | 0           | -1.372318               | 1.186439  | -0.843694 |
| 2             | 6             | 0           | -1.166952               | 0.001110  | -0.286409 |
| 3             | 6             | 0           | 1.166880                | 0.000960  | -0.286523 |
| 4             | 7             | 0           | 1.372362                | 1.186237  | -0.843886 |
| 5             | 16            | 0           | 0.000085                | 2.159484  | -0.895396 |
| 6             | 7             | 0           | -0.000050               | -0.574972 | 0.083046  |
| 7             | 6             | 0           | -2.395220               | -0.845709 | -0.087512 |
| 8             | 6             | 0           | -3.424695               | -2.967858 | 0.393261  |
| 9             | 6             | 0           | -4.686153               | -0.978565 | -0.042547 |
| 10            | 1             | 0           | -3.356751               | -4.026215 | 0.628276  |
| 11            | 1             | 0           | -5.633737               | -0.453755 | -0.148991 |
| 12            | 6             | 0           | 2.395074                | -0.845955 | -0.087662 |
| 13            | 6             | 0           | 3.424419                | -2.968588 | 0.391234  |
| 14            | 6             | 0           | 4.685987                | -0.978602 | -0.041095 |
| 15            | 1             | 0           | 3.356416                | -4.027256 | 0.624829  |
| 16            | 1             | 0           | 5.633592                | -0.453548 | -0.146131 |
| 17            | 6             | 0           | -4.664606               | -2.344731 | 0.258143  |
| 18            | 1             | 0           | -5.592515               | -2.894179 | 0.383751  |
| 19            | 6             | 0           | 4.664362                | -2.345146 | 0.257859  |
| 20            | 1             | 0           | 5.592237                | -2.894648 | 0.383487  |
| 21            | 6             | 0           | 0.000244                | 2.924118  | 0.747226  |
| 22            | 6             | 0           | 0.752975                | 4.222478  | 0.909164  |
| 23            | 6             | 0           | -0.752283               | 4.222585  | 0.909271  |
| 24            | 1             | 0           | 0.000255                | 2.197417  | 1.554696  |
| 25            | 1             | 0           | 1.261272                | 4.629763  | 0.039425  |
| 26            | 1             | 0           | 1.286405                | 4.361518  | 1.844185  |
| 27            | 1             | 0           | -1.285558               | 4.361703  | 1.844369  |
| 28            | 1             | 0           | -1.260646               | 4.629941  | 0.039604  |
| 29            | 6             | 0           | 2.268474                | -2.208794 | 0.218508  |
| 30            | 1             | 0           | 1.281267                | -2.641263 | 0.314863  |
| 31            | 6             | 0           | -2.268702               | -2.208158 | 0.220435  |
| 32            | 1             | 0           | -1.281518               | -2.640378 | 0.318111  |
| 33            | 7             | 0           | 3.587103                | -0.239949 | -0.210857 |
| 34            | 7             | 0           | -3.587225               | -0.239998 | -0.212360 |

## F-TS

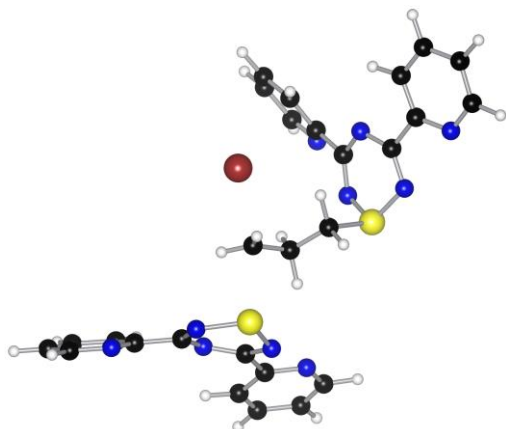

HF (B3LYP/6-31+G(d,p)) = -4957.7780916 Hartrees

HF (M062X/6-31+G(d,p)//B3LYP/6-31+G(d,p)) = -4957.202743 Hartrees

Imaginary Frequencies: 1 (-311.31 cm<sup>-1</sup>)

Zero point correction = 0.455755 (Hartree/Particle)

Thermal correction = 0.378200 Hartrees

Coordinates from last standard orientation:

| Center<br>Number | Atomic<br>Number | Atomic<br>Type | Coordinates (Angstroms) |           |           |
|------------------|------------------|----------------|-------------------------|-----------|-----------|
|                  |                  |                | X                       | Y         | Z         |
| 1                | 7                | 0              | 3.708982                | 1.855322  | -0.950028 |
| 2                | 6                | 0              | 4.395476                | 0.787118  | -0.568390 |
| 3                | 6                | 0              | 3.174708                | 0.221674  | 1.329485  |
| 4                | 7                | 0              | 2.281462                | 1.195770  | 1.299941  |
| 5                | 16               | 0              | 2.196716                | 1.968751  | -0.199889 |
| 6                | 7                | 0              | 4.131930                | -0.090092 | 0.424212  |
| 7                | 6                | 0              | 1.231890                | 0.749190  | -1.207318 |
| 8                | 6                | 0              | -0.136193               | 0.435004  | -0.601037 |
| 9                | 1                | 0              | 1.841949                | -0.156132 | -1.263170 |
| 10               | 1                | 0              | 1.158700                | 1.215600  | -2.195729 |
| 11               | 6                | 0              | -0.754155               | -0.760390 | -1.269759 |
| 12               | 1                | 0              | -0.031855               | 0.213105  | 0.464763  |
| 13               | 1                | 0              | -0.801642               | 1.307685  | -0.682769 |
| 14               | 1                | 0              | -1.581802               | -1.276361 | -0.810659 |
| 15               | 1                | 0              | -0.416470               | -1.113923 | -2.230523 |
| 16               | 35               | 0              | 0.766976                | -2.517963 | -0.266010 |
| 17               | 7                | 0              | -2.847955               | 1.816076  | -1.605750 |
| 18               | 6                | 0              | -3.557286               | 1.567427  | -0.525036 |
| 19               | 6                | 0              | -4.473474               | -0.493346 | -1.143060 |
| 20               | 7                | 0              | -3.892966               | -0.653266 | -2.303822 |
| 21               | 16               | 0              | -2.609031               | 0.444687  | -2.609684 |
| 22               | 7                | 0              | -4.260414               | 0.458568  | -0.181898 |
| 23               | 6                | 0              | 3.152490                | -0.653183 | 2.549403  |
| 24               | 6                | 0              | 3.331199                | -2.841807 | 3.520796  |
| 25               | 6                | 0              | 2.818484                | -0.883097 | 4.803335  |
| 26               | 6                | 0              | 3.037775                | -2.262000 | 4.756450  |
| 27               | 1                | 0              | 3.489022                | -3.912880 | 3.431172  |
| 28               | 1                | 0              | 2.590941                | -0.393133 | 5.748849  |
| 29               | 1                | 0              | 2.970923                | -2.858781 | 5.661646  |
| 30               | 6                | 0              | 5.676519                | 0.521967  | -1.316531 |
| 31               | 6                | 0              | 7.545103                | -0.917192 | -1.799637 |
| 32               | 6                | 0              | 7.234362                | 1.209014  | -2.855381 |
| 33               | 6                | 0              | 7.994741                | 0.045535  | -2.704121 |
| 34               | 1                | 0              | 8.098243                | -1.840309 | -1.648701 |
| 35               | 1                | 0              | 7.551236                | 1.986087  | -3.549625 |

|    |   |   |           |           |           |
|----|---|---|-----------|-----------|-----------|
| 36 | 1 | 0 | 8.905084  | -0.095436 | -3.279563 |
| 37 | 6 | 0 | -3.655342 | 2.701526  | 0.462122  |
| 38 | 6 | 0 | -4.800337 | 3.804537  | 2.273661  |
| 39 | 6 | 0 | -2.765876 | 4.636206  | 1.325056  |
| 40 | 6 | 0 | -3.798398 | 4.776144  | 2.257084  |
| 41 | 1 | 0 | -5.623190 | 3.866684  | 2.981377  |
| 42 | 1 | 0 | -1.957292 | 5.364975  | 1.288030  |
| 43 | 1 | 0 | -3.806438 | 5.614554  | 2.947690  |
| 44 | 6 | 0 | -5.551610 | -1.486744 | -0.793685 |
| 45 | 6 | 0 | -6.918236 | -2.572185 | 0.870548  |
| 46 | 6 | 0 | -7.038958 | -3.106043 | -1.458569 |
| 47 | 6 | 0 | -7.488290 | -3.329787 | -0.153879 |
| 48 | 1 | 0 | -7.227728 | -2.711005 | 1.903348  |
| 49 | 1 | 0 | -7.460367 | -3.672928 | -2.288144 |
| 50 | 1 | 0 | -8.255644 | -4.072491 | 0.045368  |
| 51 | 7 | 0 | 2.862239  | -0.086903 | 3.729353  |
| 52 | 7 | 0 | 6.101891  | 1.448949  | -2.189492 |
| 53 | 6 | 0 | 3.401002  | -2.025018 | 2.395945  |
| 54 | 1 | 0 | 3.601299  | -2.423562 | 1.409495  |
| 55 | 6 | 0 | 6.371690  | -0.676519 | -1.088781 |
| 56 | 1 | 0 | 5.976865  | -1.381956 | -0.368938 |
| 57 | 6 | 0 | -5.942104 | -1.632381 | 0.548752  |
| 58 | 1 | 0 | -5.467857 | -1.011593 | 1.298556  |
| 59 | 6 | 0 | -4.727873 | 2.749033  | 1.367502  |
| 60 | 1 | 0 | -5.468032 | 1.959021  | 1.338170  |
| 61 | 7 | 0 | -6.094741 | -2.217958 | -1.781216 |
| 62 | 7 | 0 | -2.687131 | 3.633303  | 0.446288  |

**F**

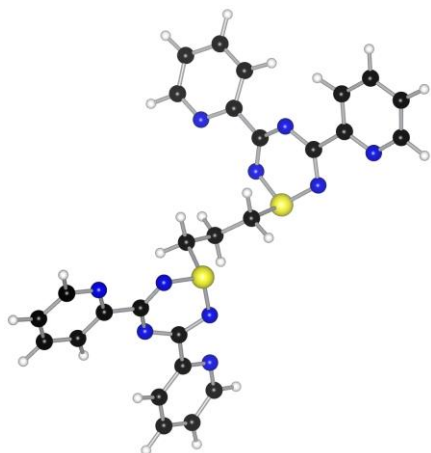

HF (B3LYP/6-31+G(d,p)) = -2385.9639024 Hartrees

HF (M062X/6-31+G(d,p)//B3LYP/6-31+G(d,p)) = -2385.270823 Hartrees

Imaginary Frequencies: none found

Zero point correction = 0.457825 (Hartree/Particle)

Thermal correction = 0.383757 Hartrees

Coordinates from last standard orientation:

| Center Number | Atomic Number | Atomic Type | Coordinates (Angstroms) |           |           |
|---------------|---------------|-------------|-------------------------|-----------|-----------|
|               |               |             | X                       | Y         | Z         |
| 1             | 7             | 0           | 3.544646                | -1.905008 | 0.258085  |
| 2             | 6             | 0           | 4.398753                | -0.928311 | 0.521649  |
| 3             | 6             | 0           | 3.861986                | 0.513918  | -1.234818 |
| 4             | 7             | 0           | 2.947950                | -0.232745 | -1.843520 |

|    |    |   |           |           |           |
|----|----|---|-----------|-----------|-----------|
| 5  | 16 | 0 | 2.392264  | -1.515158 | -0.906244 |
| 6  | 7  | 0 | 4.530028  | 0.276595  | -0.086839 |
| 7  | 6  | 0 | 1.092197  | -0.689337 | 0.133460  |
| 8  | 6  | 0 | -0.053938 | -0.185492 | -0.748128 |
| 9  | 1  | 0 | 1.590366  | 0.118309  | 0.679123  |
| 10 | 1  | 0 | 0.782476  | -1.464254 | 0.841781  |
| 11 | 6  | 0 | -1.069391 | 0.675715  | 0.007673  |
| 12 | 1  | 0 | 0.356521  | 0.433942  | -1.554029 |
| 13 | 1  | 0 | -0.571319 | -1.030360 | -1.215394 |
| 14 | 1  | 0 | -1.837483 | 1.065777  | -0.665835 |
| 15 | 1  | 0 | -0.602399 | 1.512874  | 0.537188  |
| 16 | 7  | 0 | -2.692946 | -1.505074 | 0.453412  |
| 17 | 6  | 0 | -3.844421 | -1.151151 | -0.105734 |
| 18 | 6  | 0 | -4.230308 | 0.825683  | 1.078853  |
| 19 | 7  | 0 | -3.125727 | 0.852647  | 1.809248  |
| 20 | 16 | 0 | -1.965960 | -0.273132 | 1.336274  |
| 21 | 7  | 0 | -4.582265 | -0.039074 | 0.095654  |
| 22 | 6  | 0 | 4.253911  | 1.769458  | -1.961342 |
| 23 | 6  | 0 | 5.865462  | 3.481450  | -2.468211 |
| 24 | 6  | 0 | 3.675380  | 3.424828  | -3.440735 |
| 25 | 6  | 0 | 4.922442  | 4.047390  | -3.325903 |
| 26 | 1  | 0 | 6.847197  | 3.930211  | -2.347313 |
| 27 | 1  | 0 | 2.909757  | 3.842590  | -4.091580 |
| 28 | 1  | 0 | 5.139443  | 4.948319  | -3.891415 |
| 29 | 6  | 0 | 5.386980  | -1.198608 | 1.624291  |
| 30 | 6  | 0 | 7.208160  | -0.485866 | 3.026490  |
| 31 | 6  | 0 | 6.194738  | -2.649233 | 3.207947  |
| 32 | 6  | 0 | 7.155559  | -1.732137 | 3.648832  |
| 33 | 1  | 0 | 7.933488  | 0.260813  | 3.336796  |
| 34 | 1  | 0 | 6.119169  | -3.631827 | 3.669820  |
| 35 | 1  | 0 | 7.833872  | -1.992806 | 4.455405  |
| 36 | 6  | 0 | -4.438857 | -2.162342 | -1.044201 |
| 37 | 6  | 0 | -6.342654 | -3.152111 | -2.130295 |
| 38 | 6  | 0 | -4.099823 | -3.927176 | -2.470315 |
| 39 | 6  | 0 | -5.465874 | -4.043750 | -2.747649 |
| 40 | 1  | 0 | -7.411598 | -3.205308 | -2.315507 |
| 41 | 1  | 0 | -3.383329 | -4.597401 | -2.941049 |
| 42 | 1  | 0 | -5.823282 | -4.809525 | -3.429110 |
| 43 | 6  | 0 | -5.258675 | 1.875217  | 1.405507  |
| 44 | 6  | 0 | -7.393582 | 2.911925  | 1.007249  |
| 45 | 6  | 0 | -5.867306 | 3.678632  | 2.687215  |
| 46 | 6  | 0 | -7.097017 | 3.809114  | 2.032102  |
| 47 | 1  | 0 | -8.333142 | 2.976432  | 0.465979  |
| 48 | 1  | 0 | -5.596387 | 4.361823  | 3.489971  |
| 49 | 1  | 0 | -7.791742 | 4.592348  | 2.319372  |
| 50 | 7  | 0 | 3.339952  | 2.311546  | -2.782665 |
| 51 | 7  | 0 | 5.326896  | -2.397109 | 2.226266  |
| 52 | 7  | 0 | -3.588855 | -3.015551 | -1.638447 |
| 53 | 7  | 0 | -4.964521 | 2.743043  | 2.386842  |
| 54 | 6  | 0 | -6.461900 | 1.925383  | 0.686367  |
| 55 | 1  | 0 | -6.639112 | 1.205292  | -0.101856 |
| 56 | 6  | 0 | -5.822525 | -2.188744 | -1.267316 |
| 57 | 1  | 0 | -6.456252 | -1.469304 | -0.764125 |
| 58 | 6  | 0 | 6.311738  | -0.211090 | 1.994404  |
| 59 | 1  | 0 | 6.306968  | 0.740072  | 1.478075  |
| 60 | 6  | 0 | 5.526094  | 2.325539  | -1.767090 |
| 61 | 1  | 0 | 6.217018  | 1.846309  | -1.084855 |

---

**G**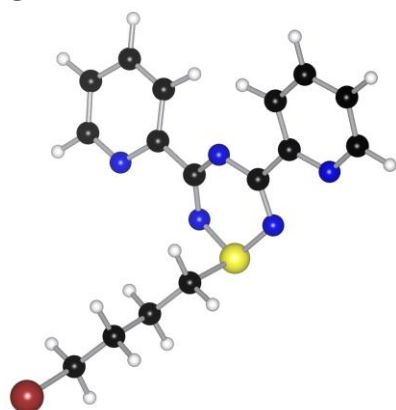

HF (B3LYP/6-31+G(d,p)) = -3863.002696 Hartrees

HF (M062X/6-31+G(d,p)//B3LYP/6-31+G(d,p)) = -3862.672959 Hartrees

Imaginary Frequencies: none found

Zero point correction = 0.300591 (Hartree/Particle)

Thermal correction = 0.244850 Hartrees

Coordinates from last standard orientation:

| Center Number | Atomic Number | Atomic Type | Coordinates (Angstroms) |           |           |
|---------------|---------------|-------------|-------------------------|-----------|-----------|
|               |               |             | X                       | Y         | Z         |
| 1             | 7             | 0           | -1.678526               | -1.546330 | 1.368893  |
| 2             | 6             | 0           | -2.354050               | -0.908626 | 0.425122  |
| 3             | 6             | 0           | -1.337003               | 1.187250  | 0.596453  |
| 4             | 7             | 0           | -0.512834               | 0.935555  | 1.606579  |
| 5             | 16            | 0           | -0.332747               | -0.705218 | 1.932416  |
| 6             | 7             | 0           | -2.173936               | 0.348543  | -0.050034 |
| 7             | 6             | 0           | -3.505673               | -1.662790 | -0.183487 |
| 8             | 6             | 0           | -4.772374               | -3.574977 | -0.242976 |
| 9             | 6             | 0           | -5.312739               | -1.806344 | -1.766158 |
| 10            | 1             | 0           | -4.948839               | -4.566983 | 0.168536  |
| 11            | 1             | 0           | -5.910809               | -1.382290 | -2.567642 |
| 12            | 6             | 0           | -1.392576               | 2.621968  | 0.153954  |
| 13            | 6             | 0           | -2.578082               | 4.465418  | -0.836617 |
| 14            | 6             | 0           | -0.334611               | 4.650725  | -0.013426 |
| 15            | 1             | 0           | -3.465217               | 4.887890  | -1.299535 |
| 16            | 1             | 0           | 0.570473                | 5.227440  | 0.166906  |
| 17            | 6             | 0           | -5.583006               | -3.081326 | -1.271369 |
| 18            | 1             | 0           | -6.394659               | -3.683595 | -1.667736 |
| 19            | 6             | 0           | -1.446725               | 5.249912  | -0.613581 |
| 20            | 1             | 0           | -1.418692               | 6.297411  | -0.897290 |
| 21            | 6             | 0           | 0.955532                | -1.206994 | 0.695570  |
| 22            | 6             | 0           | 2.293936                | -0.532491 | 0.992251  |
| 23            | 1             | 0           | 0.567810                | -0.952163 | -0.295235 |
| 24            | 1             | 0           | 1.006930                | -2.297366 | 0.788449  |
| 25            | 6             | 0           | 3.385289                | -1.000932 | 0.011664  |
| 26            | 1             | 0           | 2.172297                | 0.554662  | 0.930740  |
| 27            | 1             | 0           | 2.602292                | -0.763488 | 2.020599  |
| 28            | 1             | 0           | 3.517247                | -2.086814 | 0.082172  |
| 29            | 1             | 0           | 3.083543                | -0.780482 | -1.018673 |
| 30            | 6             | 0           | 4.699097                | -0.304786 | 0.317619  |
| 31            | 1             | 0           | 5.061646                | -0.534419 | 1.320295  |
| 32            | 1             | 0           | 4.626181                | 0.777018  | 0.200969  |
| 33            | 35            | 0           | 6.147252                | -0.861400 | -0.896043 |
| 34            | 6             | 0           | -2.551539               | 3.125612  | -0.453062 |
| 35            | 1             | 0           | -3.399478               | 2.469805  | -0.606110 |

|    |   |   |           |           |           |
|----|---|---|-----------|-----------|-----------|
| 36 | 6 | 0 | -4.258576 | -1.080048 | -1.213471 |
| 37 | 1 | 0 | -4.003177 | -0.087187 | -1.560384 |
| 38 | 7 | 0 | -0.298576 | 3.370983  | 0.368478  |
| 39 | 7 | 0 | -3.755958 | -2.893944 | 0.289780  |

## H

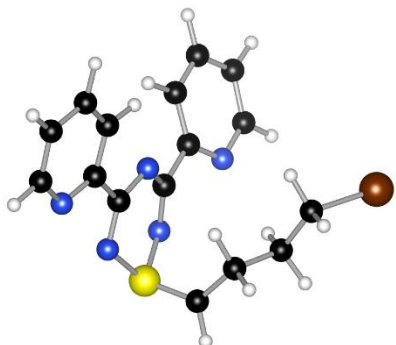

HF (B3LYP/6-31+G(d,p)) = -3862.4278005 Hartrees

HF (M062X/6-31+G(d,p)//B3LYP/6-31+G(d,p)) = -3862.1579702Hartrees

Imaginary Frequencies: none found

Zero point correction = 0.285468 (Hartree/Particle)

Thermal correction = 0.229649 Hartrees

### Coordinates from last standard orientation:

| Center Number | Atomic Number | Atomic Type | Coordinates (Angstroms) |           |           |
|---------------|---------------|-------------|-------------------------|-----------|-----------|
|               |               |             | X                       | Y         | Z         |
| 1             | 7             | 0           | 0.158002                | 0.761522  | 2.276080  |
| 2             | 6             | 0           | 0.307889                | 1.143440  | 1.024193  |
| 3             | 6             | 0           | 2.263173                | -0.015311 | 0.553865  |
| 4             | 7             | 0           | 2.416340                | -0.615140 | 1.716415  |
| 5             | 16            | 0           | 1.002078                | -0.703924 | 2.719723  |
| 6             | 7             | 0           | 1.248082                | 0.775508  | 0.117573  |
| 7             | 6             | 0           | -0.647645               | 2.195689  | 0.524315  |
| 8             | 6             | 0           | -2.714005               | 3.202948  | 0.635940  |
| 9             | 6             | 0           | -1.127497               | 4.061587  | -0.934224 |
| 10            | 1             | 0           | -3.699656               | 3.211777  | 1.101069  |
| 11            | 1             | 0           | -0.831236               | 4.759880  | -1.713750 |
| 12            | 6             | 0           | 3.387129                | -0.175748 | -0.443047 |
| 13            | 6             | 0           | 5.482550                | -0.979493 | -0.956052 |
| 14            | 6             | 0           | 4.290884                | 0.209157  | -2.652492 |
| 15            | 1             | 0           | 6.360801                | -1.523182 | -0.606678 |
| 16            | 1             | 0           | 4.201986                | 0.615494  | -3.657531 |
| 17            | 6             | 0           | -2.399402               | 4.131726  | -0.358670 |
| 18            | 1             | 0           | -3.127856               | 4.874829  | -0.671406 |
| 19            | 6             | 0           | 5.441562                | -0.479990 | -2.260239 |
| 20            | 1             | 0           | 6.278291                | -0.629473 | -2.937317 |
| 21            | 6             | 0           | 0.130957                | -2.037181 | 2.243153  |
| 22            | 6             | 0           | -0.379792               | -2.308508 | 0.858048  |
| 23            | 1             | 0           | -0.166589               | -2.664723 | 3.078086  |
| 24            | 6             | 0           | -1.850074               | -1.852730 | 0.612108  |
| 25            | 1             | 0           | 0.270693                | -1.819617 | 0.122138  |
| 26            | 1             | 0           | -0.317411               | -3.387689 | 0.643583  |
| 27            | 1             | 0           | -2.526730               | -2.474671 | 1.209749  |
| 28            | 1             | 0           | -1.973910               | -0.819594 | 0.947663  |
| 29            | 6             | 0           | -2.179022               | -1.977469 | -0.859637 |
| 30            | 1             | 0           | -2.015458               | -2.987499 | -1.239715 |

|    |    |   |           |           |           |
|----|----|---|-----------|-----------|-----------|
| 31 | 1  | 0 | -1.623998 | -1.264159 | -1.469318 |
| 32 | 35 | 0 | -4.090385 | -1.607859 | -1.308425 |
| 33 | 6  | 0 | 3.255806  | 0.367844  | -1.736281 |
| 34 | 1  | 0 | 2.341513  | 0.893251  | -1.981829 |
| 35 | 6  | 0 | -0.244375 | 3.081024  | -0.493881 |
| 36 | 1  | 0 | 0.749896  | 2.972240  | -0.909965 |
| 37 | 7  | 0 | 4.493242  | -0.843826 | -0.068490 |
| 38 | 7  | 0 | -1.872657 | 2.261800  | 1.075839  |

### H1 (productive conformer – leading to I-TS)

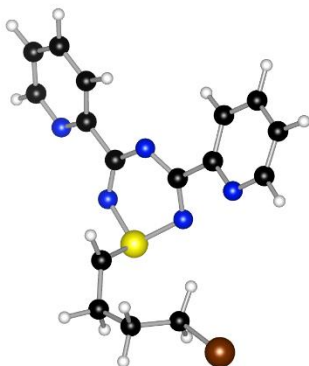

HF (B3LYP/6-31+G(d,p)) = -3862.4290752 Hartrees

HF (M062X/6-31+G(d,p)//B3LYP/6-31+G(d,p)) = -3862.1559194 Hartrees

Imaginary Frequencies: 1 (-470.37 cm<sup>-1</sup>)

Zero point correction = 0.285442 (Hartree/Particle)

Thermal correction = 0.230384 Hartrees

### Coordinates from last standard orientation:

| Center Number | Atomic Number | Atomic Type | Coordinates (Angstroms) |           |           |
|---------------|---------------|-------------|-------------------------|-----------|-----------|
|               |               |             | X                       | Y         | Z         |
| 1             | 6             | 0           | 0.385318                | -2.172954 | 0.632963  |
| 2             | 6             | 0           | 1.637781                | -2.999046 | 0.745367  |
| 3             | 6             | 0           | 2.961069                | -2.226395 | 1.013890  |
| 4             | 1             | 0           | 1.529038                | -3.731088 | 1.562281  |
| 5             | 1             | 0           | 1.769232                | -3.595247 | -0.170660 |
| 6             | 1             | 0           | 2.875052                | -1.655671 | 1.946649  |
| 7             | 1             | 0           | 3.776454                | -2.950710 | 1.149305  |
| 8             | 6             | 0           | 3.301642                | -1.282628 | -0.127336 |
| 9             | 35            | 0           | 5.142063                | -0.535792 | 0.068951  |
| 10            | 1             | 0           | -0.000496               | -1.660861 | 1.512639  |
| 11            | 7             | 0           | 0.225162                | 0.032472  | -1.092896 |
| 12            | 6             | 0           | -0.584197               | 0.848786  | -0.449323 |
| 13            | 6             | 0           | -2.405417               | -0.579451 | -0.295686 |
| 14            | 7             | 0           | -1.857287               | -1.667352 | -0.801957 |
| 15            | 16            | 0           | -0.137575               | -1.669296 | -0.864056 |
| 16            | 7             | 0           | -1.843109               | 0.619967  | -0.000290 |
| 17            | 1             | 0           | 3.327591                | -1.792530 | -1.091193 |
| 18            | 1             | 0           | 2.646948                | -0.414649 | -0.194235 |
| 19            | 6             | 0           | -3.886656               | -0.646943 | -0.016038 |
| 20            | 6             | 0           | -5.860381               | 0.295155  | 1.012970  |
| 21            | 6             | 0           | -5.900457               | -1.737929 | -0.243046 |
| 22            | 6             | 0           | -6.591610               | -0.782825 | 0.506519  |
| 23            | 1             | 0           | -6.346117               | 1.065626  | 1.607526  |
| 24            | 1             | 0           | -6.431305               | -2.594229 | -0.659917 |
| 25            | 1             | 0           | -7.658670               | -0.884976 | 0.684950  |

|    |   |   |           |           |           |
|----|---|---|-----------|-----------|-----------|
| 26 | 6 | 0 | -0.081965 | 2.246364  | -0.221346 |
| 27 | 6 | 0 | -0.492026 | 4.615536  | 0.003227  |
| 28 | 6 | 0 | 1.696808  | 3.658559  | 0.153592  |
| 29 | 6 | 0 | 0.883648  | 4.794197  | 0.179511  |
| 30 | 1 | 0 | -1.168742 | 5.466969  | 0.017697  |
| 31 | 1 | 0 | 2.772678  | 3.749996  | 0.301066  |
| 32 | 1 | 0 | 1.315039  | 5.778781  | 0.338499  |
| 33 | 7 | 0 | -4.589775 | -1.687461 | -0.498173 |
| 34 | 7 | 0 | 1.241532  | 2.417347  | -0.046047 |
| 35 | 6 | 0 | -4.497016 | 0.369055  | 0.745396  |
| 36 | 1 | 0 | -3.879650 | 1.182613  | 1.105433  |
| 37 | 6 | 0 | -0.982296 | 3.328169  | -0.191014 |
| 38 | 1 | 0 | -2.039201 | 3.126729  | -0.320766 |

## H2 (conformation of H leading from direct deprotonation of G)

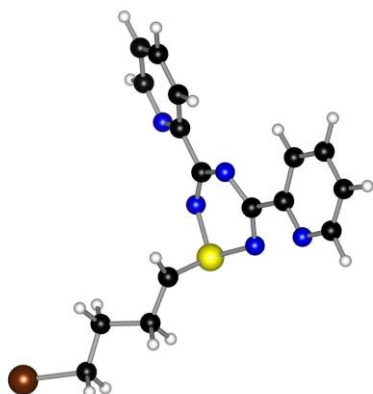

HF (B3LYP/6-31+G(d,p)) = -3863.002696 Hartrees

HF (M062X/6-31+G(d,p)//B3LYP/6-31+G(d,p)) = -3862.151835 Hartrees

Imaginary Frequencies: none found

Zero point correction = 0.28536 (Hartree/Particle)

Thermal correction = 0.244857 Hartrees

### Coordinates from last standard orientation:

| Center Number | Atomic Number | Atomic Type | Coordinates (Angstroms) |           |           |
|---------------|---------------|-------------|-------------------------|-----------|-----------|
|               |               |             | X                       | Y         | Z         |
| 1             | 7             | 0           | -1.349401               | -1.538934 | 1.197086  |
| 2             | 6             | 0           | -2.248893               | -1.012369 | 0.390476  |
| 3             | 6             | 0           | -1.524988               | 1.189261  | 0.487737  |
| 4             | 7             | 0           | -0.495759               | 1.016653  | 1.293148  |
| 5             | 16            | 0           | 0.107379                | -0.603744 | 1.383624  |
| 6             | 7             | 0           | -2.353019               | 0.263592  | -0.059318 |
| 7             | 6             | 0           | -3.376690               | -1.913583 | -0.040597 |
| 8             | 6             | 0           | -4.206824               | -4.037880 | -0.352965 |
| 9             | 6             | 0           | -5.637621               | -2.188953 | -0.852390 |
| 10            | 1             | 0           | -4.013691               | -5.109590 | -0.297328 |
| 11            | 1             | 0           | -6.585069               | -1.771504 | -1.185962 |
| 12            | 6             | 0           | -1.881977               | 2.613575  | 0.141129  |
| 13            | 6             | 0           | -1.608476               | 4.870651  | 0.501334  |
| 14            | 6             | 0           | -3.136119               | 4.183563  | -1.203339 |
| 15            | 1             | 0           | -1.106399               | 5.647083  | 1.079226  |
| 16            | 1             | 0           | -3.850455               | 4.397851  | -1.995170 |
| 17            | 6             | 0           | -5.449007               | -3.572766 | -0.791558 |
| 18            | 1             | 0           | -6.232883               | -4.270081 | -1.074769 |
| 19            | 6             | 0           | -2.520765               | 5.220853  | -0.497120 |
| 20            | 1             | 0           | -2.735308               | 6.264649  | -0.710048 |



|    |    |   |           |           |           |
|----|----|---|-----------|-----------|-----------|
| 21 | 6  | 0 | 1.098010  | -0.859159 | 0.075717  |
| 22 | 6  | 0 | 2.467341  | -1.442569 | 0.267096  |
| 23 | 1  | 0 | 0.711059  | -0.691529 | -0.926630 |
| 24 | 6  | 0 | 3.630193  | -0.512500 | -0.181470 |
| 25 | 1  | 0 | 2.609645  | -1.690742 | 1.328949  |
| 26 | 1  | 0 | 2.573272  | -2.396004 | -0.281725 |
| 27 | 1  | 0 | 3.505648  | -0.250024 | -1.238309 |
| 28 | 1  | 0 | 3.591317  | 0.419027  | 0.391738  |
| 29 | 6  | 0 | 4.948096  | -1.225902 | 0.032698  |
| 30 | 1  | 0 | 5.016290  | -2.150198 | -0.542398 |
| 31 | 1  | 0 | 5.131325  | -1.444383 | 1.085511  |
| 32 | 35 | 0 | 6.557832  | -0.193674 | -0.526564 |
| 33 | 6  | 0 | -2.820051 | 2.868060  | -0.878895 |
| 34 | 1  | 0 | -3.268167 | 2.023503  | -1.387270 |
| 35 | 6  | 0 | -4.592804 | -1.351119 | -0.476679 |
| 36 | 1  | 0 | -4.679328 | -0.271946 | -0.505475 |
| 37 | 7  | 0 | -1.285204 | 3.612887  | 0.815786  |
| 38 | 7  | 0 | -3.194616 | -3.245996 | 0.013921  |

### I-TS

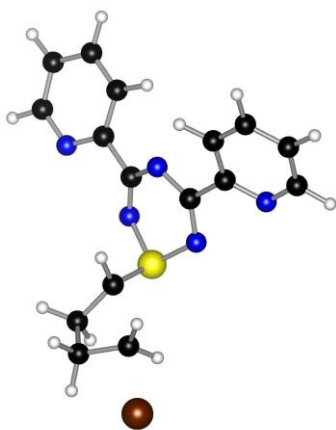

HF (B3LYP/6-31+G(d,p)) = -3862.409378 Hartrees

HF (M062X/6-31+G(d,p)//B3LYP/6-31+G(d,p)) = -3862.131257 Hartrees

Imaginary Frequencies: 1 (-470.37 cm<sup>-1</sup>)

Zero point correction = 0.284916 (Hartree/Particle)

Thermal correction = 0.230405 Hartrees

### Coordinates from last standard orientation:

| Center Number | Atomic Number | Atomic Type | Coordinates (Angstroms) |           |           |
|---------------|---------------|-------------|-------------------------|-----------|-----------|
|               |               |             | X                       | Y         | Z         |
| 1             | 6             | 0           | -1.137224               | -1.387475 | 0.031476  |
| 2             | 6             | 0           | -1.851553               | -2.732695 | 0.044959  |
| 3             | 6             | 0           | -3.201774               | -2.325213 | -0.560507 |
| 4             | 1             | 0           | -1.337567               | -3.550865 | -0.481443 |
| 5             | 1             | 0           | -1.996892               | -3.061866 | 1.082728  |
| 6             | 1             | 0           | -3.193158               | -2.380118 | -1.654580 |
| 7             | 1             | 0           | -4.062001               | -2.903470 | -0.211897 |
| 8             | 6             | 0           | -3.279602               | -0.866845 | -0.128655 |
| 9             | 35            | 0           | -5.647625               | -0.458849 | -0.468654 |
| 10            | 1             | 0           | -0.705794               | -1.069965 | -0.919334 |
| 11            | 7             | 0           | -0.083644               | 0.746662  | 1.258196  |
| 12            | 6             | 0           | 0.901035                | 1.168050  | 0.492122  |
| 13            | 6             | 0           | 2.166981                | -0.775395 | 0.392328  |

|    |    |   |           |           |           |
|----|----|---|-----------|-----------|-----------|
| 14 | 7  | 0 | 1.438366  | -1.510319 | 1.210344  |
| 15 | 16 | 0 | -0.188914 | -0.955552 | 1.399491  |
| 16 | 7  | 0 | 1.933121  | 0.480322  | -0.059915 |
| 17 | 1  | 0 | -3.381794 | -0.622945 | 0.916877  |
| 18 | 1  | 0 | -3.070720 | -0.049660 | -0.796426 |
| 19 | 6  | 0 | 3.490229  | -1.355671 | -0.031732 |
| 20 | 6  | 0 | 5.756091  | -1.046085 | -0.803555 |
| 21 | 6  | 0 | 4.816696  | -3.202974 | -0.368042 |
| 22 | 6  | 0 | 5.911094  | -2.433985 | -0.772592 |
| 23 | 1  | 0 | 6.576533  | -0.401867 | -1.110238 |
| 24 | 1  | 0 | 4.892293  | -4.289656 | -0.337898 |
| 25 | 1  | 0 | 6.846292  | -2.909976 | -1.053922 |
| 26 | 6  | 0 | 0.921130  | 2.647354  | 0.196520  |
| 27 | 6  | 0 | 1.625238  | 4.481028  | -1.203186 |
| 28 | 6  | 0 | 0.250815  | 4.778674  | 0.732007  |
| 29 | 6  | 0 | 0.918837  | 5.340502  | -0.359115 |
| 30 | 1  | 0 | 2.159046  | 4.866248  | -2.068486 |
| 31 | 1  | 0 | -0.307995 | 5.413198  | 1.419069  |
| 32 | 1  | 0 | 0.882103  | 6.411574  | -0.536807 |
| 33 | 7  | 0 | 3.636698  | -2.691825 | -0.004535 |
| 34 | 7  | 0 | 0.238863  | 3.471264  | 1.008087  |
| 35 | 6  | 0 | 4.531040  | -0.498738 | -0.433306 |
| 36 | 1  | 0 | 4.349401  | 0.568957  | -0.442346 |
| 37 | 6  | 0 | 1.634808  | 3.117969  | -0.919871 |
| 38 | 1  | 0 | 2.172887  | 2.405231  | -1.532609 |

I

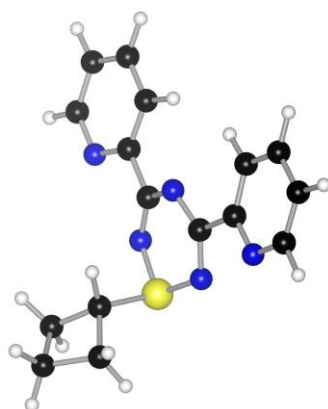

HF (B3LYP/6-31+G(d,p)) = -1290.6366098 Hartrees

HF (M062X/6-31+G(d,p)//B3LYP/6-31+G(d,p)) = -1290.239968 Hartrees

Imaginary Frequencies: none found

Zero point correction = 0.287415 (Hartree/Particle)

Thermal correction = 0.236029 Hartrees

Coordinates from last standard orientation:

| Center Number | Atomic Number | Atomic Type | Coordinates (Angstroms) |           |           |
|---------------|---------------|-------------|-------------------------|-----------|-----------|
|               |               |             | X                       | Y         | Z         |
| 1             | 7             | 0           | 1.376288                | 0.884389  | 1.020540  |
| 2             | 6             | 0           | 1.167973                | -0.249217 | 0.366490  |
| 3             | 6             | 0           | -1.167848               | -0.249358 | 0.366310  |
| 4             | 7             | 0           | -1.376393               | 0.884051  | 1.020647  |
| 5             | 16            | 0           | -0.000162               | 1.846556  | 1.165599  |
| 6             | 7             | 0           | 0.000114                | -0.794531 | -0.046367 |
| 7             | 6             | 0           | 2.395809                | -1.075372 | 0.092761  |
| 8             | 6             | 0           | 3.426006                | -3.164570 | -0.513731 |

|    |   |   |           |           |           |
|----|---|---|-----------|-----------|-----------|
| 9  | 6 | 0 | 4.685498  | -1.187388 | -0.020275 |
| 10 | 1 | 0 | 3.359078  | -4.211559 | -0.795313 |
| 11 | 1 | 0 | 5.632077  | -0.660277 | 0.083689  |
| 12 | 6 | 0 | -2.395477 | -1.075885 | 0.092879  |
| 13 | 6 | 0 | -3.425281 | -3.166143 | -0.510596 |
| 14 | 6 | 0 | -4.685052 | -1.187824 | -0.022417 |
| 15 | 1 | 0 | -3.358186 | -4.213702 | -0.790008 |
| 16 | 1 | 0 | -5.631674 | -0.660385 | 0.079459  |
| 17 | 6 | 0 | 4.664885  | -2.538468 | -0.382472 |
| 18 | 1 | 0 | 5.592736  | -3.074333 | -0.557485 |
| 19 | 6 | 0 | -4.664218 | -2.539620 | -0.381911 |
| 20 | 1 | 0 | -5.591951 | -3.075715 | -0.556859 |
| 21 | 6 | 0 | -0.000377 | 2.761849  | -0.437564 |
| 22 | 6 | 0 | -1.091939 | 3.847866  | -0.606378 |
| 23 | 6 | 0 | 1.090709  | 3.848337  | -0.606452 |
| 24 | 1 | 0 | -0.000250 | 2.013644  | -1.234678 |
| 25 | 6 | 0 | -0.000833 | 4.759360  | -1.238211 |
| 26 | 1 | 0 | -1.438292 | 4.233716  | 0.358434  |
| 27 | 1 | 0 | -1.962903 | 3.578895  | -1.207234 |
| 28 | 1 | 0 | 1.436959  | 4.234342  | 0.358335  |
| 29 | 1 | 0 | 1.961748  | 3.579750  | -1.207373 |
| 30 | 1 | 0 | -0.001047 | 5.812752  | -0.944702 |
| 31 | 1 | 0 | -0.000857 | 4.699556  | -2.330618 |
| 32 | 7 | 0 | 3.586617  | -0.466294 | 0.213893  |
| 33 | 7 | 0 | -3.586331 | -0.466417 | 0.211584  |
| 34 | 6 | 0 | 2.270020  | -2.422426 | -0.276623 |
| 35 | 1 | 0 | 1.283282  | -2.856644 | -0.370177 |
| 36 | 6 | 0 | -2.269458 | -2.423662 | -0.273763 |
| 37 | 1 | 0 | -1.282681 | -2.858207 | -0.365404 |

## J-TS

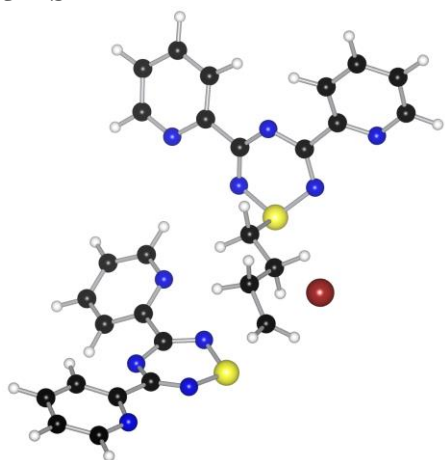

HF (B3LYP/6-31+G(d,p)) = -4997.0940673 Hartrees

HF (M062X/6-31+G(d,p)//B3LYP/6-31+G(d,p)) = -4996.497142 Hartrees

Imaginary Frequencies: 1 (-315.30  $\text{cm}^{-1}$ )

Zero point correction = 0.484541 (Hartree/Particle)

Thermal correction = 0.405664 Hartrees

Coordinates from last standard orientation:

| Center Number | Atomic Number | Atomic Type | Coordinates (Angstroms) |           |           |
|---------------|---------------|-------------|-------------------------|-----------|-----------|
|               |               |             | X                       | Y         | Z         |
| 1             | 7             | 0           | 3.538042                | -0.940937 | -1.364793 |
| 2             | 6             | 0           | 4.311221                | -0.618682 | -0.345455 |

|    |    |   |           |           |           |
|----|----|---|-----------|-----------|-----------|
| 3  | 6  | 0 | 3.677203  | 1.608387  | -0.096165 |
| 4  | 7  | 0 | 2.790537  | 1.685263  | -1.072972 |
| 5  | 16 | 0 | 2.302150  | 0.173187  | -1.671579 |
| 6  | 7  | 0 | 4.355583  | 0.534047  | 0.368362  |
| 7  | 6  | 0 | 0.256584  | -1.572786 | -0.878073 |
| 8  | 6  | 0 | -0.923973 | -1.822976 | 0.075030  |
| 9  | 1  | 0 | 0.922387  | -2.441331 | -0.873349 |
| 10 | 1  | 0 | -0.130787 | -1.442238 | -1.895179 |
| 11 | 6  | 0 | -1.894500 | -2.835614 | -0.452725 |
| 12 | 1  | 0 | -0.564425 | -2.155550 | 1.053837  |
| 13 | 1  | 0 | -1.451740 | -0.872507 | 0.235595  |
| 14 | 1  | 0 | -2.738178 | -3.149604 | 0.144561  |
| 15 | 1  | 0 | -1.707693 | -3.365938 | -1.371927 |
| 16 | 35 | 0 | -0.747322 | -5.001525 | 0.477421  |
| 17 | 7  | 0 | -2.518747 | 0.139996  | -1.591646 |
| 18 | 6  | 0 | -3.168829 | 1.141646  | -1.047770 |
| 19 | 6  | 0 | -5.010646 | -0.006930 | -0.195613 |
| 20 | 7  | 0 | -4.684893 | -1.226011 | -0.546184 |
| 21 | 16 | 0 | -3.393051 | -1.335279 | -1.670881 |
| 22 | 7  | 0 | -4.405823 | 1.183896  | -0.486017 |
| 23 | 6  | 0 | 0.988027  | -0.294832 | -0.469334 |
| 24 | 1  | 0 | 0.308743  | 0.567261  | -0.508964 |
| 25 | 1  | 0 | 1.460587  | -0.365065 | 0.515625  |
| 26 | 6  | 0 | -6.206963 | 0.114520  | 0.714773  |
| 27 | 6  | 0 | -7.541857 | 1.414354  | 2.246165  |
| 28 | 6  | 0 | -8.074893 | -0.841130 | 1.651381  |
| 29 | 6  | 0 | -8.384558 | 0.310485  | 2.381923  |
| 30 | 1  | 0 | -7.737853 | 2.333954  | 2.791943  |
| 31 | 1  | 0 | -8.709936 | -1.723451 | 1.723514  |
| 32 | 1  | 0 | -9.256397 | 0.334712  | 3.029604  |
| 33 | 6  | 0 | -2.426264 | 2.453389  | -1.017005 |
| 34 | 6  | 0 | -2.445447 | 4.860702  | -0.991725 |
| 35 | 6  | 0 | -0.415331 | 3.583067  | -0.992323 |
| 36 | 6  | 0 | -1.049794 | 4.829054  | -0.988890 |
| 37 | 1  | 0 | -2.979633 | 5.807728  | -0.987838 |
| 38 | 1  | 0 | 0.670803  | 3.509009  | -0.966644 |
| 39 | 1  | 0 | -0.460602 | 5.741401  | -0.979924 |
| 40 | 6  | 0 | 5.316903  | -1.658368 | 0.073538  |
| 41 | 6  | 0 | 6.775361  | -2.592188 | 1.745069  |
| 42 | 6  | 0 | 6.475234  | -3.576528 | -0.417189 |
| 43 | 6  | 0 | 7.082878  | -3.609653 | 0.841805  |
| 44 | 1  | 0 | 7.217014  | -2.577281 | 2.737791  |
| 45 | 1  | 0 | 6.691252  | -4.349433 | -1.152831 |
| 46 | 1  | 0 | 7.768532  | -4.411063 | 1.100373  |
| 47 | 6  | 0 | 4.045889  | 2.918290  | 0.552335  |
| 48 | 6  | 0 | 5.528412  | 4.227424  | 1.926805  |
| 49 | 6  | 0 | 3.556387  | 5.132339  | 0.914314  |
| 50 | 6  | 0 | 4.689246  | 5.320905  | 1.711630  |
| 51 | 1  | 0 | 6.421054  | 4.323346  | 2.539026  |
| 52 | 1  | 0 | 2.872238  | 5.958808  | 0.728604  |
| 53 | 1  | 0 | 4.898491  | 6.293097  | 2.148019  |
| 54 | 6  | 0 | -3.147563 | 3.657209  | -0.992728 |
| 55 | 1  | 0 | -4.230081 | 3.618197  | -0.975464 |
| 56 | 6  | 0 | -6.439225 | 1.319414  | 1.399740  |
| 57 | 1  | 0 | -5.749683 | 2.140693  | 1.251197  |
| 58 | 6  | 0 | 5.885055  | -1.593623 | 1.355207  |
| 59 | 1  | 0 | 5.612133  | -0.778699 | 2.014030  |
| 60 | 6  | 0 | 5.203218  | 3.005513  | 1.341415  |
| 61 | 1  | 0 | 5.814416  | 2.121714  | 1.473357  |
| 62 | 7  | 0 | 3.234400  | 3.968324  | 0.344188  |
| 63 | 7  | 0 | 5.609144  | -2.634779 | -0.798752 |
| 64 | 7  | 0 | -7.021100 | -0.947438 | 0.838601  |
| 65 | 7  | 0 | -1.082943 | 2.421749  | -1.016808 |

---

**J**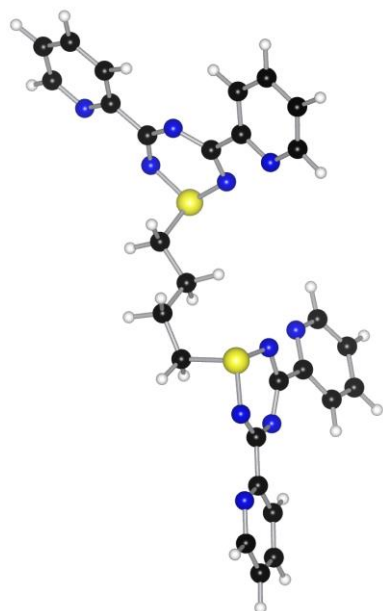

HF (B3LYP/6-31+G(d,p)) = -2425.2797189 Hartrees

HF (M062X/6-31+G(d,p)//B3LYP/6-31+G(d,p)) = -2424.566392 Hartrees

Imaginary Frequencies: none found

Zero point correction = 0.486086 (Hartree/Particle)

Thermal correction = 0.409675 Hartrees

Coordinates from last standard orientation:

| Center<br>Number | Atomic<br>Number | Atomic<br>Type | Coordinates (Angstroms) |           |           |
|------------------|------------------|----------------|-------------------------|-----------|-----------|
|                  |                  |                | X                       | Y         | Z         |
| 1                | 7                | 0              | 2.726311                | 0.884544  | 0.708890  |
| 2                | 6                | 0              | 3.776725                | 1.055720  | -0.083375 |
| 3                | 6                | 0              | 4.888658                | -0.952989 | 0.341158  |
| 4                | 7                | 0              | 4.021236                | -1.498243 | 1.179162  |
| 5                | 16               | 0              | 2.536573                | -0.698781 | 1.247609  |
| 6                | 7                | 0              | 4.788173                | 0.203831  | -0.357743 |
| 7                | 6                | 0              | 0.167550                | -1.090433 | -0.206038 |
| 8                | 6                | 0              | -0.522596               | -1.679619 | -1.450171 |
| 9                | 1                | 0              | 0.075990                | -0.000031 | -0.199448 |
| 10               | 1                | 0              | -0.336121               | -1.442402 | 0.701914  |
| 11               | 6                | 0              | -2.050194               | -1.572425 | -1.469415 |
| 12               | 1                | 0              | -0.111721               | -1.215654 | -2.356279 |
| 13               | 1                | 0              | -0.288333               | -2.750588 | -1.524072 |
| 14               | 1                | 0              | -2.516897               | -2.018349 | -0.585692 |
| 15               | 1                | 0              | -2.467747               | -2.041629 | -2.366573 |
| 16               | 7                | 0              | -2.566707               | 0.716329  | 0.007283  |
| 17               | 6                | 0              | -3.602287               | 0.373655  | 0.763304  |
| 18               | 6                | 0              | -5.081648               | -0.275840 | -0.921245 |
| 19               | 7                | 0              | -4.295338               | -0.098435 | -1.971432 |
| 20               | 16               | 0              | -2.676342               | 0.174999  | -1.580838 |
| 21               | 7                | 0              | -4.785919               | -0.160868 | 0.396991  |
| 22               | 6                | 0              | 1.641372                | -1.496920 | -0.168624 |
| 23               | 1                | 0              | 1.773726                | -2.570426 | 0.007050  |
| 24               | 1                | 0              | 2.182552                | -1.216991 | -1.078075 |
| 25               | 6                | 0              | -6.516118               | -0.618480 | -1.224588 |
| 26               | 6                | 0              | -8.734743               | -1.184063 | -0.483459 |
| 27               | 6                | 0              | -8.142932               | -0.999208 | -2.797503 |

|    |   |   |            |           |           |
|----|---|---|------------|-----------|-----------|
| 28 | 6 | 0 | -9.114411  | -1.253863 | -1.823063 |
| 29 | 1 | 0 | -9.452009  | -1.378289 | 0.308860  |
| 30 | 1 | 0 | -8.398398  | -1.046321 | -3.854470 |
| 31 | 1 | 0 | -10.131188 | -1.500648 | -2.112760 |
| 32 | 6 | 0 | -3.455927  | 0.682337  | 2.225841  |
| 33 | 6 | 0 | -4.415157  | 1.257146  | 4.354233  |
| 34 | 6 | 0 | -2.058278  | 0.967168  | 4.022615  |
| 35 | 6 | 0 | -3.122802  | 1.266776  | 4.878921  |
| 36 | 1 | 0 | -5.271890  | 1.483487  | 4.982444  |
| 37 | 1 | 0 | -1.036654  | 0.953884  | 4.396891  |
| 38 | 1 | 0 | -2.937370  | 1.496941  | 5.923518  |
| 39 | 6 | 0 | 3.890737   | 2.414832  | -0.714960 |
| 40 | 6 | 0 | 5.220359   | 4.185502  | -1.654281 |
| 41 | 6 | 0 | 2.835404   | 4.314053  | -1.451236 |
| 42 | 6 | 0 | 4.040824   | 4.905585  | -1.842938 |
| 43 | 1 | 0 | 6.179994   | 4.604865  | -1.942703 |
| 44 | 1 | 0 | 1.892613   | 4.839331  | -1.591038 |
| 45 | 1 | 0 | 4.047114   | 5.897966  | -2.283212 |
| 46 | 6 | 0 | 6.187968   | -1.693808 | 0.164312  |
| 47 | 6 | 0 | 8.354864   | -1.905186 | -0.862003 |
| 48 | 6 | 0 | 7.497549   | -3.498476 | 0.707791  |
| 49 | 6 | 0 | 8.532774   | -3.082379 | -0.136575 |
| 50 | 1 | 0 | 9.127867   | -1.543869 | -1.534274 |
| 51 | 1 | 0 | 7.595879   | -4.413707 | 1.288685  |
| 52 | 1 | 0 | 9.443041   | -3.668245 | -0.219488 |
| 53 | 6 | 0 | 5.147092   | 2.914667  | -1.086248 |
| 54 | 1 | 0 | 6.030108   | 2.310105  | -0.921061 |
| 55 | 6 | 0 | 7.164794   | -1.194935 | -0.710286 |
| 56 | 1 | 0 | 6.972783   | -0.276994 | -1.250467 |
| 57 | 6 | 0 | -4.589229  | 0.952742  | 3.005105  |
| 58 | 1 | 0 | -5.569850  | 0.926348  | 2.546144  |
| 59 | 6 | 0 | -7.414662  | -0.858551 | -0.174519 |
| 60 | 1 | 0 | -7.064802  | -0.791764 | 0.847511  |
| 61 | 7 | 0 | -6.874585  | -0.693899 | -2.516285 |
| 62 | 7 | 0 | -2.209648  | 0.683753  | 2.725741  |
| 63 | 7 | 0 | 2.751786   | 3.101643  | -0.897025 |
| 64 | 7 | 0 | 6.350903   | -2.832163 | 0.857526  |

---

**K**

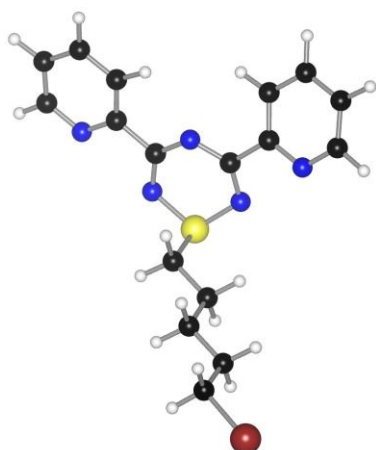

HF (B3LYP/6-31+G(d,p)) = -3902.3205639 Hartrees

HF (M062X/6-31+G(d,p)//B3LYP/6-31+G(d,p)) = -3901.969343 Hartrees

Imaginary Frequencies: none found

Zero point correction = 0.329090 (Hartree/Particle)

Thermal correction = 0.271126 Hartrees

Coordinates from last standard orientation:

| Center<br>Number | Atomic<br>Number | Atomic<br>Type | Coordinates (Angstroms) |           |           |
|------------------|------------------|----------------|-------------------------|-----------|-----------|
|                  |                  |                | X                       | Y         | Z         |
| 1                | 7                | 0              | 0.907102                | 0.825001  | 1.570667  |
| 2                | 6                | 0              | 1.743895                | 1.147529  | 0.592301  |
| 3                | 6                | 0              | 2.865165                | -0.890625 | 0.382614  |
| 4                | 7                | 0              | 2.199986                | -1.589026 | 1.289817  |
| 5                | 16               | 0              | 0.802544                | -0.831878 | 1.848556  |
| 6                | 7                | 0              | 2.637789                | 0.371566  | -0.056976 |
| 7                | 6                | 0              | 1.741585                | 2.597153  | 0.196823  |
| 8                | 6                | 0              | 2.864940                | 4.528359  | -0.694048 |
| 9                | 6                | 0              | 0.588713                | 4.575543  | 0.055532  |
| 10               | 1                | 0              | 3.744651                | 5.009170  | -1.112086 |
| 11               | 1                | 0              | -0.349889               | 5.100422  | 0.222341  |
| 12               | 6                | 0              | 4.062749                | -1.571917 | -0.224007 |
| 13               | 6                | 0              | 5.409978                | -3.426680 | -0.326093 |
| 14               | 6                | 0              | 5.912968                | -1.576982 | -1.763110 |
| 15               | 1                | 0              | 5.617674                | -4.426615 | 0.050204  |
| 16               | 1                | 0              | 6.512537                | -1.096376 | -2.530886 |
| 17               | 6                | 0              | 1.688528                | 5.248258  | -0.486575 |
| 18               | 1                | 0              | 1.617124                | 6.301842  | -0.738411 |
| 19               | 6                | 0              | 6.224322                | -2.858909 | -1.312373 |
| 20               | 1                | 0              | 7.070247                | -3.410726 | -1.710552 |
| 21               | 6                | 0              | -0.438257               | -1.364006 | 0.576149  |
| 22               | 6                | 0              | -1.814345               | -0.766000 | 0.868533  |
| 23               | 1                | 0              | -0.433858               | -2.457796 | 0.640356  |
| 24               | 1                | 0              | -0.046508               | -1.063296 | -0.400385 |
| 25               | 6                | 0              | -2.872356               | -1.245926 | -0.135719 |
| 26               | 1                | 0              | -2.127312               | -1.044420 | 1.883744  |
| 27               | 1                | 0              | -1.747143               | 0.327264  | 0.845760  |
| 28               | 1                | 0              | -2.564311               | -0.964360 | -1.151974 |
| 29               | 1                | 0              | -2.925851               | -2.343246 | -0.117859 |
| 30               | 6                | 0              | -4.262603               | -0.657253 | 0.162709  |
| 31               | 1                | 0              | -4.215938               | 0.437662  | 0.144009  |
| 32               | 1                | 0              | -4.582892               | -0.945554 | 1.170787  |
| 33               | 6                | 0              | -5.276431               | -1.144742 | -0.854758 |
| 34               | 1                | 0              | -5.024132               | -0.829036 | -1.868003 |
| 35               | 1                | 0              | -5.386346               | -2.229879 | -0.835773 |
| 36               | 35               | 0              | -7.088901               | -0.439683 | -0.535347 |
| 37               | 6                | 0              | 4.815730                | -0.917744 | -1.210290 |
| 38               | 1                | 0              | 4.527713                | 0.077199  | -1.524107 |
| 39               | 6                | 0              | 2.893348                | 3.177045  | -0.353271 |
| 40               | 1                | 0              | 3.777896                | 2.569157  | -0.496860 |
| 41               | 7                | 0              | 4.353067                | -2.810059 | 0.206459  |
| 42               | 7                | 0              | 0.604856                | 3.283793  | 0.396241  |

L

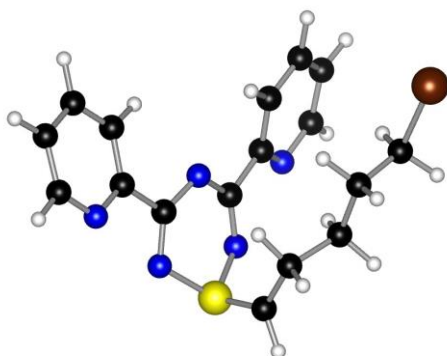

HF (B3LYP/6-31+G(d,p)) = -3901.7453839 Hartrees

HF (M062X/6-31+G(d,p)//B3LYP/6-31+G(d,p)) = -3901.4554370 Hartrees

Imaginary Frequencies: none found

Zero point correction = 0.314151 (Hartree/Particle)

Thermal correction = 0.257895 Hartrees

Coordinates from last standard orientation:

| Center Number | Atomic Number | Atomic Type | Coordinates (Angstroms) |           |           |
|---------------|---------------|-------------|-------------------------|-----------|-----------|
|               |               |             | X                       | Y         | Z         |
| 1             | 7             | 0           | 0.903816                | 2.383006  | 1.116227  |
| 2             | 6             | 0           | 0.704849                | 1.694715  | 0.009636  |
| 3             | 6             | 0           | 2.525942                | 0.267125  | 0.178206  |
| 4             | 7             | 0           | 3.012451                | 0.708921  | 1.319816  |
| 5             | 16            | 0           | 1.895034                | 1.592081  | 2.317492  |
| 6             | 7             | 0           | 1.387592                | 0.625904  | -0.471078 |
| 7             | 6             | 0           | -0.434128               | 2.138089  | -0.876624 |
| 8             | 6             | 0           | -1.992874               | 3.727657  | -1.461487 |
| 9             | 6             | 0           | -2.021032               | 1.644686  | -2.634329 |
| 10            | 1             | 0           | -2.383604               | 4.729796  | -1.283168 |
| 11            | 1             | 0           | -2.433806               | 0.967412  | -3.378321 |
| 12            | 6             | 0           | 3.378307                | -0.722244 | -0.576842 |
| 13            | 6             | 0           | 5.082664                | -2.268695 | -0.585674 |
| 14            | 6             | 0           | 3.975271                | -1.806215 | -2.653458 |
| 15            | 1             | 0           | 5.832599                | -2.802463 | -0.001298 |
| 16            | 1             | 0           | 3.835291                | -1.956476 | -3.721553 |
| 17            | 6             | 0           | -2.568650               | 2.916108  | -2.442292 |
| 18            | 1             | 0           | -3.413531               | 3.269160  | -3.027187 |
| 19            | 6             | 0           | 4.958693                | -2.512883 | -1.955694 |
| 20            | 1             | 0           | 5.607430                | -3.230381 | -2.450914 |
| 21            | 6             | 0           | 0.991812                | 0.486812  | 3.174115  |
| 22            | 6             | 0           | 0.191048                | -0.647034 | 2.600084  |
| 23            | 1             | 0           | 0.991753                | 0.691228  | 4.240334  |
| 24            | 6             | 0           | -1.256389               | -0.274830 | 2.186579  |
| 25            | 1             | 0           | 0.703061                | -1.057350 | 1.718633  |
| 26            | 1             | 0           | 0.147301                | -1.468719 | 3.331877  |
| 27            | 1             | 0           | -1.835339               | -0.022312 | 3.085893  |
| 28            | 1             | 0           | -1.215145               | 0.637712  | 1.584543  |
| 29            | 6             | 0           | -1.971450               | -1.387593 | 1.395952  |
| 30            | 1             | 0           | -2.170297               | -2.254682 | 2.038525  |
| 31            | 1             | 0           | -1.323486               | -1.731570 | 0.580985  |
| 32            | 6             | 0           | -3.264788               | -0.849163 | 0.823165  |
| 33            | 1             | 0           | -3.953175               | -0.508631 | 1.597475  |
| 34            | 1             | 0           | -3.095919               | -0.046249 | 0.106473  |
| 35            | 35            | 0           | -4.325868               | -2.197239 | -0.197257 |



|    |   |   |           |           |           |
|----|---|---|-----------|-----------|-----------|
| 36 | 6 | 0 | 3.175770  | -0.904003 | -1.959009 |
| 37 | 1 | 0 | 2.395304  | -0.330787 | -2.443986 |
| 38 | 6 | 0 | -0.937217 | 1.254774  | -1.852958 |
| 39 | 1 | 0 | -0.464993 | 0.286535  | -1.965290 |
| 40 | 7 | 0 | 4.324134  | -1.404047 | 0.094696  |
| 41 | 7 | 0 | -0.965931 | 3.359645  | -0.688965 |

**L1 (productive conformer – leading to M-TS)**

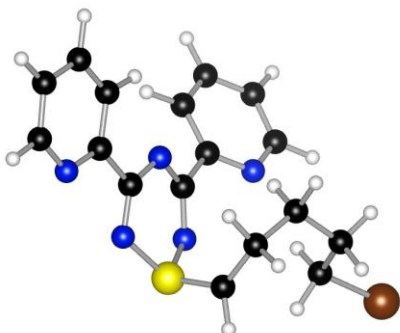

HF (B3LYP/6-31+G(d,p)) = -3901.7492789 Hartrees

HF (M062X/6-31+G(d,p)//B3LYP/6-31+G(d,p)) = -3901.4567362 Hartrees

Imaginary Frequencies: none found

Zero point correction = 0.314549 (Hartree/Particle)

Thermal correction = 0.259971 Hartrees

Coordinates from last standard orientation:

| Center Number | Atomic Number | Atomic Type | Coordinates (Angstroms) |           |           |
|---------------|---------------|-------------|-------------------------|-----------|-----------|
|               |               |             | X                       | Y         | Z         |
| 1             | 7             | 0           | 2.127290                | -1.392581 | -1.342668 |
| 2             | 6             | 0           | 2.443508                | -0.401280 | -0.536816 |
| 3             | 6             | 0           | 0.482267                | 0.819357  | -0.735238 |
| 4             | 7             | 0           | -0.168538               | 0.028246  | -1.562652 |
| 5             | 16            | 0           | 0.434522                | -1.606855 | -1.676530 |
| 6             | 7             | 0           | 1.694875                | 0.668935  | -0.154266 |
| 7             | 6             | 0           | -0.266366               | -2.521262 | -0.474146 |
| 8             | 6             | 0           | -0.124046               | -2.362819 | 1.019122  |
| 9             | 6             | 0           | -0.962250               | -1.267304 | 1.721054  |
| 10            | 1             | 0           | -0.379527               | -3.330591 | 1.476919  |
| 11            | 1             | 0           | 0.929116                | -2.177162 | 1.288392  |
| 12            | 1             | 0           | -0.725575               | -1.303844 | 2.796077  |
| 13            | 1             | 0           | -0.637567               | -0.280809 | 1.377240  |
| 14            | 6             | 0           | -2.496562               | -1.366483 | 1.583309  |
| 15            | 1             | 0           | -2.950068               | -0.669085 | 2.298544  |
| 16            | 1             | 0           | -2.837446               | -2.372748 | 1.865792  |
| 17            | 6             | 0           | -2.997365               | -1.023208 | 0.189676  |
| 18            | 1             | 0           | -2.784025               | -1.786976 | -0.550575 |
| 19            | 35            | 0           | -5.004762               | -0.861397 | 0.178008  |
| 20            | 1             | 0           | -2.645112               | -0.054441 | -0.162262 |
| 21            | 1             | 0           | -0.682901               | -3.437917 | -0.881302 |
| 22            | 6             | 0           | 3.854726                | -0.382490 | 0.002162  |
| 23            | 6             | 0           | 5.545051                | 0.642639  | 1.393383  |
| 24            | 6             | 0           | 5.955855                | -1.317843 | 0.089440  |
| 25            | 6             | 0           | 6.433277                | -0.354726 | 0.982085  |
| 26            | 1             | 0           | 5.861186                | 1.415141  | 2.090808  |
| 27            | 1             | 0           | 6.614050                | -2.114836 | -0.257654 |
| 28            | 1             | 0           | 7.459093                | -0.390474 | 1.338878  |
| 29            | 6             | 0           | -0.194338               | 2.128052  | -0.422162 |

|    |   |   |           |           |           |
|----|---|---|-----------|-----------|-----------|
| 30 | 6 | 0 | -0.082141 | 4.511504  | -0.062594 |
| 31 | 6 | 0 | -2.138183 | 3.287423  | 0.008279  |
| 32 | 6 | 0 | -1.471043 | 4.510286  | 0.099955  |
| 33 | 1 | 0 | 0.483402  | 5.437947  | 0.005298  |
| 34 | 1 | 0 | -3.217159 | 3.235343  | 0.148955  |
| 35 | 1 | 0 | -2.021241 | 5.425152  | 0.301826  |
| 36 | 6 | 0 | 4.244752  | 0.632413  | 0.898206  |
| 37 | 1 | 0 | 3.511658  | 1.378352  | 1.178539  |
| 38 | 6 | 0 | 0.566157  | 3.306186  | -0.313421 |
| 39 | 1 | 0 | 1.641877  | 3.243897  | -0.431045 |
| 40 | 7 | 0 | -1.529028 | 2.126170  | -0.257381 |
| 41 | 7 | 0 | 4.708935  | -1.345207 | -0.389321 |

**L2 (conformation of L leading directly from direct deprotonation of G)**

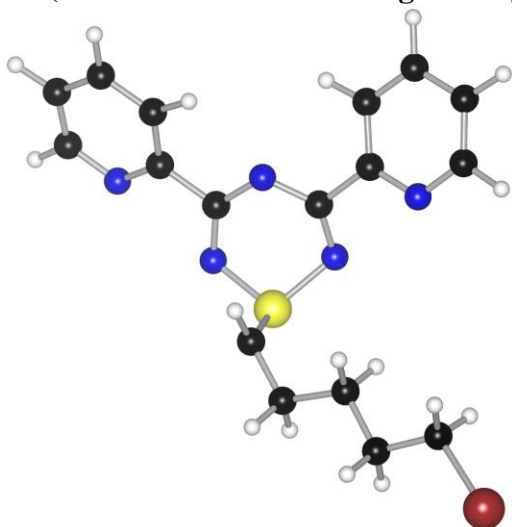

HF (B3LYP/6-31+G(d,p)) = -3901.7430179 Hartrees

HF (M062X/6-31+G(d,p)//B3LYP/6-31+G(d,p)) = -3901.4474875 Hartrees

Imaginary Frequencies: none found

Zero point correction = 0.314074 (Hartree/Particle)

Thermal correction = 0.257226 Hartrees

Coordinates from last standard orientation:

| Center Number | Atomic Number | Atomic Type | Coordinates (Angstroms) |           |           |
|---------------|---------------|-------------|-------------------------|-----------|-----------|
|               |               |             | X                       | Y         | Z         |
| 1             | 7             | 0           | -0.565332               | 0.273907  | -1.383752 |
| 2             | 6             | 0           | -1.368492               | 0.929069  | -0.574106 |
| 3             | 6             | 0           | -2.942832               | -0.751817 | -0.290983 |
| 4             | 7             | 0           | -2.335101               | -1.730998 | -0.934062 |
| 5             | 16            | 0           | -0.661661               | -1.484699 | -1.218480 |
| 6             | 7             | 0           | -2.505494               | 0.492124  | 0.027947  |
| 7             | 6             | 0           | -1.052501               | 2.378429  | -0.329053 |
| 8             | 6             | 0           | -1.790712               | 4.642574  | 0.081843  |
| 9             | 6             | 0           | 0.517660                | 4.049056  | -0.121701 |
| 10            | 1             | 0           | -2.583435               | 5.371285  | 0.235751  |
| 11            | 1             | 0           | 1.575857                | 4.311530  | -0.116617 |
| 12            | 6             | 0           | -4.360146               | -1.030076 | 0.147468  |
| 13            | 6             | 0           | -6.262797               | -2.317177 | 0.014383  |
| 14            | 6             | 0           | -6.269275               | -0.455052 | 1.512930  |
| 15            | 1             | 0           | -6.752806               | -3.174487 | -0.447826 |

|    |    |   |           |           |           |
|----|----|---|-----------|-----------|-----------|
| 16 | 1  | 0 | -6.750502 | 0.177528  | 2.255414  |
| 17 | 6  | 0 | -0.449238 | 5.037408  | 0.076758  |
| 18 | 1  | 0 | -0.158132 | 6.073214  | 0.228870  |
| 19 | 6  | 0 | -6.945029 | -1.545293 | 0.957782  |
| 20 | 1  | 0 | -7.963864 | -1.792924 | 1.243295  |
| 21 | 6  | 0 | 0.084182  | -2.036091 | 0.174008  |
| 22 | 6  | 0 | 1.550167  | -2.376328 | 0.093326  |
| 23 | 1  | 0 | -0.306418 | -1.669343 | 1.123423  |
| 24 | 6  | 0 | 2.489754  | -1.151458 | 0.233784  |
| 25 | 1  | 0 | 1.803474  | -3.105169 | 0.880525  |
| 26 | 1  | 0 | 1.768319  | -2.874086 | -0.864198 |
| 27 | 1  | 0 | 2.260649  | -0.450007 | -0.576968 |
| 28 | 1  | 0 | 2.238948  | -0.623785 | 1.164304  |
| 29 | 6  | 0 | 3.990619  | -1.498466 | 0.232627  |
| 30 | 1  | 0 | 4.250904  | -2.053270 | -0.677735 |
| 31 | 1  | 0 | 4.235360  | -2.145635 | 1.084419  |
| 32 | 6  | 0 | 4.793765  | -0.218699 | 0.302465  |
| 33 | 1  | 0 | 4.629120  | 0.418466  | -0.565910 |
| 34 | 1  | 0 | 4.588891  | 0.347753  | 1.210956  |
| 35 | 35 | 0 | 6.770085  | -0.491543 | 0.341271  |
| 36 | 7  | 0 | 0.239733  | 2.757381  | -0.326701 |
| 37 | 7  | 0 | -5.008017 | -2.082999 | -0.381508 |
| 38 | 6  | 0 | -2.095984 | 3.299772  | -0.114531 |
| 39 | 1  | 0 | -3.115827 | 2.933418  | -0.108805 |
| 40 | 6  | 0 | -4.967578 | -0.188851 | 1.100145  |
| 41 | 1  | 0 | -4.396863 | 0.646789  | 1.485952  |

## M-TS

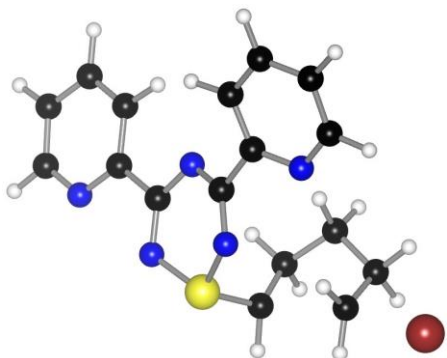

HF (B3LYP/6-31+G(d,p)) = -3901.7346138 Hartrees

HF (M062X/6-31+G(d,p)//B3LYP/6-31+G(d,p)) = -3901.4402083 Hartrees

Imaginary Frequencies: 1 (-394.78 cm<sup>-1</sup>)

Zero point correction = 0.314106 (Hartree/Particle)

Thermal correction = 0.259673 Hartrees

## Coordinates from last standard orientation:

| Center Number | Atomic Number | Atomic Type | Coordinates (Angstroms) |           |           |
|---------------|---------------|-------------|-------------------------|-----------|-----------|
|               |               |             | X                       | Y         | Z         |
| 1             | 7             | 0           | 1.964787                | -1.470887 | -1.219166 |
| 2             | 6             | 0           | 2.396977                | -0.454718 | -0.501294 |
| 3             | 6             | 0           | 0.511388                | 0.888759  | -0.640008 |
| 4             | 7             | 0           | -0.233861               | 0.114732  | -1.401720 |
| 5             | 16            | 0           | 0.263919                | -1.525833 | -1.498963 |
| 6             | 7             | 0           | 1.743004                | 0.675854  | -0.124311 |
| 7             | 6             | 0           | -0.518324               | -2.333343 | -0.198477 |
| 8             | 6             | 0           | -0.121615               | -2.187188 | 1.255729  |

|    |    |   |           |           |           |
|----|----|---|-----------|-----------|-----------|
| 9  | 6  | 0 | -1.007062 | -1.146782 | 1.958684  |
| 10 | 1  | 0 | -0.263425 | -3.162622 | 1.742953  |
| 11 | 1  | 0 | 0.941232  | -1.934635 | 1.380703  |
| 12 | 1  | 0 | -0.876310 | -1.180187 | 3.050731  |
| 13 | 1  | 0 | -0.720079 | -0.139862 | 1.637215  |
| 14 | 6  | 0 | -2.485647 | -1.382734 | 1.599164  |
| 15 | 1  | 0 | -3.085327 | -0.574567 | 2.027361  |
| 16 | 1  | 0 | -2.845393 | -2.317618 | 2.047231  |
| 17 | 6  | 0 | -2.723801 | -1.414710 | 0.108587  |
| 18 | 1  | 0 | -2.997625 | -2.318465 | -0.402570 |
| 19 | 35 | 0 | -5.106233 | -0.857762 | -0.002291 |
| 20 | 1  | 0 | -2.461839 | -0.555417 | -0.490011 |
| 21 | 1  | 0 | -0.759085 | -3.337379 | -0.546707 |
| 22 | 6  | 0 | 3.845323  | -0.499877 | -0.074484 |
| 23 | 6  | 0 | 5.692112  | 0.459900  | 1.148928  |
| 24 | 6  | 0 | 5.888413  | -1.554325 | -0.124721 |
| 25 | 6  | 0 | 6.486638  | -0.596706 | 0.698946  |
| 26 | 1  | 0 | 6.105472  | 1.229946  | 1.795815  |
| 27 | 1  | 0 | 6.471232  | -2.396108 | -0.498322 |
| 28 | 1  | 0 | 7.533829  | -0.682117 | 0.975475  |
| 29 | 6  | 0 | -0.082996 | 2.238643  | -0.341441 |
| 30 | 6  | 0 | 0.142804  | 4.604402  | 0.043778  |
| 31 | 6  | 0 | -1.977009 | 3.485461  | 0.039665  |
| 32 | 6  | 0 | -1.247318 | 4.670659  | 0.167843  |
| 33 | 1  | 0 | 0.751747  | 5.500146  | 0.139076  |
| 34 | 1  | 0 | -3.060659 | 3.485291  | 0.145222  |
| 35 | 1  | 0 | -1.754873 | 5.610839  | 0.364828  |
| 36 | 6  | 0 | 4.357460  | 0.513442  | 0.756509  |
| 37 | 1  | 0 | 3.692898  | 1.307880  | 1.071876  |
| 38 | 6  | 0 | 0.737666  | 3.369514  | -0.204353 |
| 39 | 1  | 0 | 1.811396  | 3.255066  | -0.297984 |
| 40 | 7  | 0 | -1.418550 | 2.298516  | -0.214390 |
| 41 | 7  | 0 | 4.607793  | -1.520726 | -0.502935 |

---

**M**

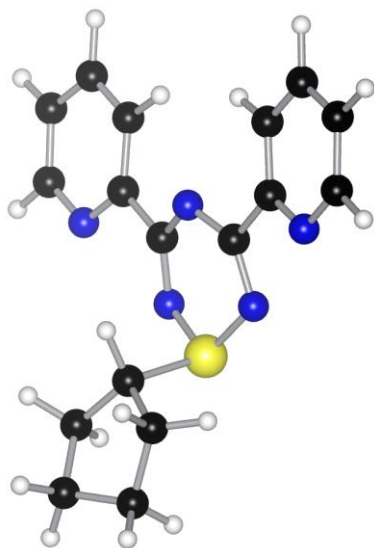

HF (B3LYP/6-31+G(d,p)) = -1329.9831698 Hartrees

HF (M062X/6-31+G(d,p)//B3LYP/6-31+G(d,p)) = -1329.5669773 Hartrees

Imaginary Frequencies: none found

Zero point correction = 0.317296 (Hartree/Particle)

Thermal correction = 0.265125 Hartrees

Coordinates from last standard orientation:

| Center<br>Number | Atomic<br>Number | Atomic<br>Type | Coordinates (Angstroms) |           |           |
|------------------|------------------|----------------|-------------------------|-----------|-----------|
|                  |                  |                | X                       | Y         | Z         |
| 1                | 7                | 0              | 1.362252                | 0.679506  | 0.993476  |
| 2                | 6                | 0              | 1.182809                | -0.465686 | 0.350635  |
| 3                | 6                | 0              | -1.150426               | -0.521993 | 0.358468  |
| 4                | 7                | 0              | -1.383078               | 0.613953  | 0.998802  |
| 5                | 16               | 0              | -0.032027               | 1.612830  | 1.130992  |
| 6                | 7                | 0              | 0.028927                | -1.046136 | -0.050288 |
| 7                | 6                | 0              | 2.432232                | -1.259566 | 0.079894  |
| 8                | 6                | 0              | 3.519050                | -3.325701 | -0.506076 |
| 9                | 6                | 0              | 4.723523                | -1.306813 | -0.044996 |
| 10               | 1                | 0              | 3.480898                | -4.377679 | -0.774128 |
| 11               | 1                | 0              | 5.655081                | -0.751433 | 0.046785  |
| 12               | 6                | 0              | -2.359720               | -1.378990 | 0.097204  |
| 13               | 6                | 0              | -3.343341               | -3.500296 | -0.473838 |
| 14               | 6                | 0              | -4.646174               | -1.541928 | -0.019825 |
| 15               | 1                | 0              | -3.253140               | -4.550542 | -0.736196 |
| 16               | 1                | 0              | -5.604093               | -1.033356 | 0.071929  |
| 17               | 6                | 0              | 4.740026                | -2.662456 | -0.389817 |
| 18               | 1                | 0              | 5.682075                | -3.173442 | -0.563345 |
| 19               | 6                | 0              | -4.595702               | -2.898571 | -0.357408 |
| 20               | 1                | 0              | -5.511355               | -3.457172 | -0.525394 |
| 21               | 6                | 0              | -0.067546               | 2.532416  | -0.497002 |
| 22               | 6                | 0              | -1.345401               | 3.413606  | -0.566022 |
| 23               | 6                | 0              | 1.143750                | 3.493635  | -0.582699 |
| 24               | 1                | 0              | -0.040434               | 1.749523  | -1.258861 |
| 25               | 6                | 0              | -0.836684               | 4.838297  | -0.883343 |
| 26               | 1                | 0              | -1.873372               | 3.406187  | 0.395512  |
| 27               | 1                | 0              | -2.054861               | 3.032083  | -1.304199 |
| 28               | 6                | 0              | 0.566412                | 4.882136  | -0.256257 |
| 29               | 1                | 0              | 1.523814                | 3.475336  | -1.610986 |
| 30               | 1                | 0              | 1.976202                | 3.191021  | 0.060364  |
| 31               | 1                | 0              | -0.760815               | 4.979351  | -1.969101 |
| 32               | 1                | 0              | -1.508332               | 5.613130  | -0.500288 |
| 33               | 1                | 0              | 1.188055                | 5.696565  | -0.641611 |
| 34               | 1                | 0              | 0.489216                | 5.015869  | 0.830607  |
| 35               | 6                | 0              | -2.204205               | -2.729491 | -0.247342 |
| 36               | 1                | 0              | -1.208150               | -3.144217 | -0.330488 |
| 37               | 6                | 0              | 2.343461                | -2.614269 | -0.271576 |
| 38               | 1                | 0              | 1.369058                | -3.077833 | -0.353539 |
| 39               | 7                | 0              | -3.563588               | -0.793336 | 0.204225  |
| 40               | 7                | 0              | 3.605514                | -0.614651 | 0.186224  |

## N-TS

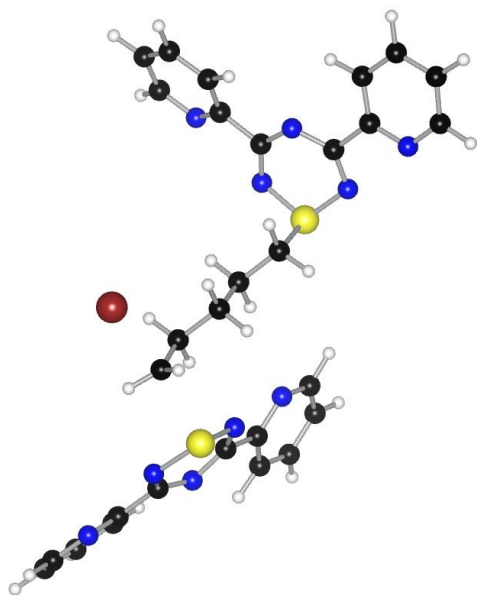

HF (B3LYP/6-31+G(d,p)) = -5036.408744 Hartrees

HF (M062X/6-31+G(d,p)//B3LYP/6-31+G(d,p)) = -5035.789274 Hartrees

Imaginary Frequencies: 1 (-307.94 cm<sup>-1</sup>)

Zero point correction = 0.512392 (Hartree/Particle)

Thermal correction = 0.428167 Hartrees

Coordinates from last standard orientation:

| Center Number | Atomic Number | Atomic Type | Coordinates (Angstroms) |           |           |
|---------------|---------------|-------------|-------------------------|-----------|-----------|
|               |               |             | X                       | Y         | Z         |
| 1             | 7             | 0           | -4.326424               | -2.019084 | -0.336538 |
| 2             | 6             | 0           | -5.256184               | -1.077552 | -0.336535 |
| 3             | 6             | 0           | -4.448177               | 0.236796  | 1.410698  |
| 4             | 7             | 0           | -3.369188               | -0.461638 | 1.716426  |
| 5             | 16            | 0           | -2.942174               | -1.603040 | 0.544970  |
| 6             | 7             | 0           | -5.323307               | 0.060985  | 0.390890  |
| 7             | 6             | 0           | 0.115458                | 0.698314  | -1.173834 |
| 8             | 6             | 0           | 1.442124                | 1.225447  | -0.616888 |
| 9             | 1             | 0           | -0.474416               | 1.547156  | -1.539744 |
| 10            | 1             | 0           | 0.323228                | 0.040824  | -2.028703 |
| 11            | 6             | 0           | 2.288018                | 1.898389  | -1.652975 |
| 12            | 1             | 0           | 1.260406                | 1.931068  | 0.200589  |
| 13            | 1             | 0           | 1.996501                | 0.375763  | -0.189786 |
| 14            | 1             | 0           | 3.160354                | 2.469857  | -1.370937 |
| 15            | 1             | 0           | 1.990650                | 1.922880  | -2.688493 |
| 16            | 35            | 0           | 1.076205                | 4.214656  | -1.706309 |
| 17            | 7             | 0           | 3.168588                | -1.238774 | -1.313745 |
| 18            | 6             | 0           | 3.957717                | -1.744022 | -0.394593 |
| 19            | 6             | 0           | 5.700905                | -0.188567 | -0.482332 |
| 20            | 7             | 0           | 5.231458                | 0.614681  | -1.401512 |
| 21            | 16            | 0           | 3.827742                | 0.058417  | -2.219606 |
| 22            | 7             | 0           | 5.204907                | -1.370554 | -0.006102 |
| 23            | 6             | 0           | -0.670953               | -0.091672 | -0.117068 |
| 24            | 1             | 0           | -0.063963               | -0.942438 | 0.217366  |
| 25            | 1             | 0           | -0.862597               | 0.544505  | 0.754773  |
| 26            | 6             | 0           | -1.998248               | -0.593183 | -0.684592 |

|    |   |   |           |           |           |
|----|---|---|-----------|-----------|-----------|
| 27 | 1 | 0 | -1.851971 | -1.284504 | -1.522305 |
| 28 | 1 | 0 | -2.657009 | 0.220035  | -1.004501 |
| 29 | 6 | 0 | 6.968915  | 0.265136  | 0.196346  |
| 30 | 6 | 0 | 8.517883  | 0.117440  | 2.039446  |
| 31 | 6 | 0 | 8.814036  | 1.634229  | 0.212771  |
| 32 | 6 | 0 | 9.272751  | 1.120357  | 1.429843  |
| 33 | 1 | 0 | 8.829732  | -0.315263 | 2.986792  |
| 34 | 1 | 0 | 9.376531  | 2.413837  | -0.299877 |
| 35 | 1 | 0 | 10.188985 | 1.495911  | 1.876663  |
| 36 | 6 | 0 | 3.400352  | -2.922071 | 0.365760  |
| 37 | 6 | 0 | 3.759766  | -4.862409 | 1.751912  |
| 38 | 6 | 0 | 1.588785  | -4.180845 | 1.012173  |
| 39 | 6 | 0 | 2.381413  | -5.081181 | 1.729344  |
| 40 | 1 | 0 | 4.420033  | -5.533289 | 2.295804  |
| 41 | 1 | 0 | 0.507933  | -4.310661 | 0.977535  |
| 42 | 1 | 0 | 1.927793  | -5.918295 | 2.252047  |
| 43 | 6 | 0 | -4.781351 | 1.375309  | 2.337645  |
| 44 | 6 | 0 | -5.879115 | 3.477940  | 2.743040  |
| 45 | 6 | 0 | -4.503155 | 2.391461  | 4.374813  |
| 46 | 6 | 0 | -5.313808 | 3.473591  | 4.018174  |
| 47 | 1 | 0 | -6.508441 | 4.300984  | 2.416048  |
| 48 | 1 | 0 | -4.045579 | 2.348653  | 5.361690  |
| 49 | 1 | 0 | -5.486775 | 4.284992  | 4.718745  |
| 50 | 6 | 0 | -6.449768 | -1.337177 | -1.218249 |
| 51 | 6 | 0 | -8.722453 | -0.862767 | -1.856087 |
| 52 | 6 | 0 | -7.381221 | -2.516080 | -2.953394 |
| 53 | 6 | 0 | -8.601423 | -1.841806 | -2.842389 |
| 54 | 1 | 0 | -9.650102 | -0.311032 | -1.730689 |
| 55 | 1 | 0 | -7.243468 | -3.282139 | -3.714736 |
| 56 | 1 | 0 | -9.423077 | -2.078715 | -3.511799 |
| 57 | 7 | 0 | -6.328149 | -2.278814 | -2.167556 |
| 58 | 7 | 0 | -4.230671 | 1.368272  | 3.561061  |
| 59 | 7 | 0 | 2.072984  | -3.131524 | 0.340295  |
| 60 | 7 | 0 | 7.696931  | 1.227513  | -0.394878 |
| 61 | 6 | 0 | -7.630318 | -0.601879 | -1.030739 |
| 62 | 1 | 0 | -7.664064 | 0.147581  | -0.250209 |
| 63 | 6 | 0 | -5.618646 | 2.408115  | 1.888995  |
| 64 | 1 | 0 | -6.032514 | 2.358232  | 0.889605  |
| 65 | 6 | 0 | 4.277830  | -3.764741 | 1.068796  |
| 66 | 1 | 0 | 5.336015  | -3.535029 | 1.058887  |
| 67 | 6 | 0 | 7.352685  | -0.321464 | 1.414334  |
| 68 | 1 | 0 | 6.726730  | -1.097973 | 1.835343  |

---

N

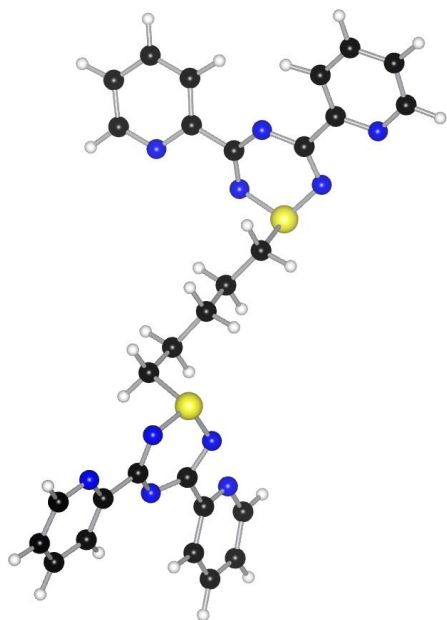

HF (B3LYP/6-31+G(d,p)) = -2464.6003596 Hartrees

HF (M062X/6-31+G(d,p)//B3LYP/6-31+G(d,p)) = -2463.8650475 Hartrees

Imaginary Frequencies: none found

Zero point correction = 0.514736 (Hartree/Particle)

Thermal correction = 0.436576 Hartrees

Coordinates from last standard orientation:

| Center Number | Atomic Number | Atomic Type | Coordinates (Angstroms) |           |           |
|---------------|---------------|-------------|-------------------------|-----------|-----------|
|               |               |             | X                       | Y         | Z         |
| 1             | 7             | 0           | 4.805241                | -1.945447 | 0.298872  |
| 2             | 6             | 0           | 5.603948                | -0.935180 | 0.605619  |
| 3             | 6             | 0           | 5.047252                | 0.515695  | -1.137927 |
| 4             | 7             | 0           | 4.172914                | -0.250819 | -1.776799 |
| 5             | 16            | 0           | 3.658796                | -1.581564 | -0.881616 |
| 6             | 7             | 0           | 5.699119                | 0.284618  | 0.021929  |
| 7             | 6             | 0           | -0.044523               | 0.134303  | 0.103608  |
| 8             | 6             | 0           | -1.263072               | 0.485211  | -0.763071 |
| 9             | 1             | 0           | 0.313045                | 1.036007  | 0.620080  |
| 10            | 1             | 0           | -0.335353               | -0.579445 | 0.885279  |
| 11            | 6             | 0           | -2.402515               | 1.181252  | -0.015263 |
| 12            | 1             | 0           | -0.951954               | 1.162386  | -1.569707 |
| 13            | 1             | 0           | -1.650468               | -0.419200 | -1.245819 |
| 14            | 1             | 0           | -3.219811               | 1.461035  | -0.685937 |
| 15            | 1             | 0           | -2.068694               | 2.072045  | 0.528158  |
| 16            | 7             | 0           | -3.669665               | -1.231766 | 0.416974  |
| 17            | 6             | 0           | -4.854611               | -1.066138 | -0.157244 |
| 18            | 6             | 0           | -5.561890               | 0.831883  | 1.006711  |
| 19            | 7             | 0           | -4.488121               | 1.031352  | 1.755064  |
| 20            | 16            | 0           | -3.155722               | 0.103626  | 1.302585  |
| 21            | 7             | 0           | -5.759911               | -0.081159 | 0.023943  |
| 22            | 6             | 0           | 1.098988                | -0.465406 | -0.729693 |
| 23            | 1             | 0           | 0.729911                | -1.348561 | -1.267259 |
| 24            | 1             | 0           | 1.425362                | 0.257943  | -1.485798 |
| 25            | 6             | 0           | 2.291211                | -0.859996 | 0.142220  |
| 26            | 1             | 0           | 2.043295                | -1.653974 | 0.855203  |



|    |   |   |           |           |           |
|----|---|---|-----------|-----------|-----------|
| 27 | 1 | 0 | 2.714783  | -0.010839 | 0.687442  |
| 28 | 6 | 0 | -6.745579 | 1.711593  | 1.309509  |
| 29 | 6 | 0 | -9.017468 | 2.385119  | 0.888272  |
| 30 | 6 | 0 | -7.637340 | 3.426262  | 2.546750  |
| 31 | 6 | 0 | -8.870258 | 3.343456  | 1.889981  |
| 32 | 1 | 0 | -9.953925 | 2.285511  | 0.346911  |
| 33 | 1 | 0 | -7.480698 | 4.163755  | 3.331749  |
| 34 | 1 | 0 | -9.681388 | 4.013279  | 2.158392  |
| 35 | 6 | 0 | -5.275159 | -2.165584 | -1.091441 |
| 36 | 6 | 0 | -6.994117 | -3.450726 | -2.177617 |
| 37 | 6 | 0 | -4.655886 | -3.861963 | -2.506693 |
| 38 | 6 | 0 | -5.984873 | -4.195034 | -2.787925 |
| 39 | 1 | 0 | -8.040496 | -3.673622 | -2.365362 |
| 40 | 1 | 0 | -3.840540 | -4.412803 | -2.971550 |
| 41 | 1 | 0 | -6.213790 | -5.011049 | -3.466352 |
| 42 | 6 | 0 | 5.414184  | 1.794543  | -1.838096 |
| 43 | 6 | 0 | 6.971391  | 3.578879  | -2.261296 |
| 44 | 6 | 0 | 4.833380  | 3.434227  | -3.334250 |
| 45 | 6 | 0 | 6.045200  | 4.109919  | -3.158674 |
| 46 | 1 | 0 | 7.926191  | 4.068588  | -2.092720 |
| 47 | 1 | 0 | 4.081254  | 3.822636  | -4.018304 |
| 48 | 1 | 0 | 6.248561  | 5.023416  | -3.708936 |
| 49 | 6 | 0 | 6.572038  | -1.182223 | 1.731992  |
| 50 | 6 | 0 | 8.346783  | -0.429325 | 3.172801  |
| 51 | 6 | 0 | 7.373517  | -2.612057 | 3.338109  |
| 52 | 6 | 0 | 8.305855  | -1.675008 | 3.797368  |
| 53 | 1 | 0 | 9.049996  | 0.332580  | 3.496782  |
| 54 | 1 | 0 | 7.307041  | -3.594608 | 3.801588  |
| 55 | 1 | 0 | 8.971374  | -1.920001 | 4.619388  |
| 56 | 7 | 0 | -6.596282 | 2.638942  | 2.268960  |
| 57 | 7 | 0 | -4.298605 | -2.876896 | -1.678074 |
| 58 | 7 | 0 | 4.516745  | 2.302985  | -2.698121 |
| 59 | 7 | 0 | 6.522936  | -2.380130 | 2.336391  |
| 60 | 6 | 0 | 7.467883  | -0.175308 | 2.120626  |
| 61 | 1 | 0 | 7.454716  | 0.774444  | 1.601973  |
| 62 | 6 | 0 | 6.650896  | 2.404077  | -1.583128 |
| 63 | 1 | 0 | 7.330129  | 1.949805  | -0.872863 |
| 64 | 6 | 0 | -7.939545 | 1.552263  | 0.590826  |
| 65 | 1 | 0 | -7.996936 | 0.793970  | -0.179142 |
| 66 | 6 | 0 | -6.636270 | -2.412769 | -1.318819 |
| 67 | 1 | 0 | -7.377898 | -1.799835 | -0.822184 |

---

## References

1. M. D. Hanwell, D. E. Curtis, D. C. Lonie, T. Vandermeersch, E. Zurek and G. R. Hutchison, *J. Cheminform.*, 2012, **4**, 17.
2. T. A. Halgren, *J. Comp. Chem.*, 1996, **17**, 490-519.
3. (a) A. D. Becke, *J. Chem. Phys.* 1993, **98**, 5648–5652. (b) A. D. Becke, *J. Chem. Phys.* 1993, **98**, 1372–1377. (c) C. Lee, W. Yang, R. G. Parr, *Phys. Rev. B* 1988, **37**, 785–789. (d) P. J. Stephens, F. J. Devlin, C. F. Chabalowski, M. J. Frisch, *J. Phys. Chem.* 1994, **98**, 11623–11627.
